# Supplementary material for: The synthesis of 3-hydroxy-2,4,8-trimethyldec-8-enolides and an approach to 3,4-dihydroxy-2,4,6,8-tetramethyldec-8-enolide
Source: Royal Society of Chemistry journal article supplement (doi:10.1039/c4ob01792g), 2014-10-22
Supplement: c4ob01792g1.pdf [file c4ob01792g1.pdf]

## Supporting Information

### The synthesis of 3-hydroxy-2,4,8-trimethyldec-8-enolides and an approach to 3,4-dihydroxy-2,4,6,8-tetramethyldec-8-enolide

J. M. Botubol-Ares,<sup>a</sup> M. J. Durán Peña,<sup>a</sup> A. J. Macías-Sánchez,<sup>a</sup> J. R. Hanson,<sup>b</sup> I. G. Collado<sup>a</sup>  
and R. Hernández-Galán<sup>a, \*</sup>

<sup>a</sup>*Departamento de Química Orgánica, Facultad de Ciencias, UCA, Polígono Río San Pedro s/n, 11510, Puerto Real, Cádiz, Spain*

*rosario.hernandez@uca.es*

<sup>b</sup>*Department of Chemistry, University of Sussex, Brighton, Sussex, BN1 9QJ, United Kingdom.*

*j.r.hanson@sussex.ac.uk*

#### Table of contents:

|                                                                                      |               |
|--------------------------------------------------------------------------------------|---------------|
| <sup>1</sup> H and <sup>13</sup> C spectrum of compound <b>6</b> .....               | <b>S3-4</b>   |
| <sup>1</sup> H and <sup>13</sup> C spectrum of compound <b>7</b> .....               | <b>S5-6</b>   |
| <sup>1</sup> H and <sup>13</sup> C spectrum of compound ( <b>Z</b> )- <b>8</b> ..... | <b>S7-8</b>   |
| <sup>1</sup> H and <sup>13</sup> C spectrum of compound ( <b>E</b> )- <b>8</b> ..... | <b>S9-10</b>  |
| <sup>1</sup> H and <sup>13</sup> C spectrum of compound <b>10a</b> .....             | <b>S11-12</b> |
| <sup>1</sup> H and <sup>13</sup> C spectrum of compound <b>10b</b> .....             | <b>S13-14</b> |
| <sup>1</sup> H and <sup>13</sup> C spectrum of compound <b>11a</b> .....             | <b>S15-16</b> |
| <sup>1</sup> H and <sup>13</sup> C spectrum of compound <b>11b</b> .....             | <b>S17-18</b> |
| <sup>1</sup> H and <sup>13</sup> C spectrum of compound <b>12b</b> .....             | <b>S19-20</b> |

|                                                                        |               |
|------------------------------------------------------------------------|---------------|
| $^1\text{H}$ and $^{13}\text{C}$ spectrum of compound <b>13a</b> ..... | <b>S21-22</b> |
| $^1\text{H}$ and $^{13}\text{C}$ spectrum of compound <b>13b</b> ..... | <b>S23-24</b> |
| $^1\text{H}$ and $^{13}\text{C}$ spectrum of compound <b>14a</b> ..... | <b>S25-26</b> |
| $^1\text{H}$ and $^{13}\text{C}$ spectrum of compound <b>14b</b> ..... | <b>S27-28</b> |
| $^1\text{H}$ and $^{13}\text{C}$ spectrum of compound <b>15a</b> ..... | <b>S29-30</b> |
| $^1\text{H}$ and $^{13}\text{C}$ spectrum of compound <b>15b</b> ..... | <b>S31-32</b> |
| $^1\text{H}$ and $^{13}\text{C}$ spectrum of compound <b>16a</b> ..... | <b>S33-34</b> |
| $^1\text{H}$ and $^{13}\text{C}$ spectrum of compound <b>16b</b> ..... | <b>S35-36</b> |
| $^1\text{H}$ and $^{13}\text{C}$ spectrum of compound <b>17a</b> ..... | <b>S37-38</b> |
| $^1\text{H}$ and $^{13}\text{C}$ spectrum of compound <b>17b</b> ..... | <b>S39-40</b> |
| $^1\text{H}$ and $^{13}\text{C}$ spectrum of compound <b>19a</b> ..... | <b>S41-42</b> |
| $^1\text{H}$ and $^{13}\text{C}$ spectrum of compound <b>19b</b> ..... | <b>S43-44</b> |
| $^1\text{H}$ and $^{13}\text{C}$ spectrum of compound <b>20a</b> ..... | <b>S45-46</b> |
| $^1\text{H}$ and $^{13}\text{C}$ spectrum of compound <b>20b</b> ..... | <b>S47-48</b> |
| $^1\text{H}$ and $^{13}\text{C}$ spectrum of compound <b>22</b> .....  | <b>S49-50</b> |
| $^1\text{H}$ and $^{13}\text{C}$ spectrum of compound <b>23</b> .....  | <b>S51-52</b> |
| $^1\text{H}$ and $^{13}\text{C}$ spectrum of compound <b>24</b> .....  | <b>S53-54</b> |
| $^1\text{H}$ and $^{13}\text{C}$ spectrum of compound <b>25</b> .....  | <b>S55-56</b> |
| $^1\text{H}$ and $^{13}\text{C}$ spectrum of compound <b>26a</b> ..... | <b>S57-58</b> |
| g-HMBC spectrum of compound <b>26a</b> .....                           | <b>S59</b>    |

4000 MHz  $^1\text{H}$  NMR of compound **6** in  $\text{CDCl}_3$

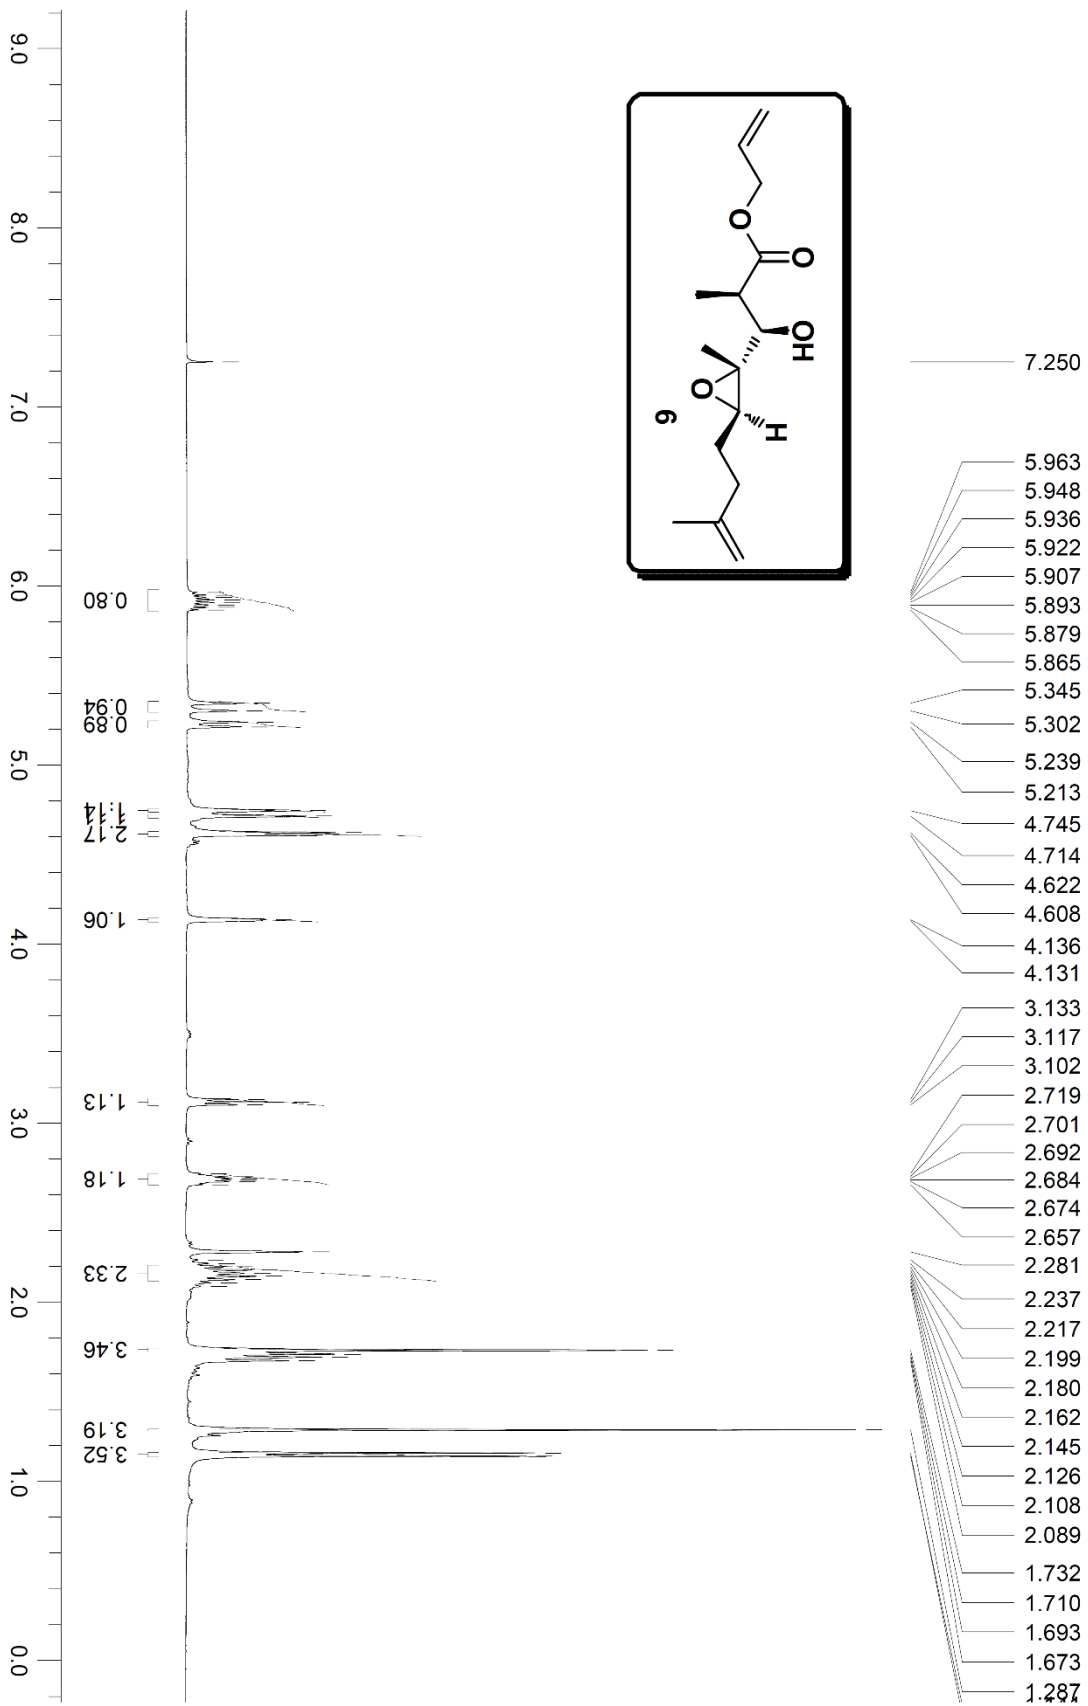

100 MHz  $^{13}\text{C}$  NMR of compound **6** in  $\text{CDCl}_3$

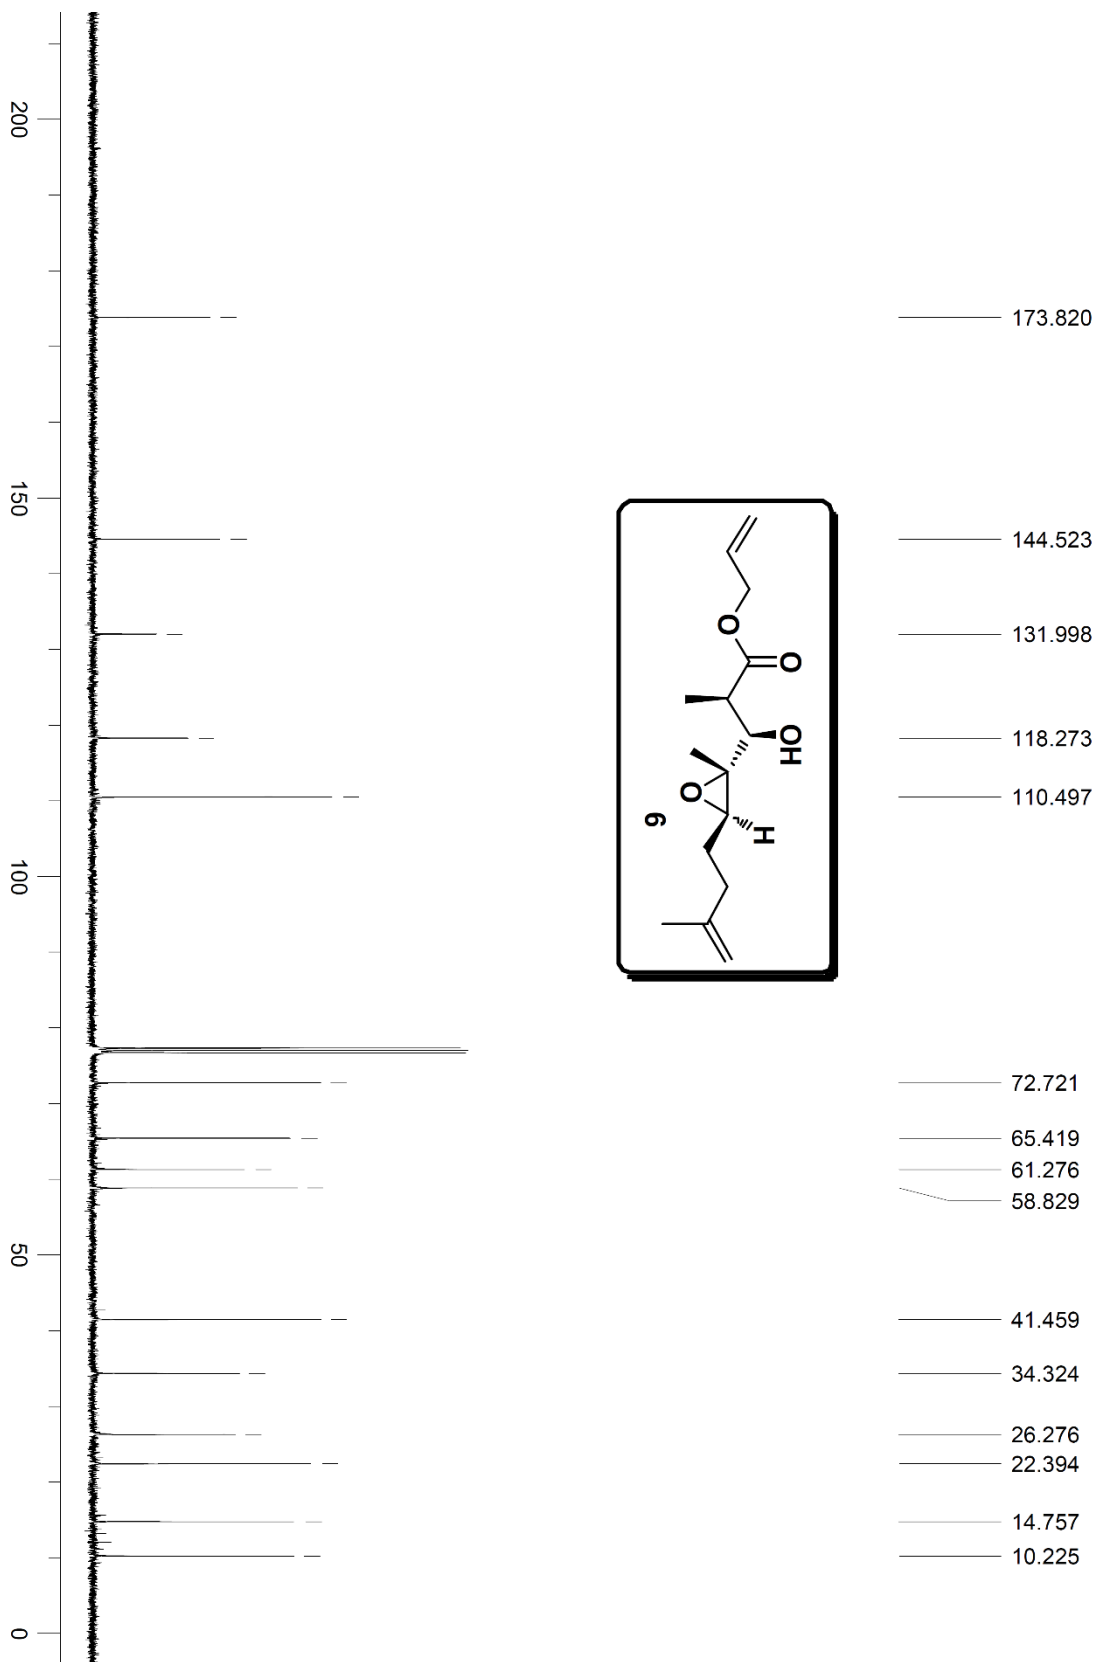



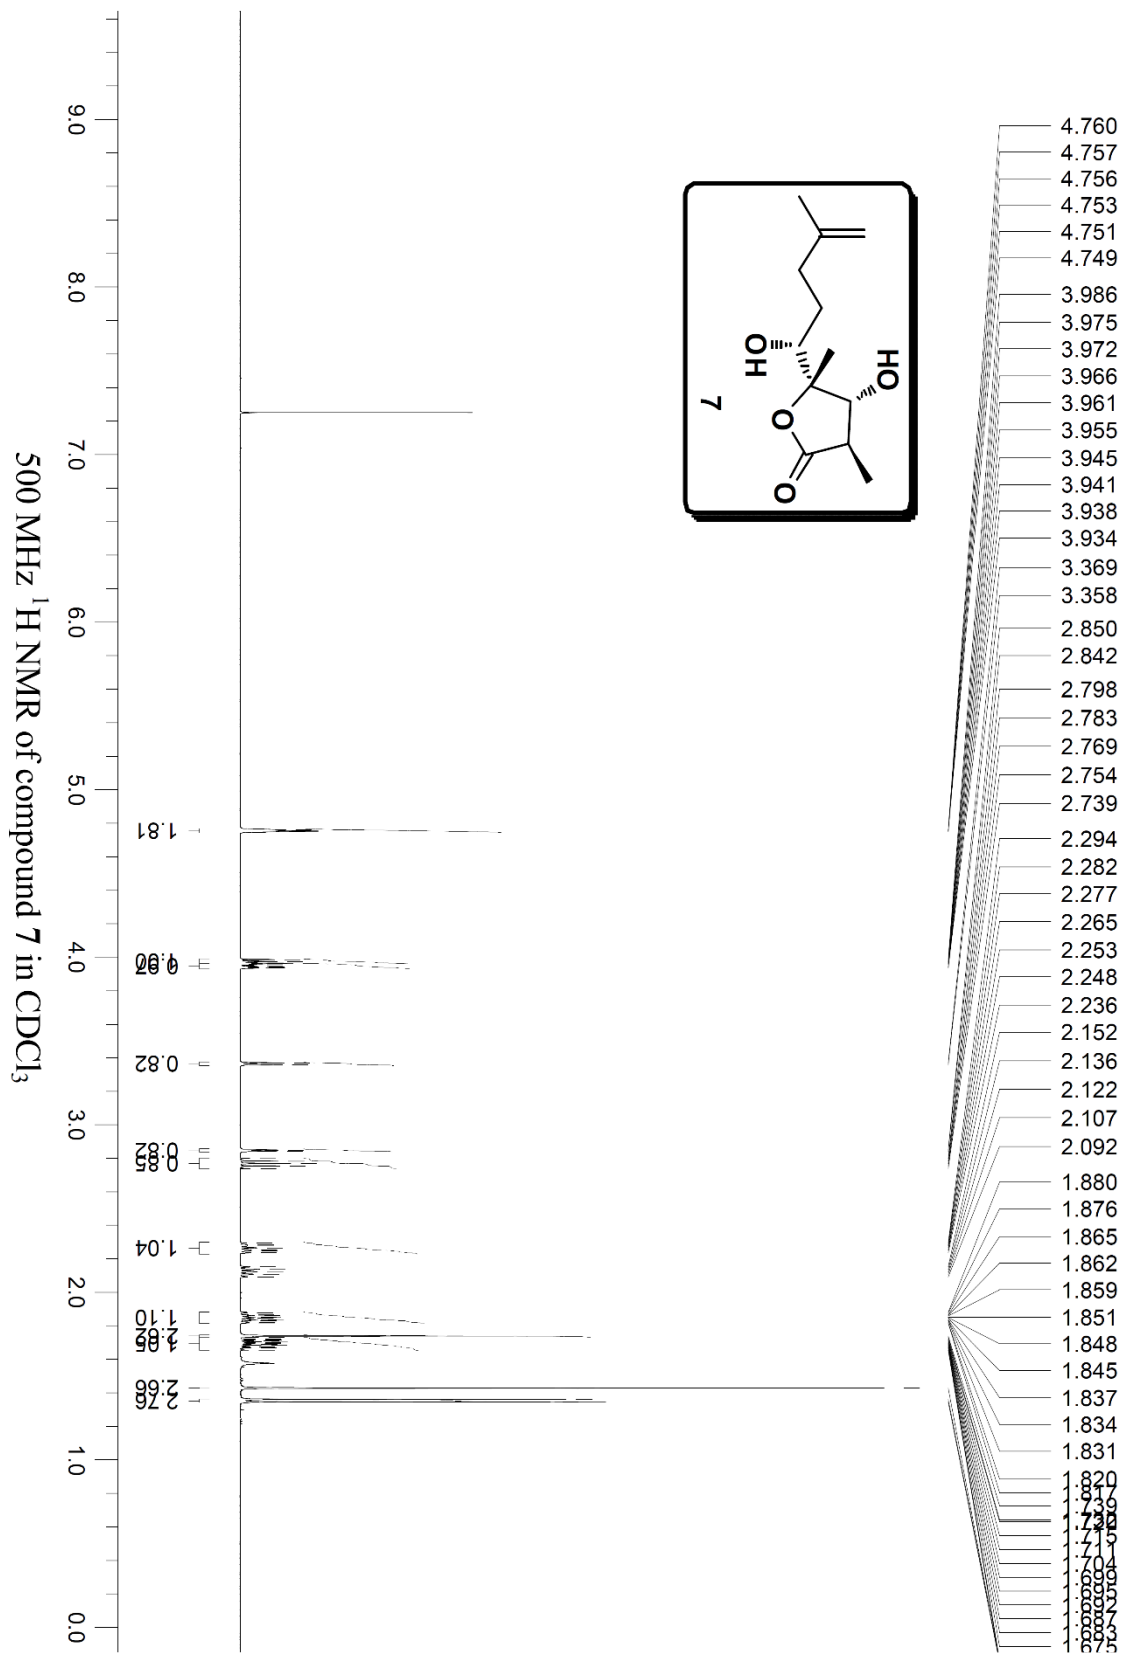

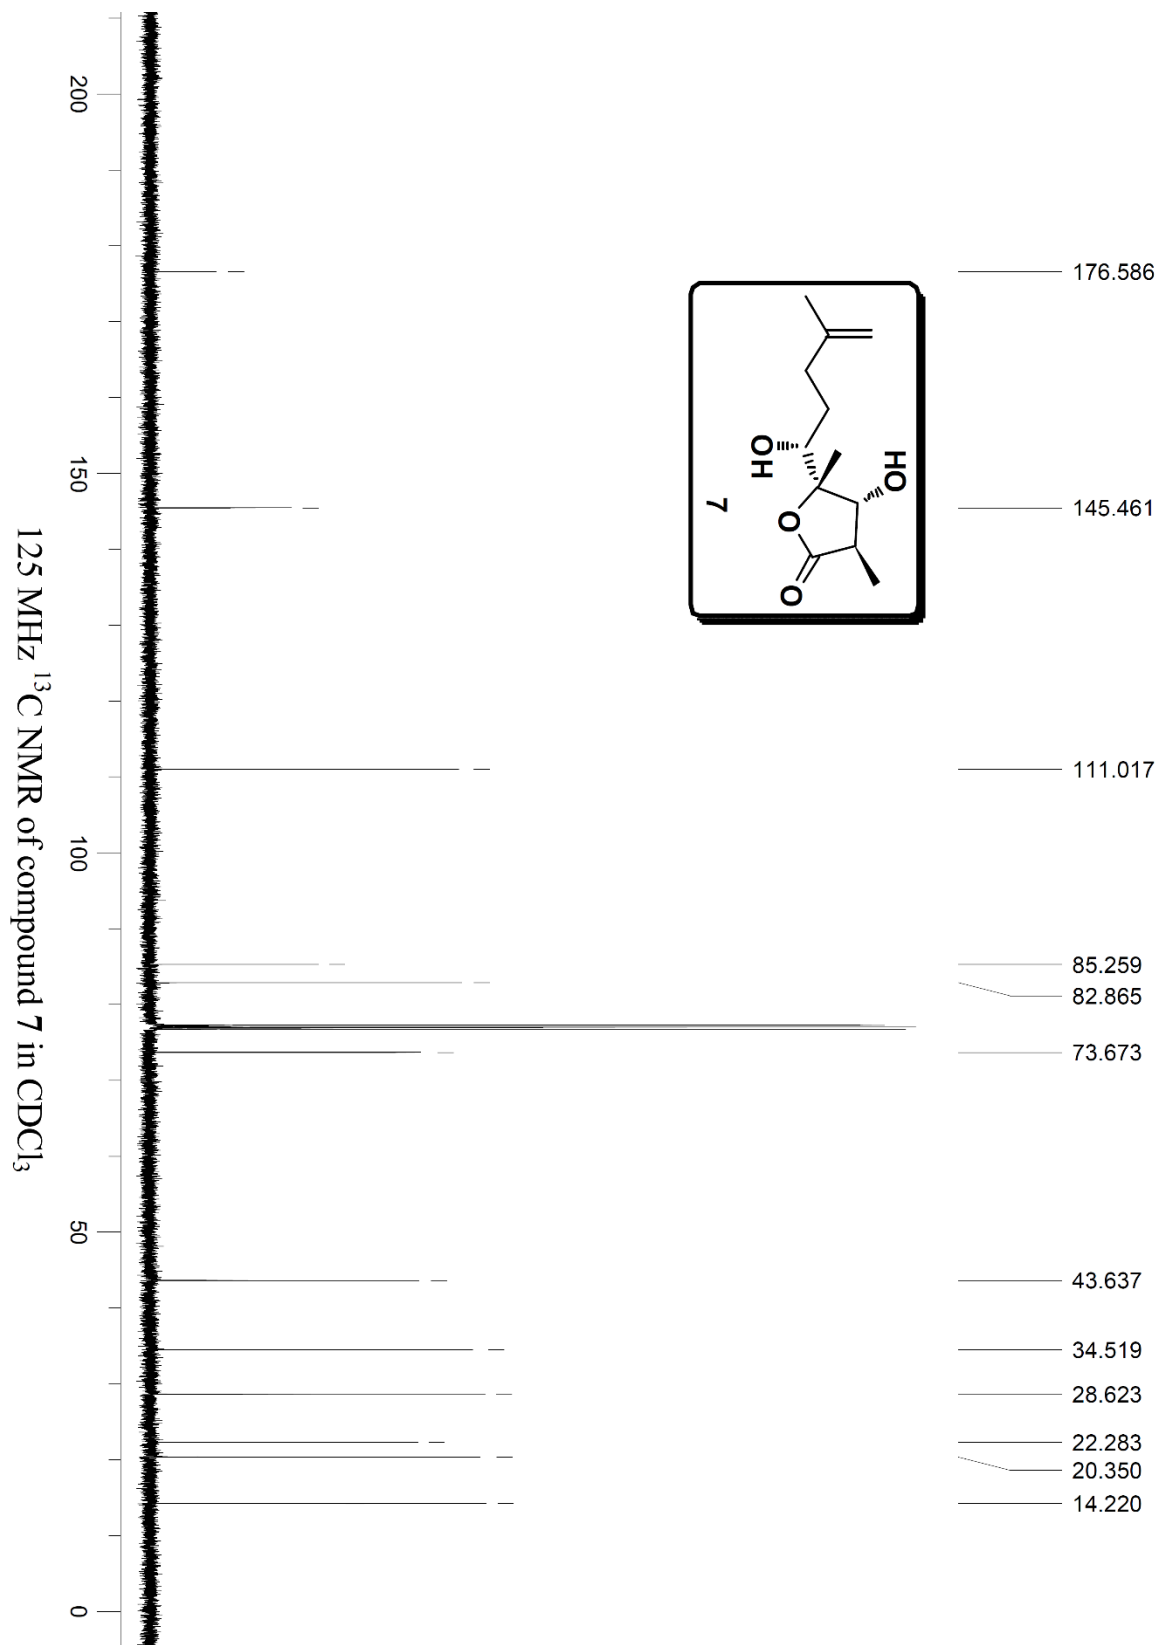

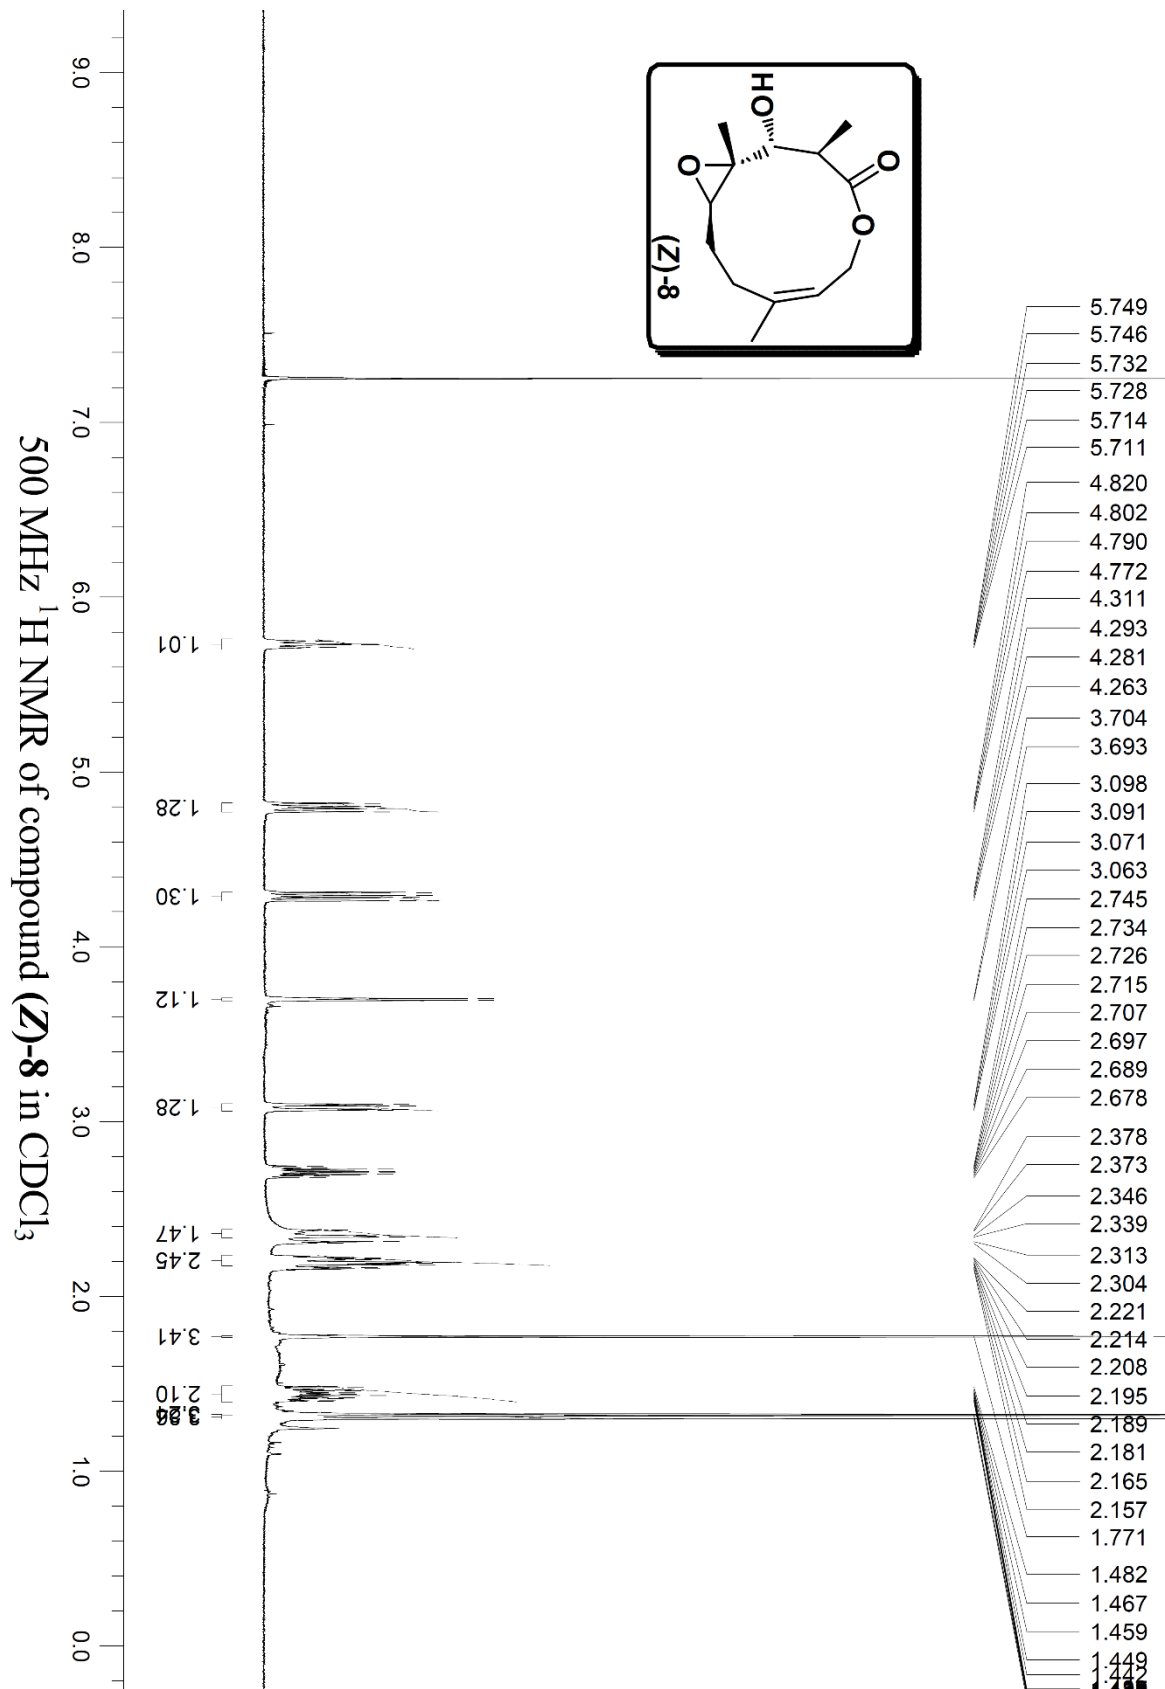

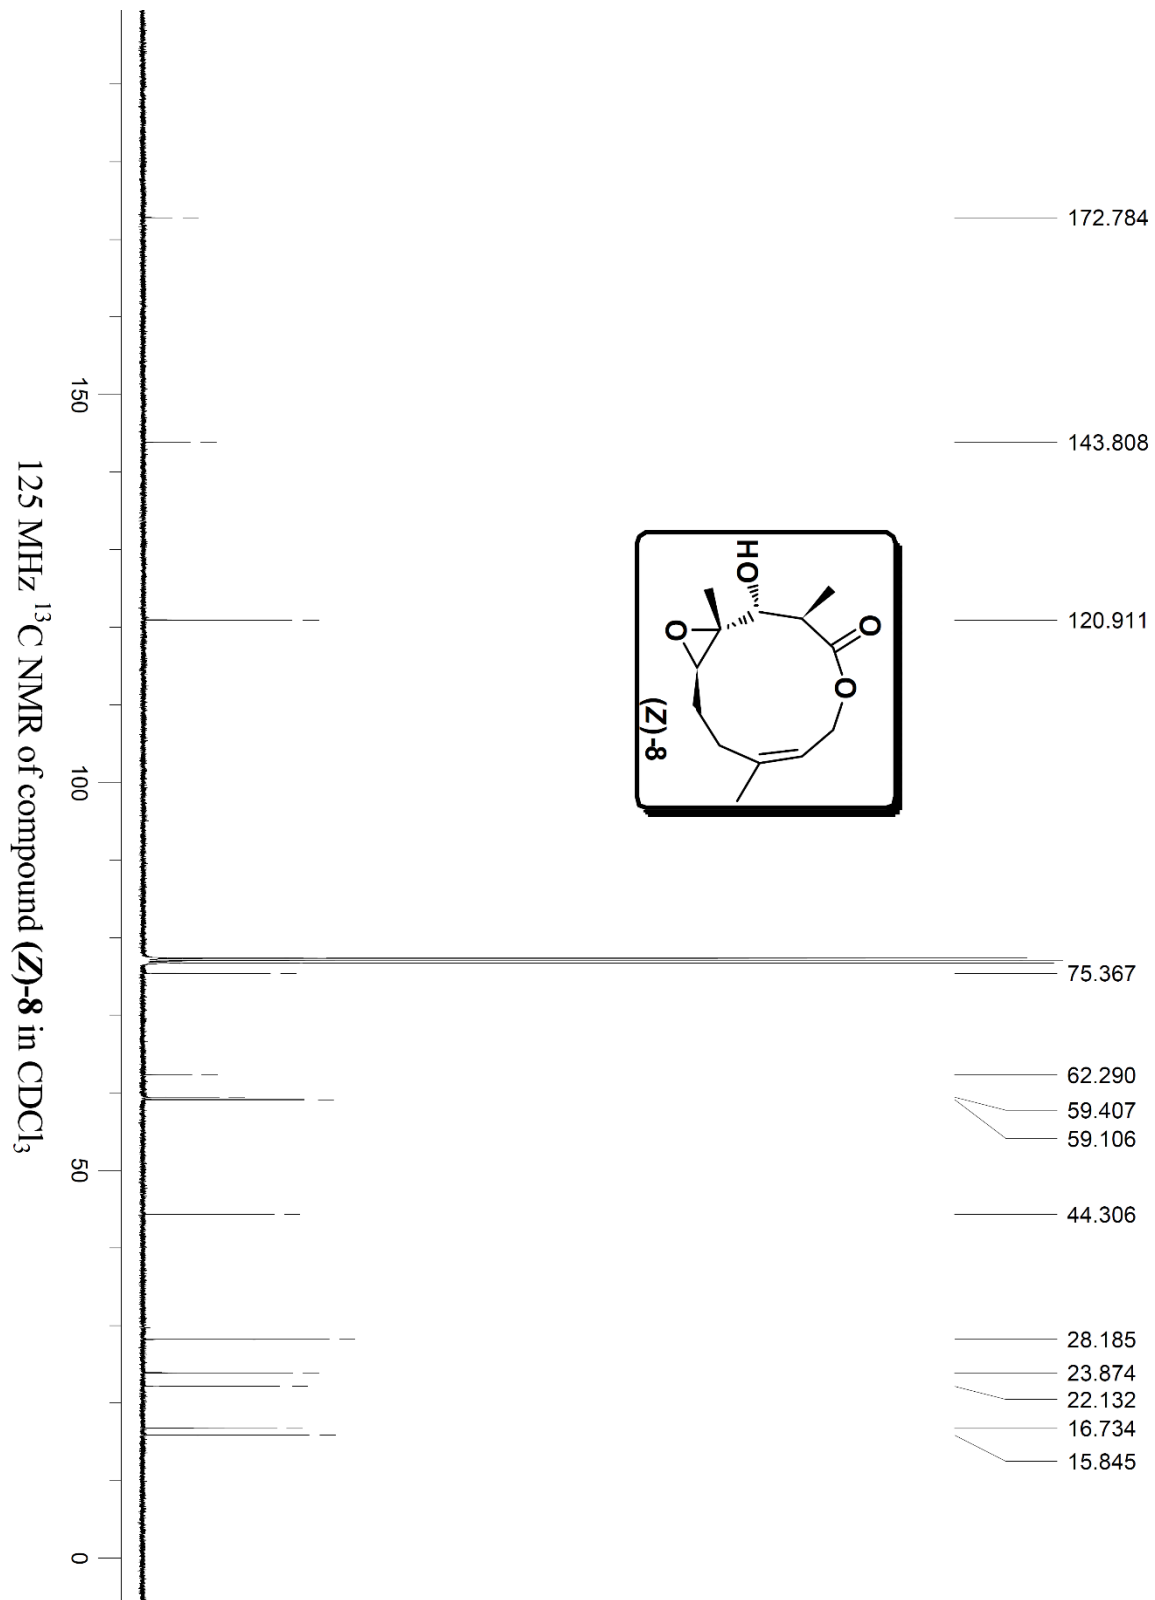

500 MHz <sup>1</sup>H NMR of compound (*E*)-8 in CDCl<sub>3</sub>

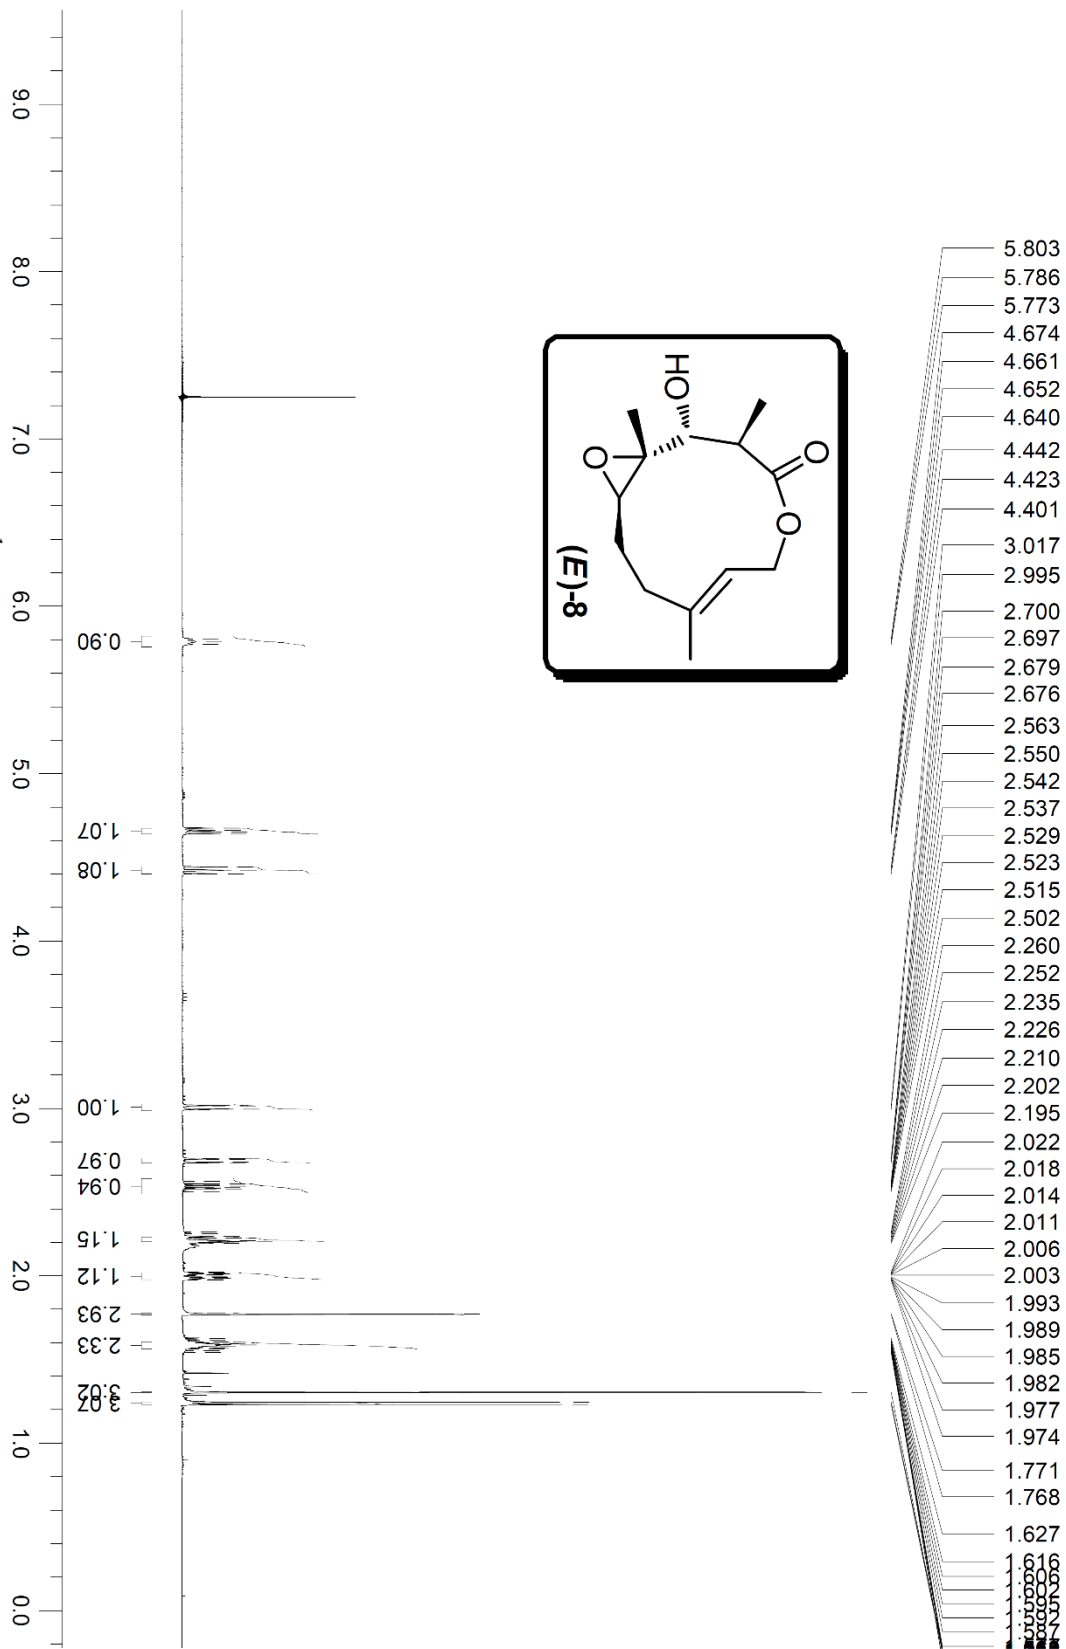

125 MHz  $^{13}\text{C}$  NMR of compound (*E*)-8 in  $\text{CDCl}_3$

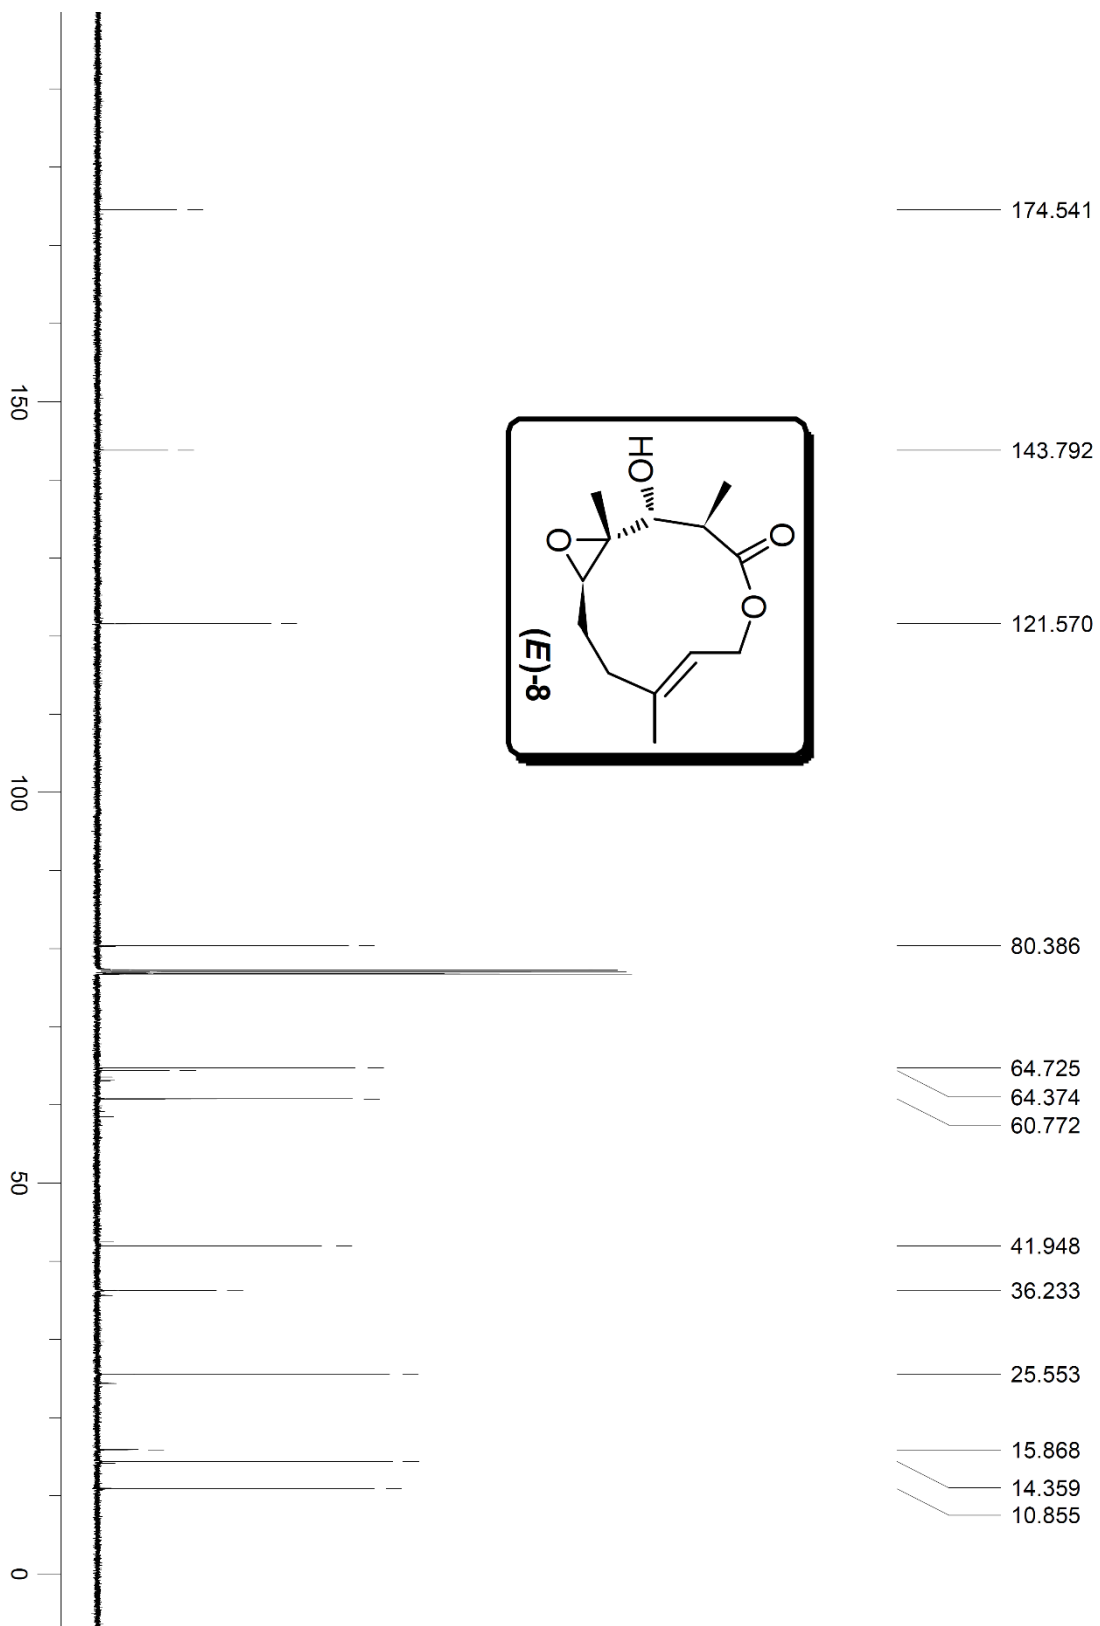







400 MHz  $^1\text{H}$  NMR of compound **10b** in  $\text{CDCl}_3$

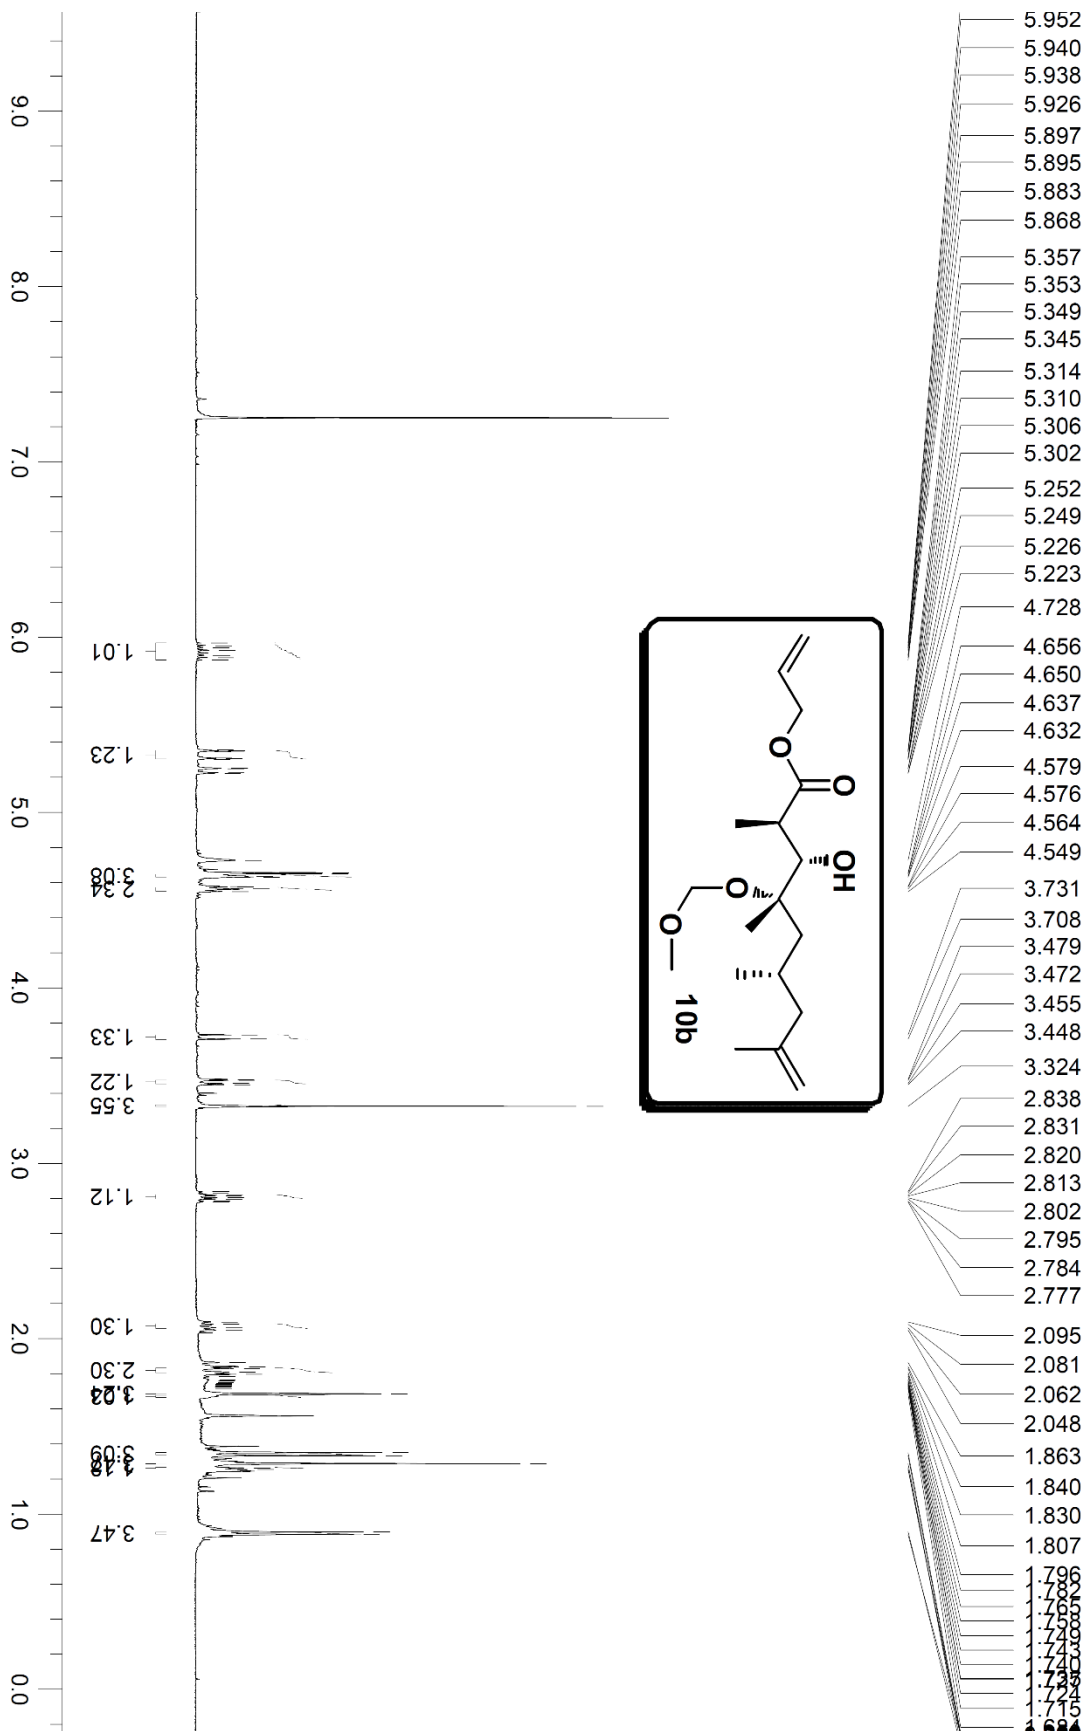

100 MHz  $^{13}\text{C}$  NMR of compound **10b** in  $\text{CDCl}_3$

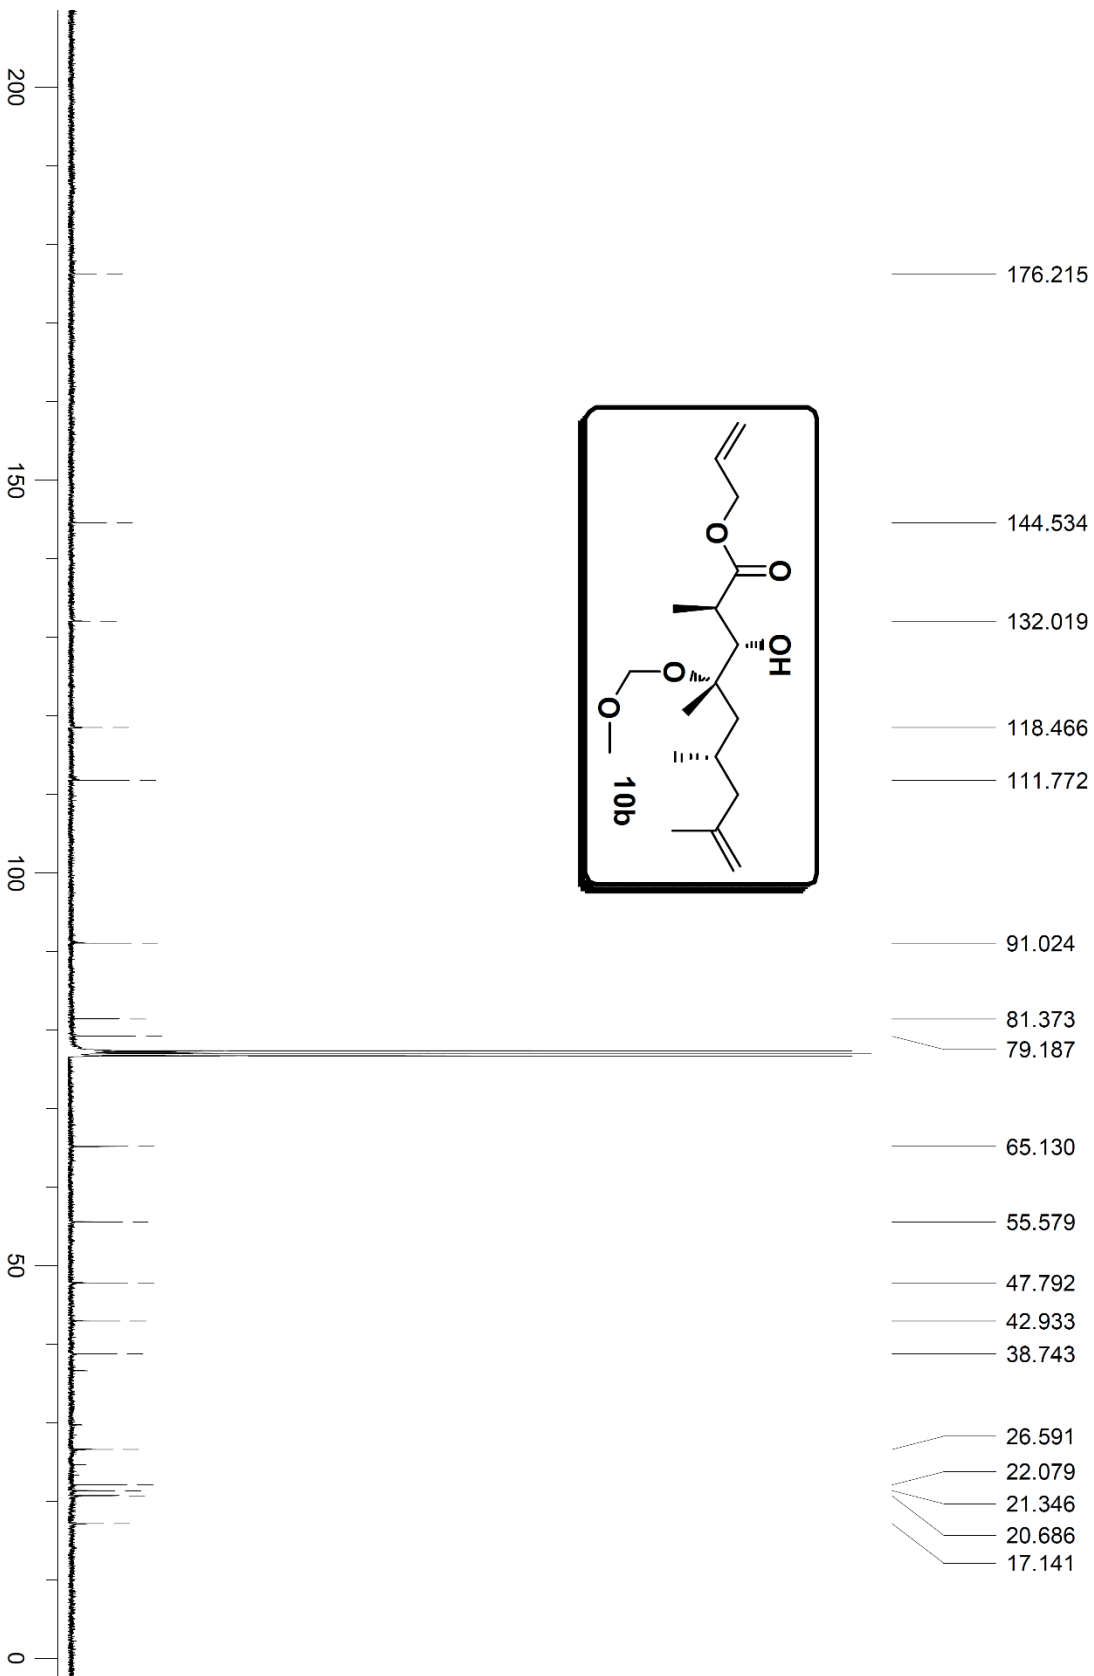

400 MHz  $^1\text{H}$  NMR of compound **11a** in  $\text{CDCl}_3$

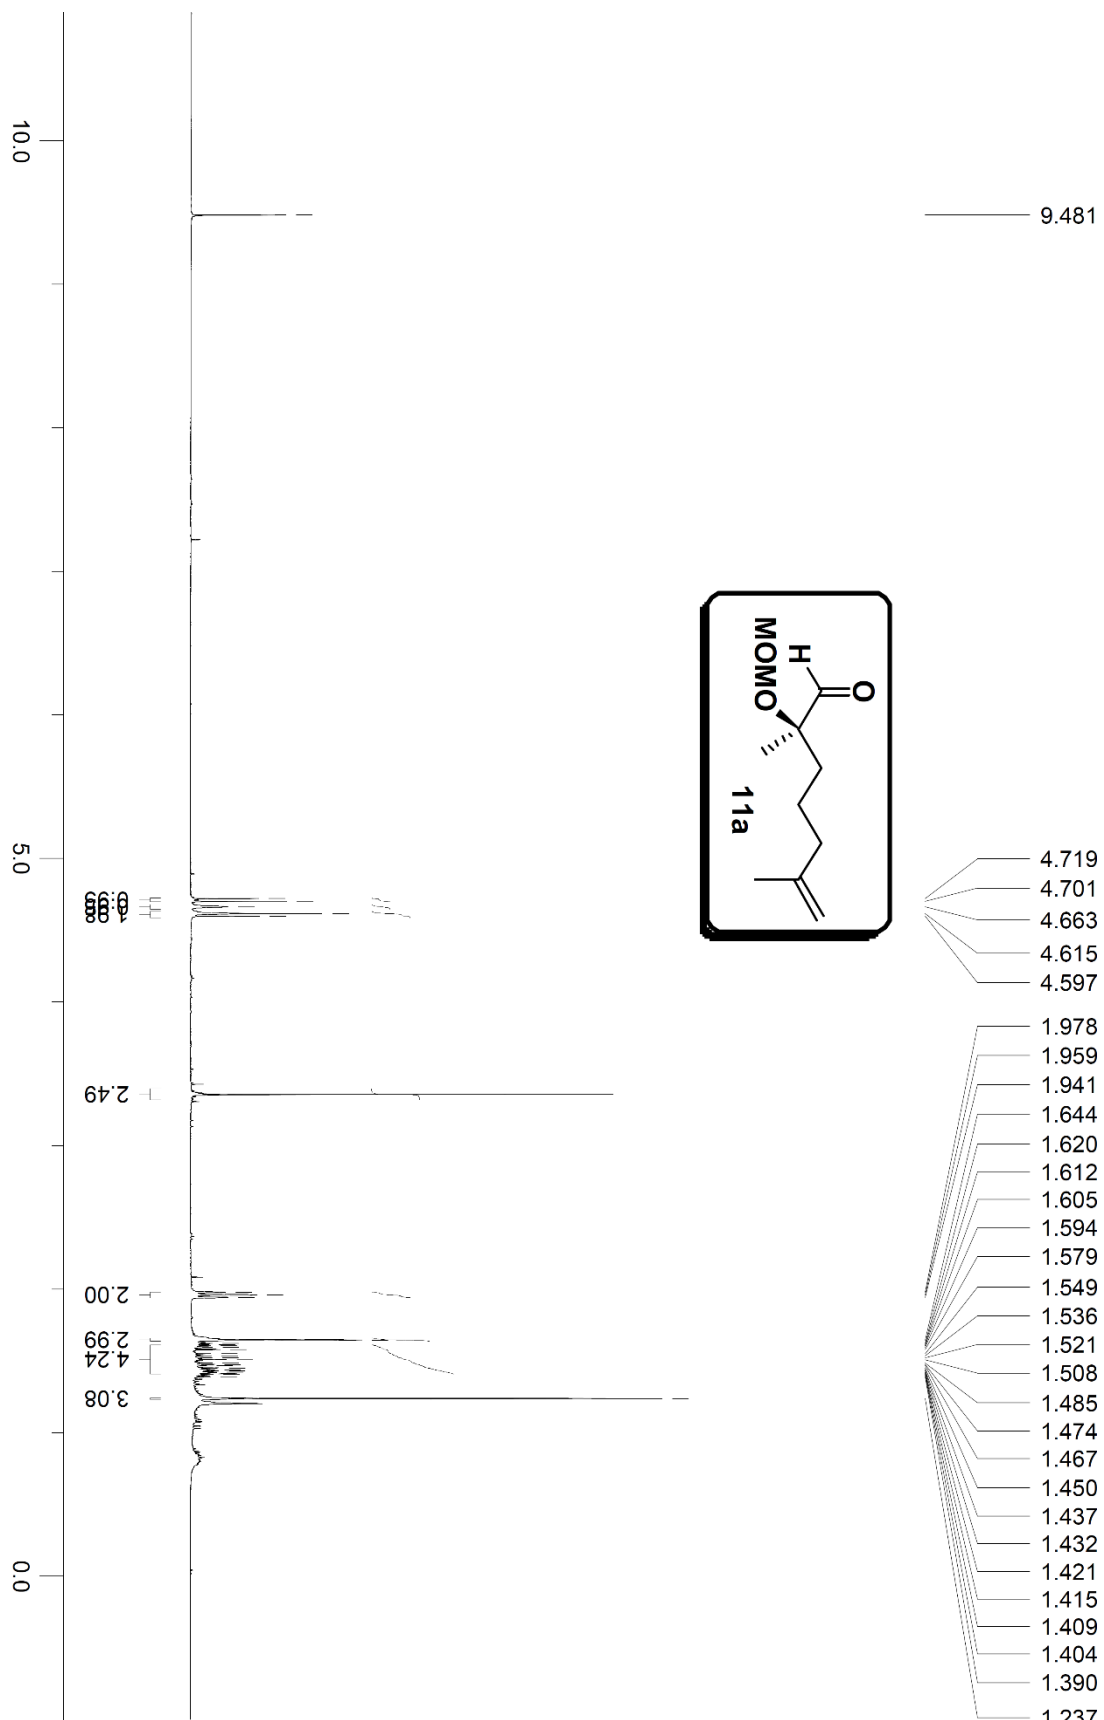

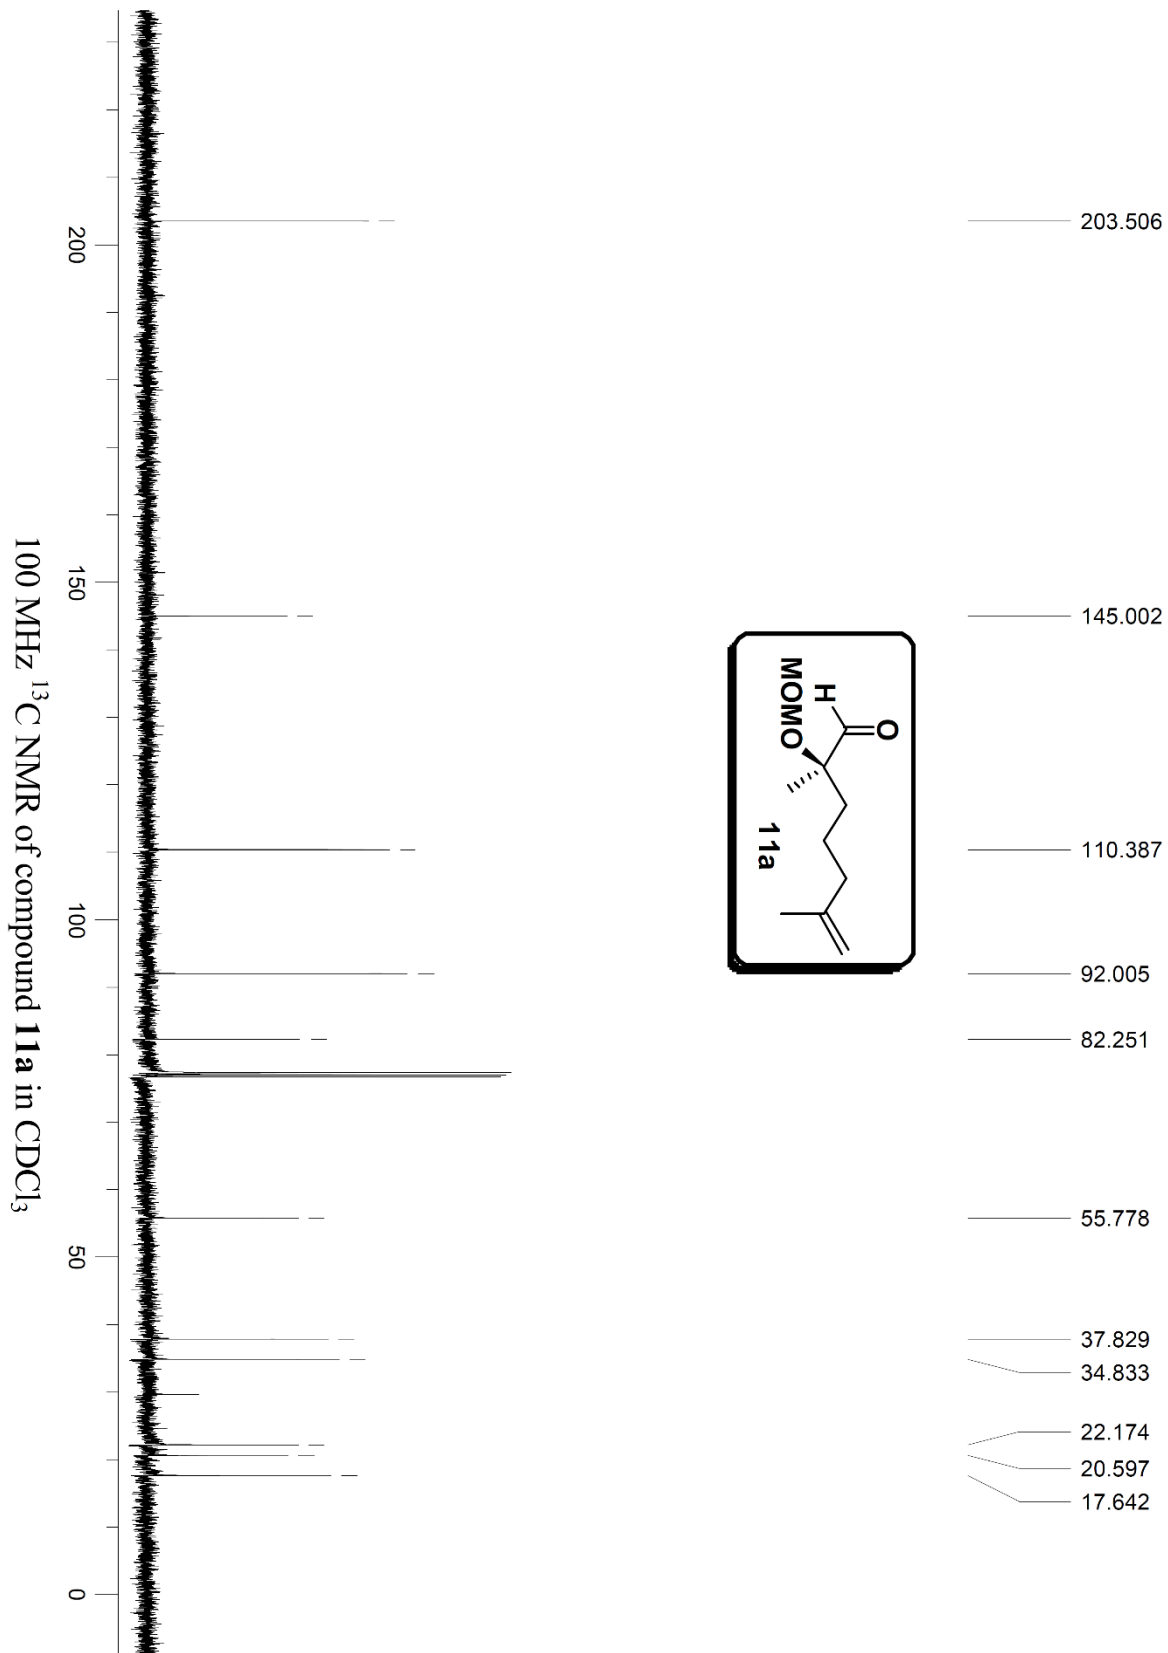

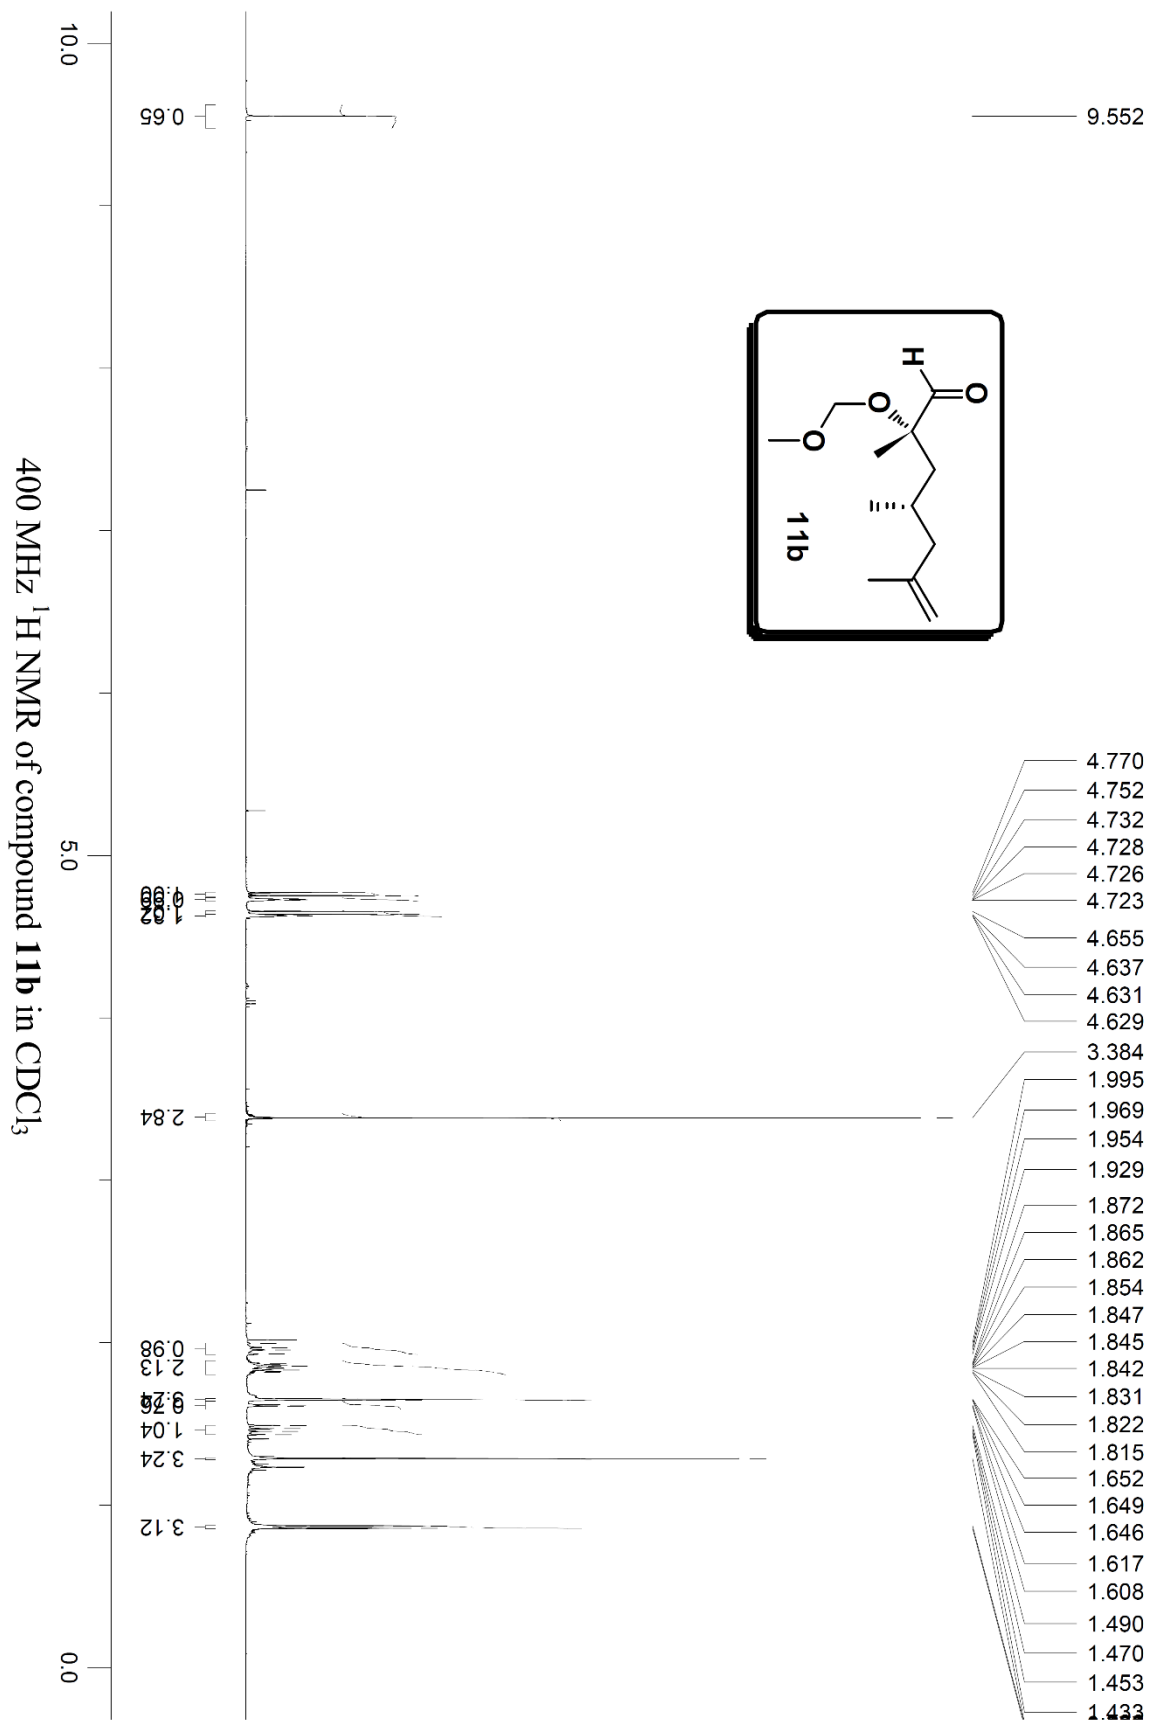

100 MHz  $^{13}\text{C}$  NMR of compound **11b** in  $\text{CDCl}_3$

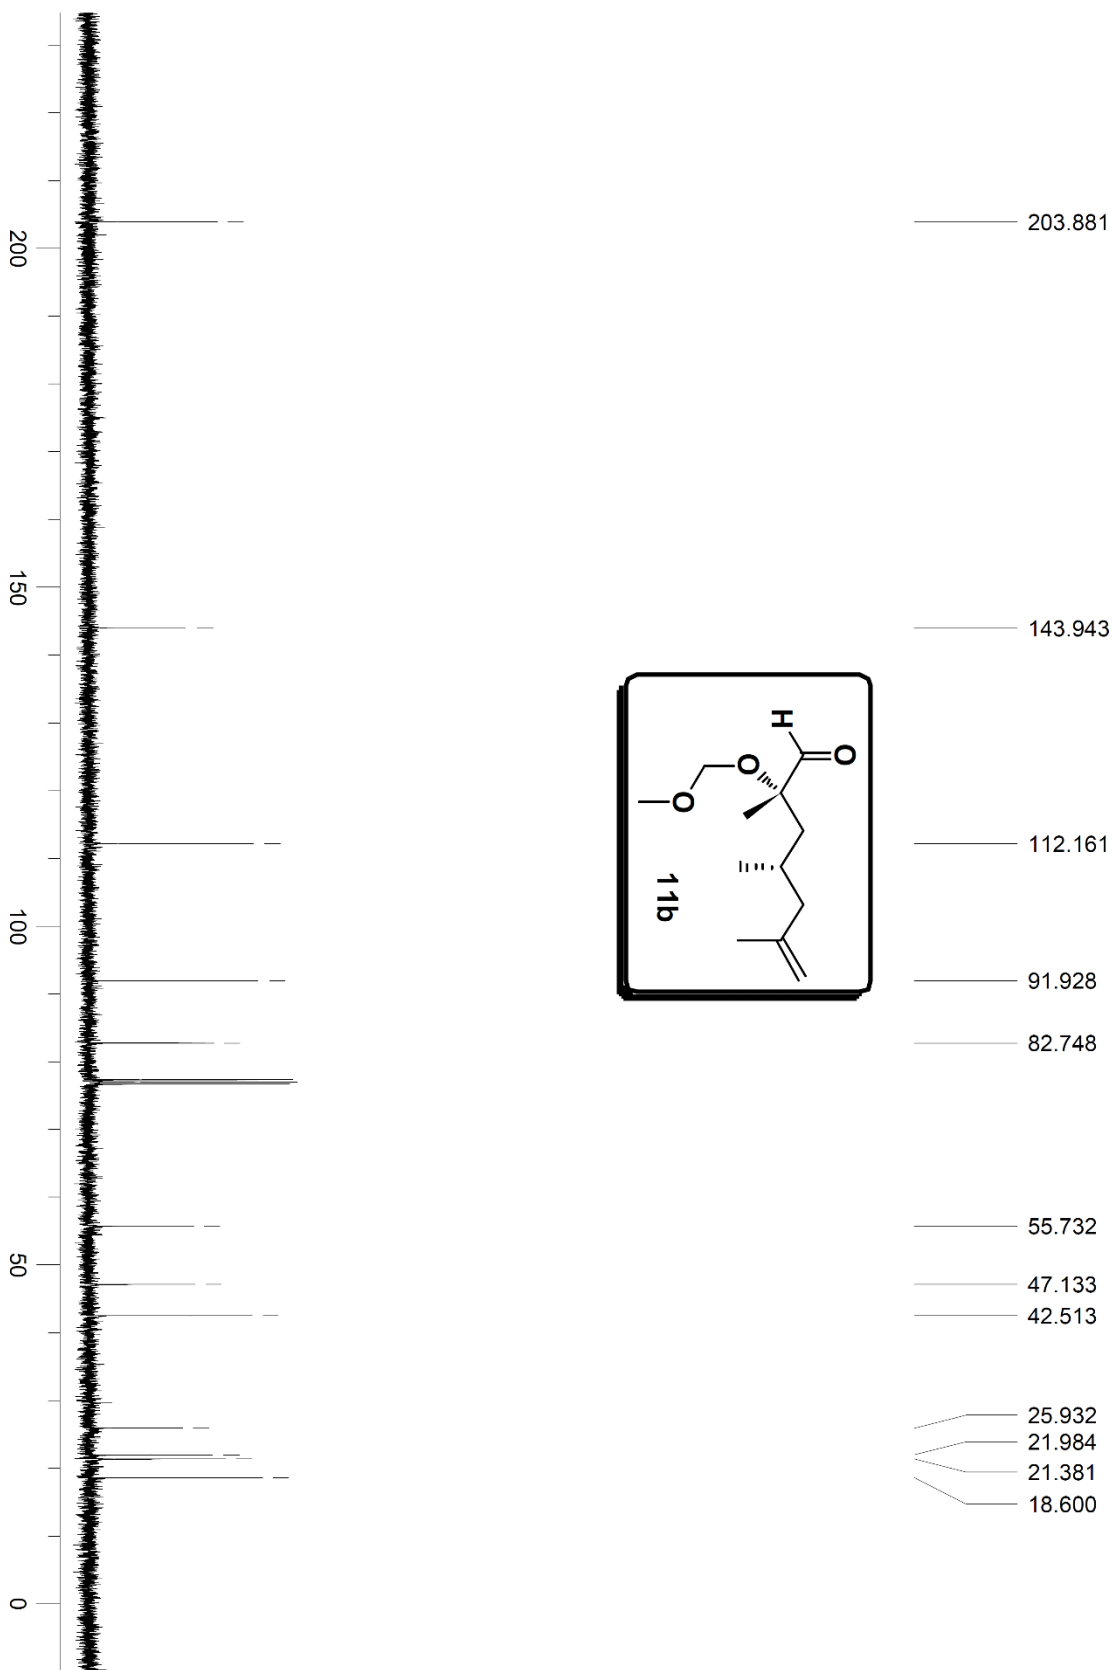

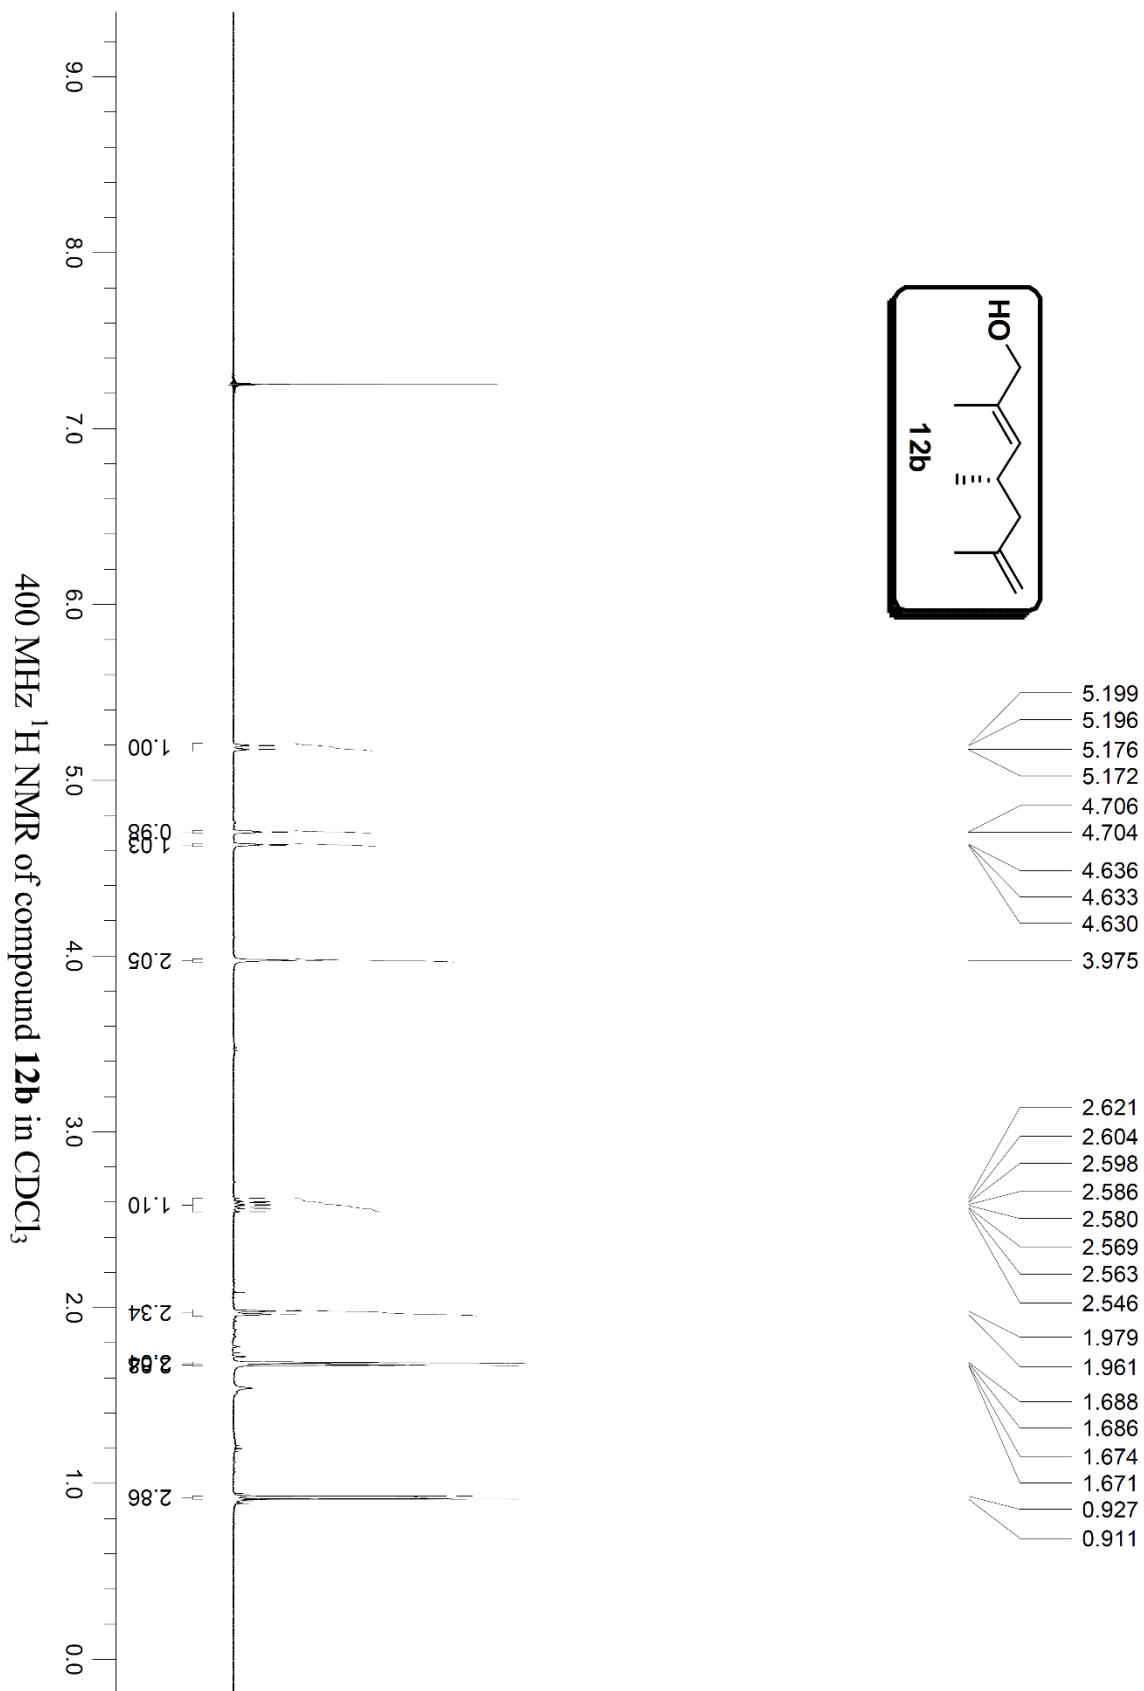

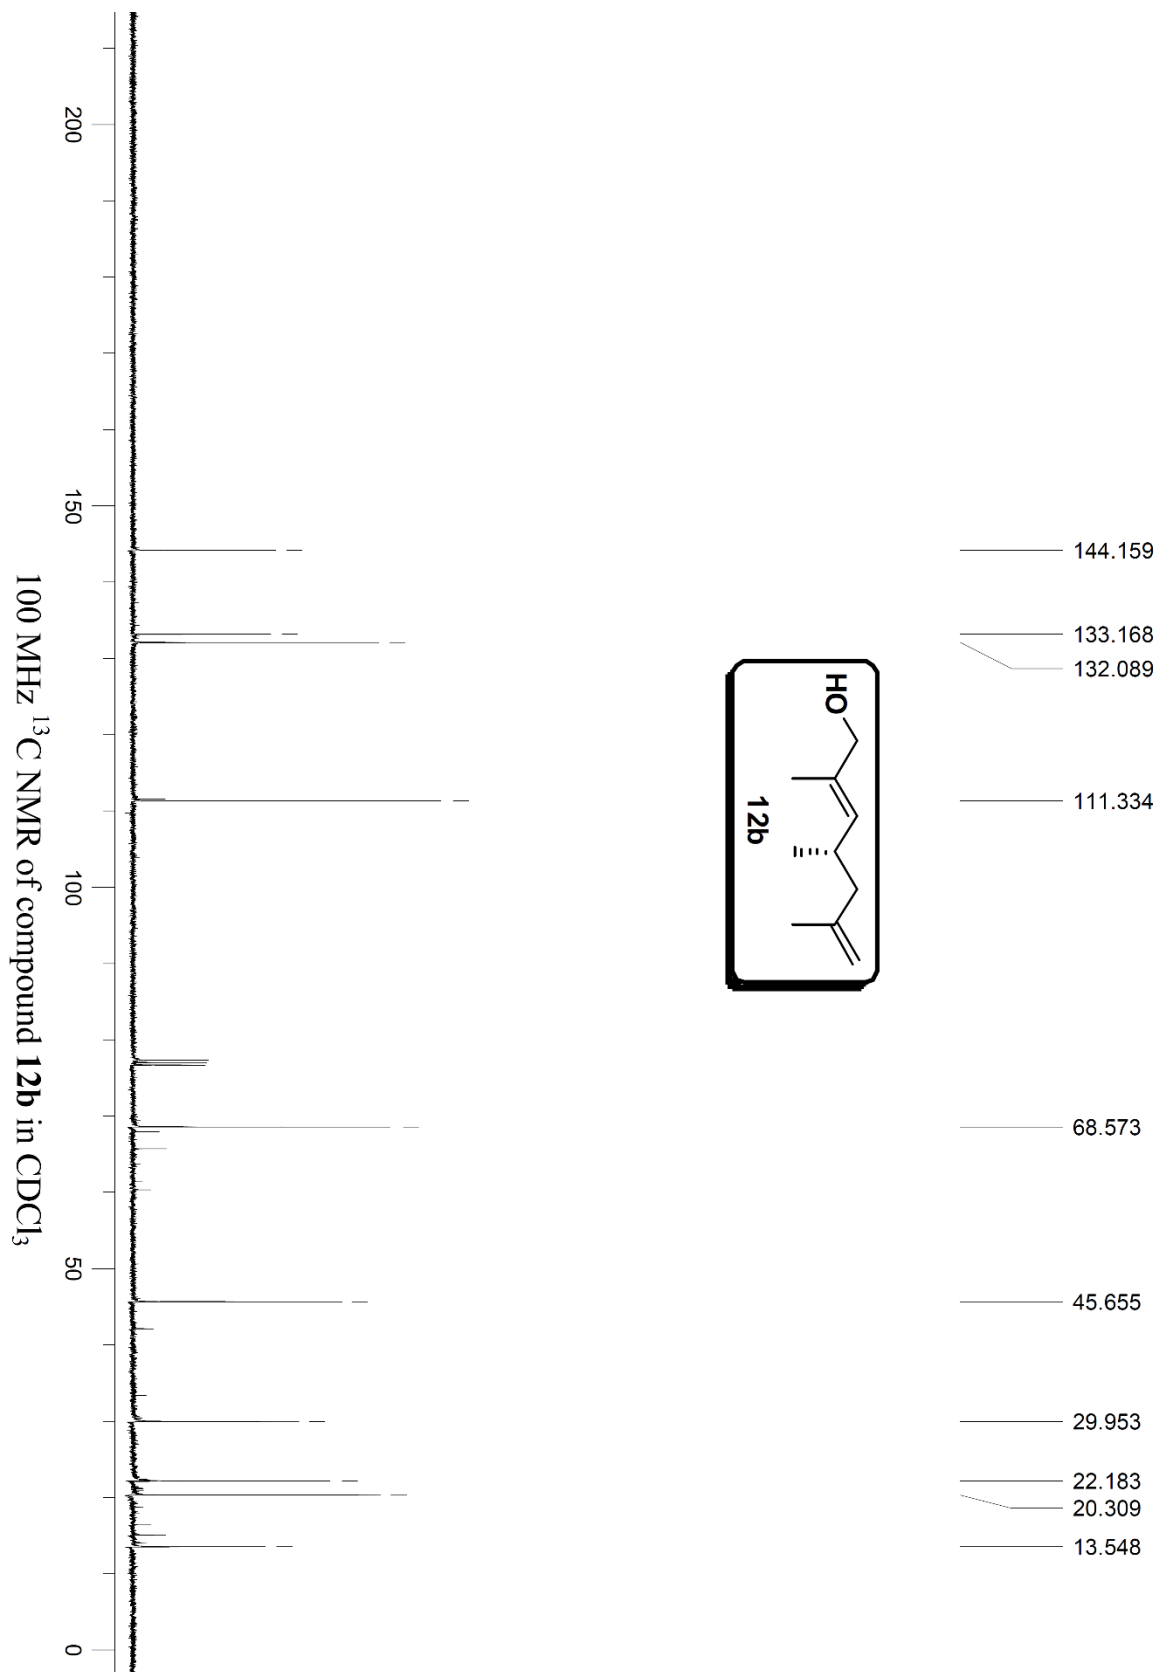



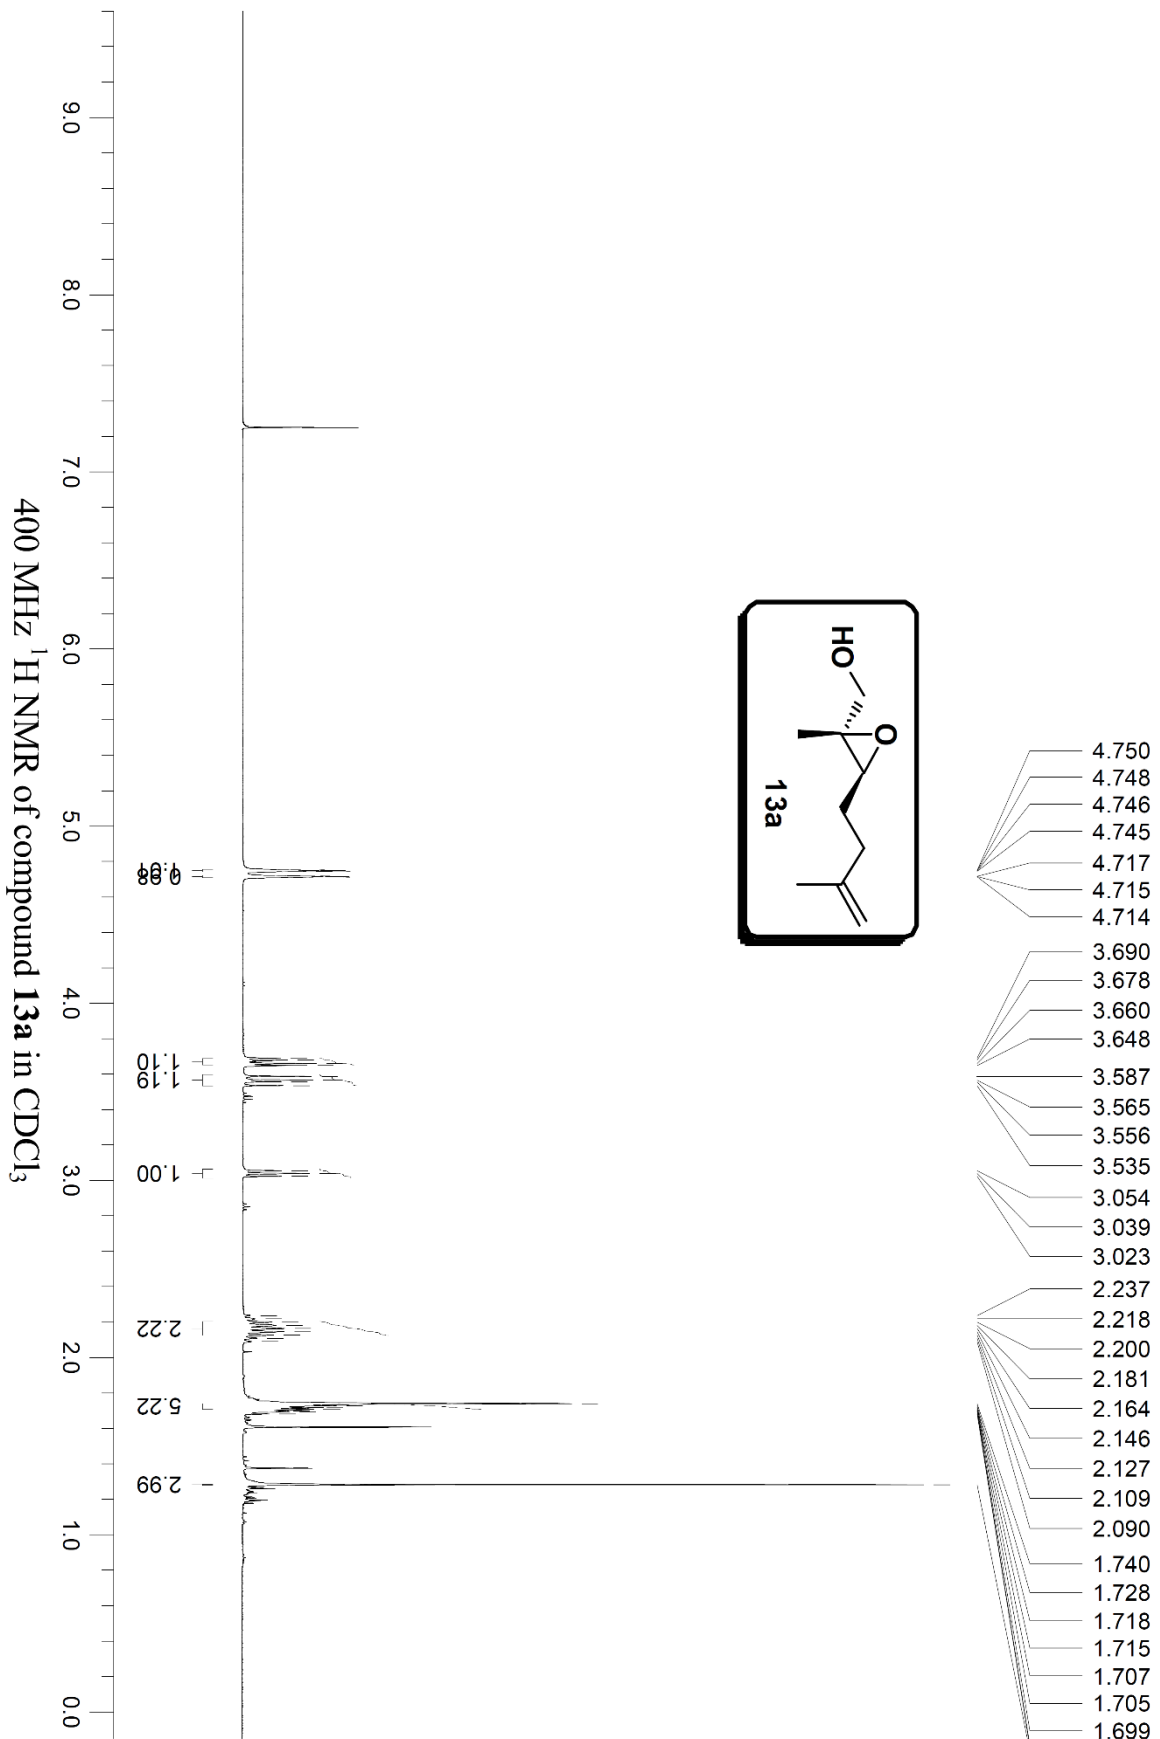

100 MHz  $^{13}\text{C}$  NMR of compound **13a** in  $\text{CDCl}_3$

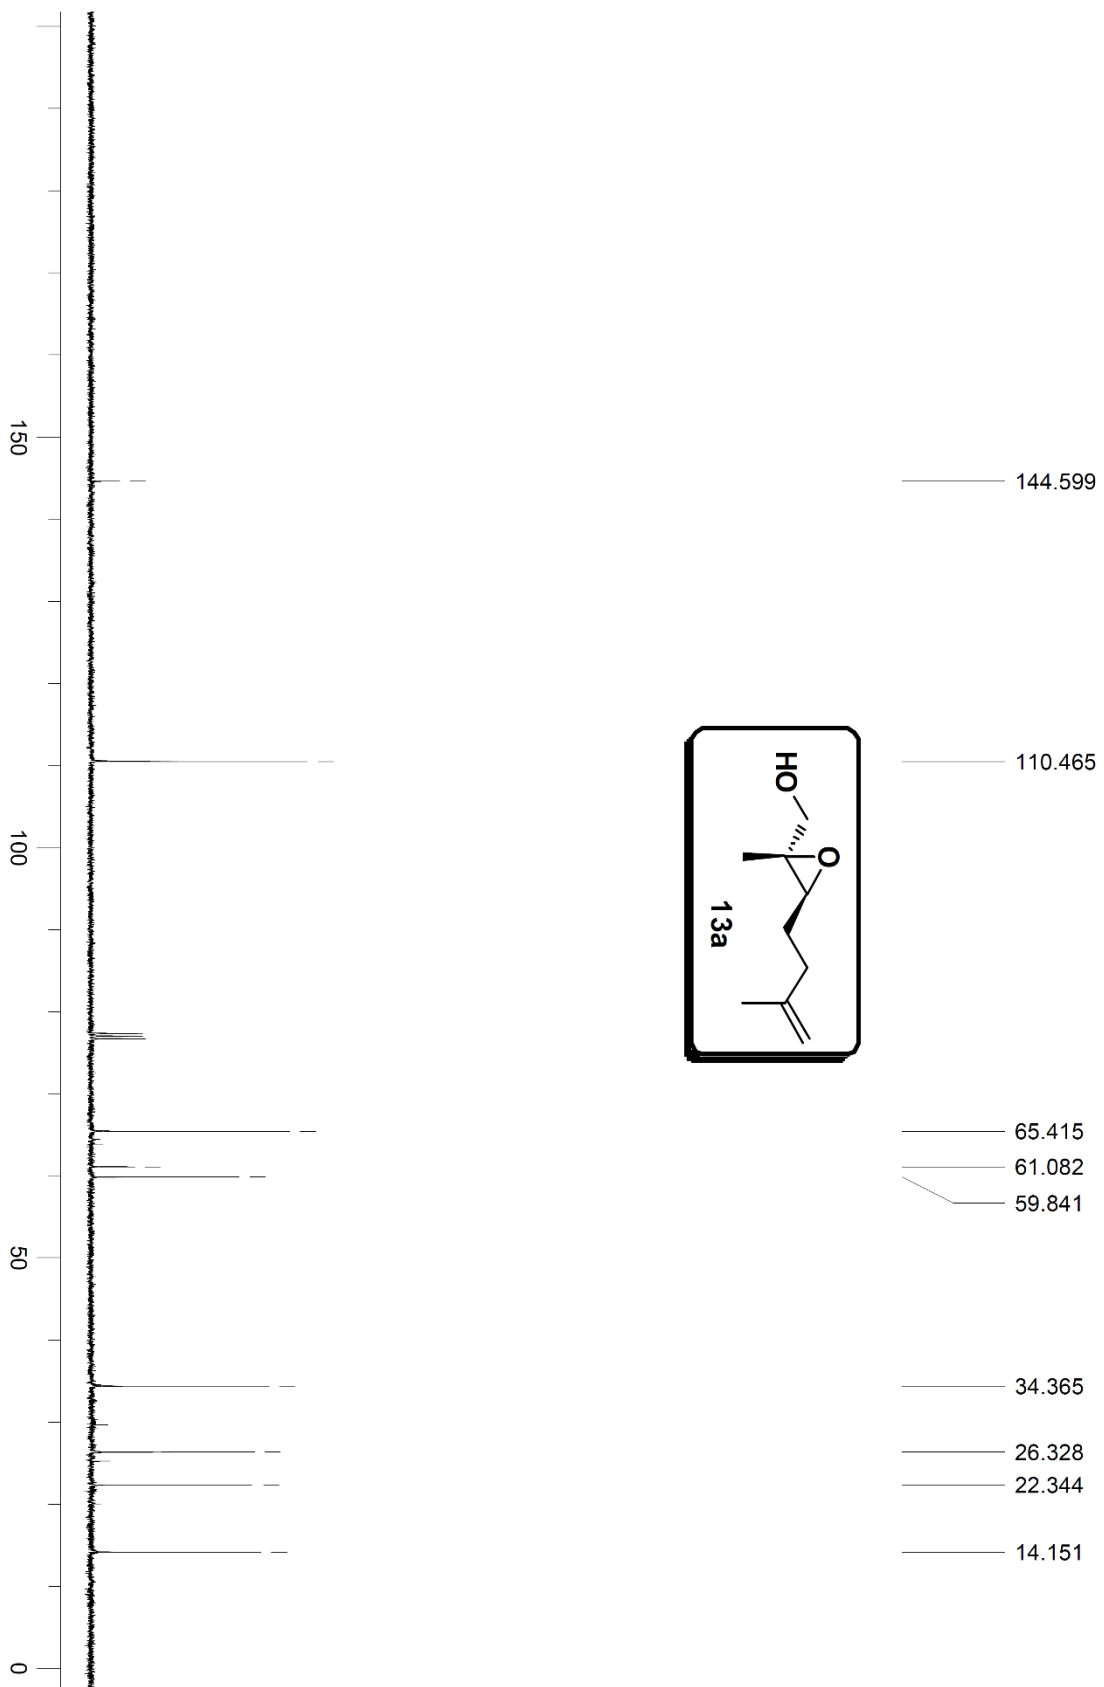

400 MHz <sup>1</sup>H NMR of compound **13b** in CDCl<sub>3</sub>

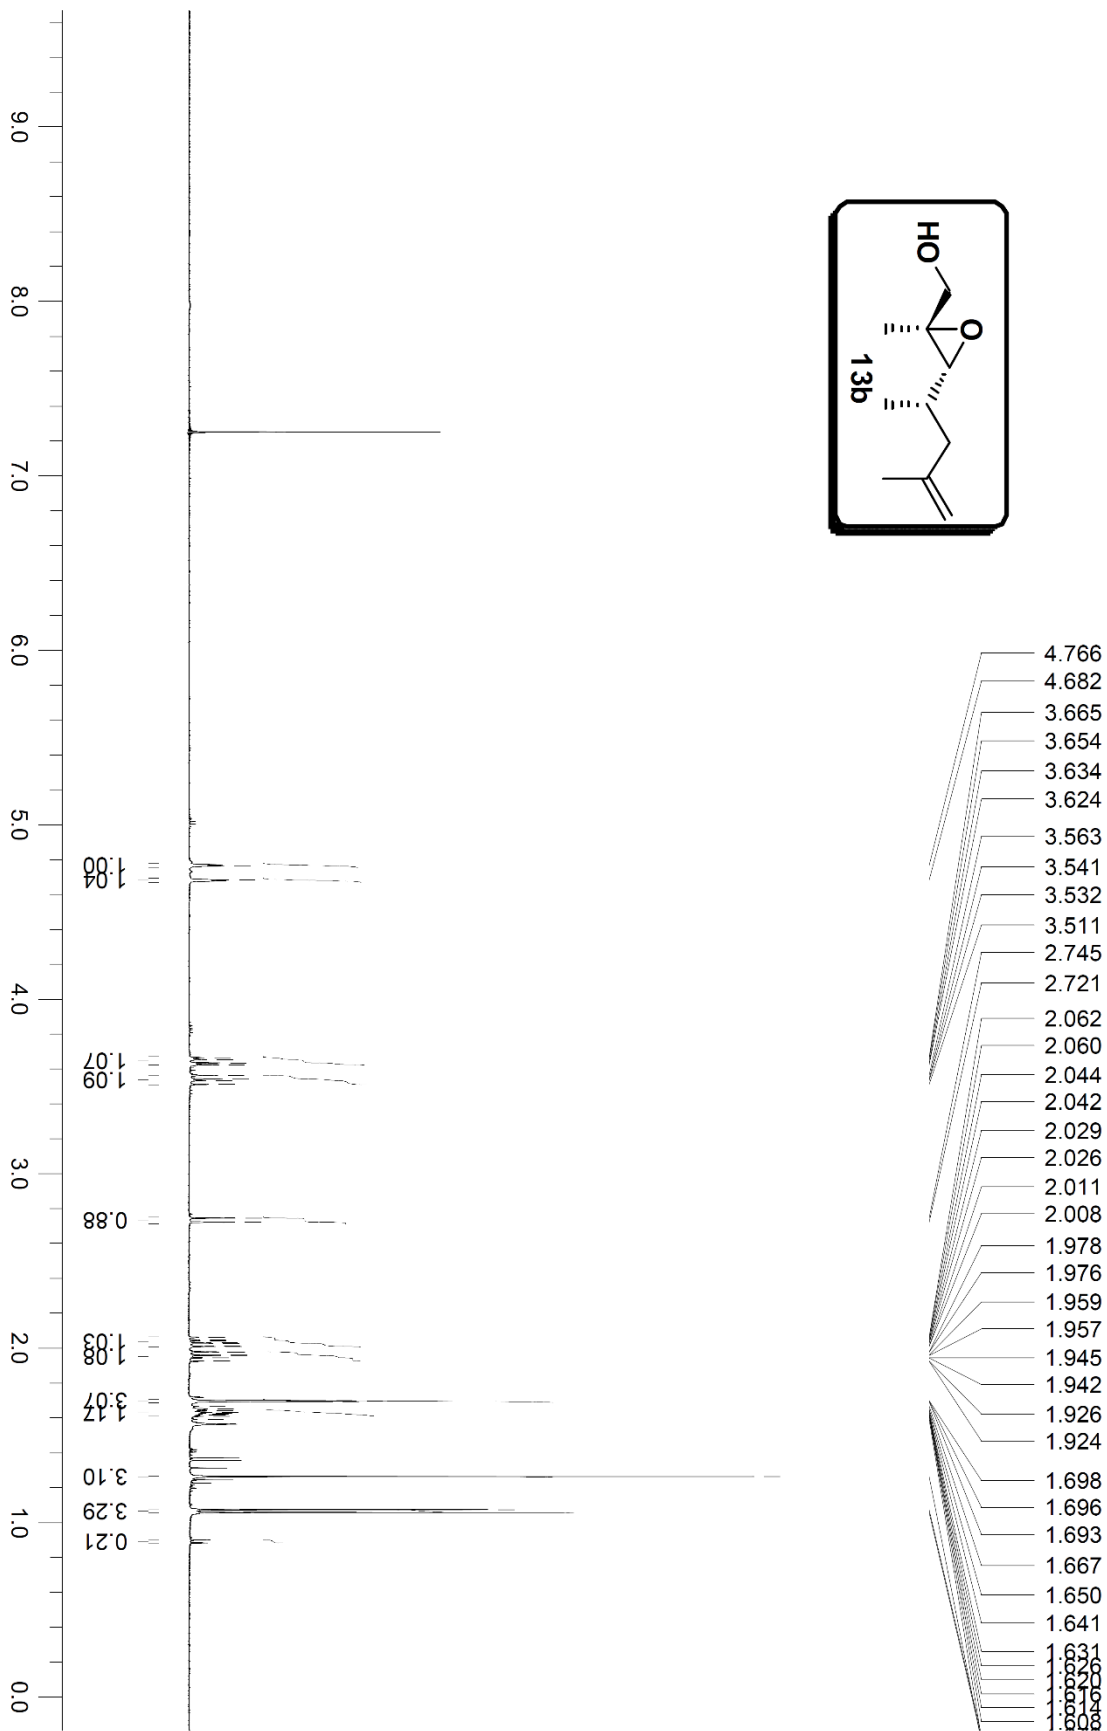

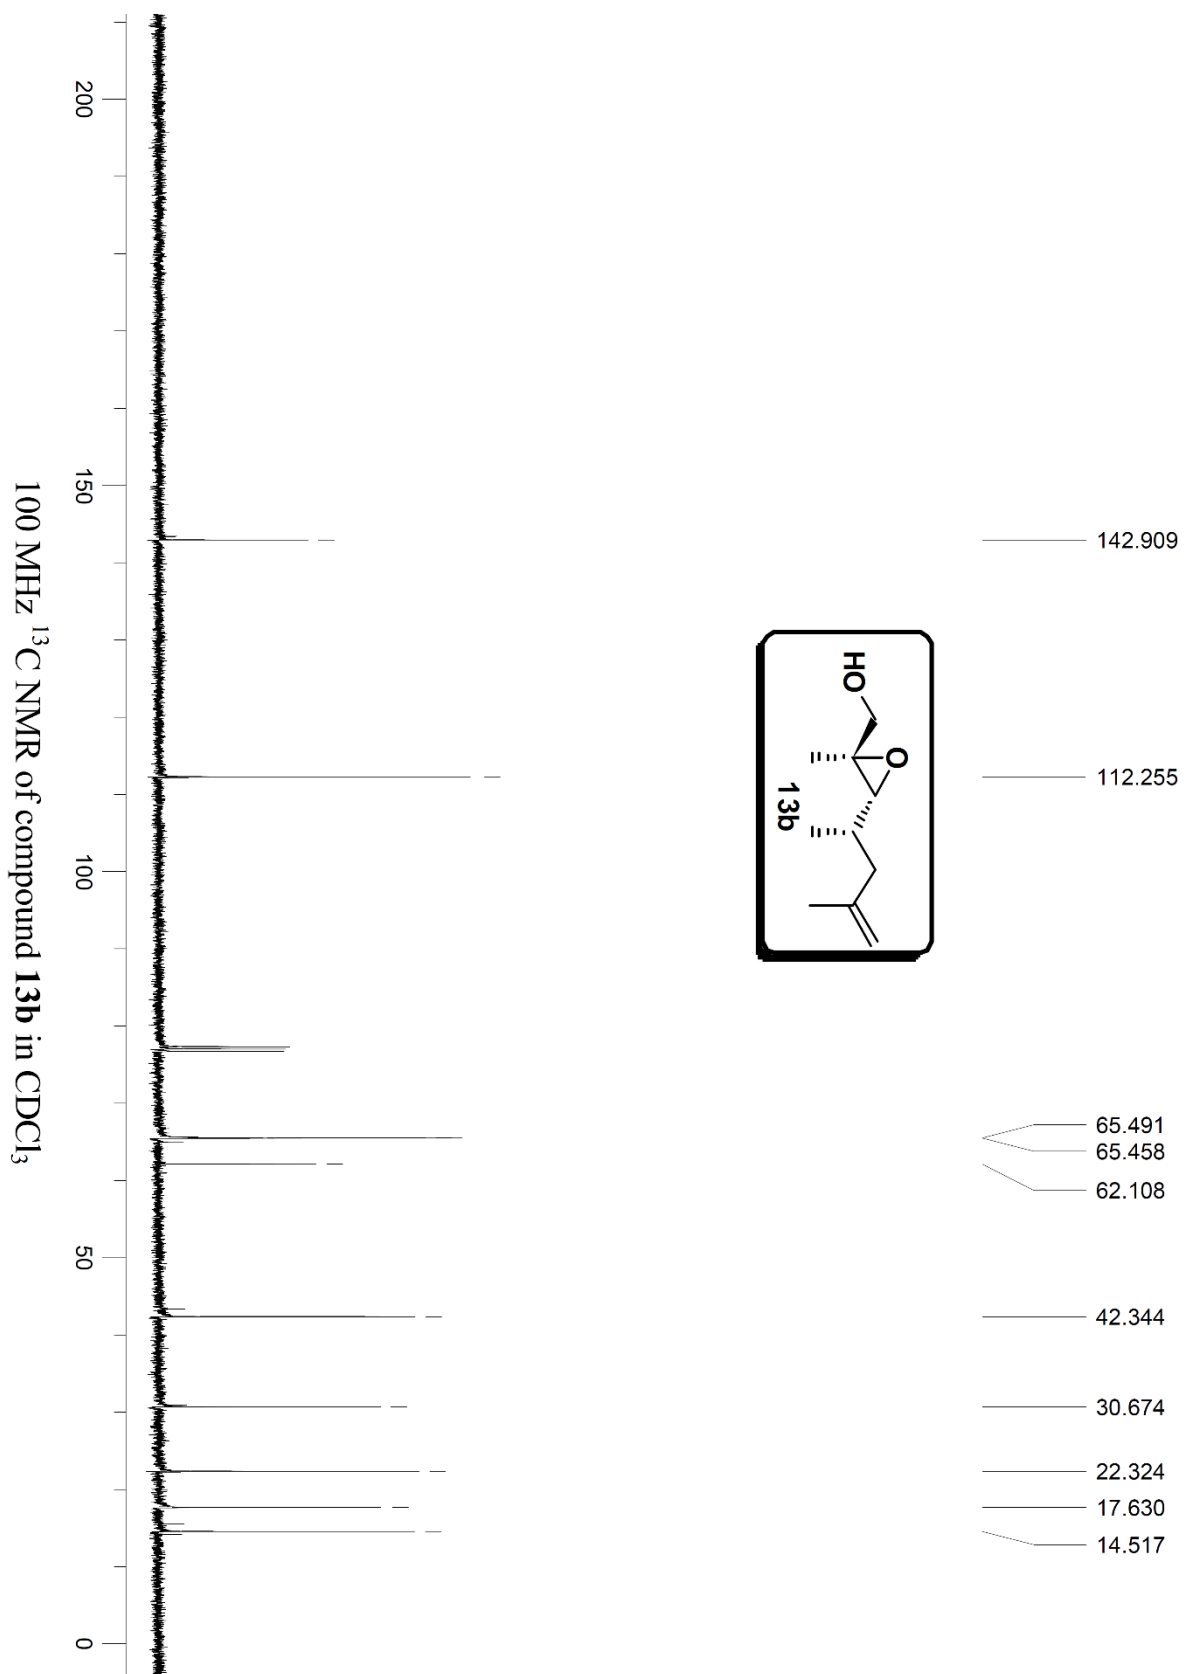

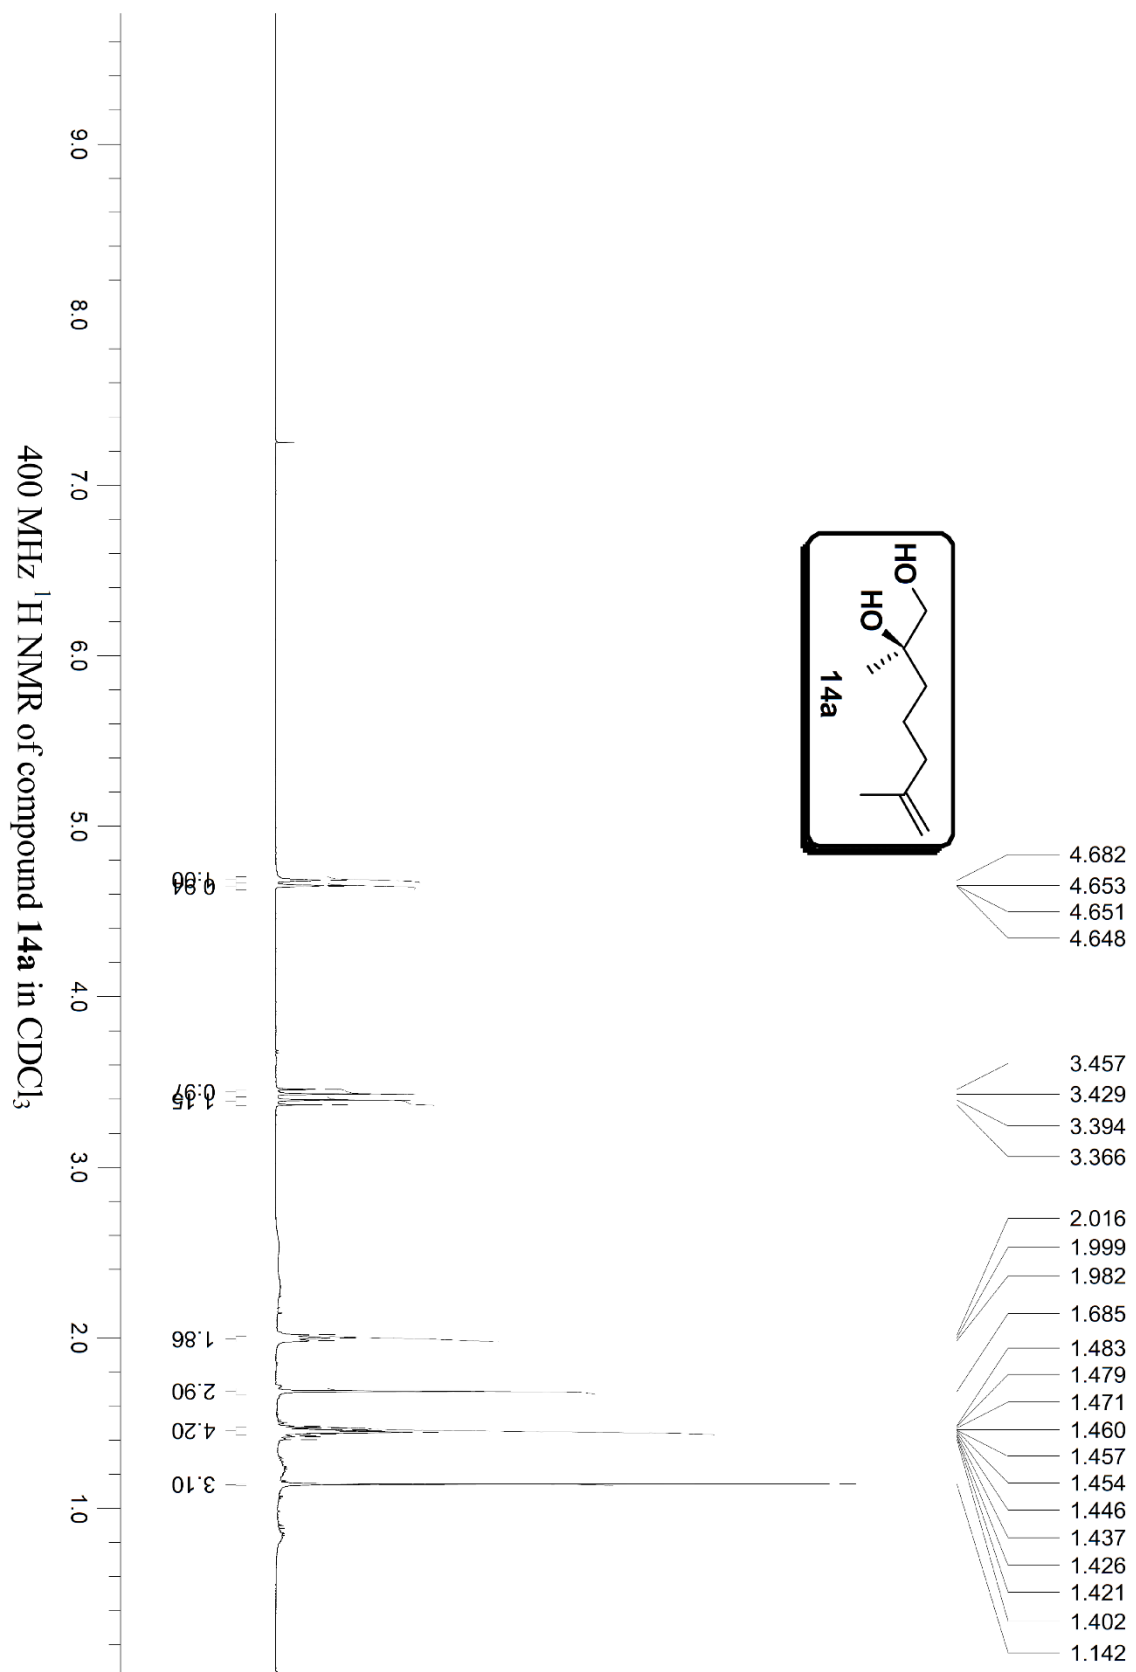

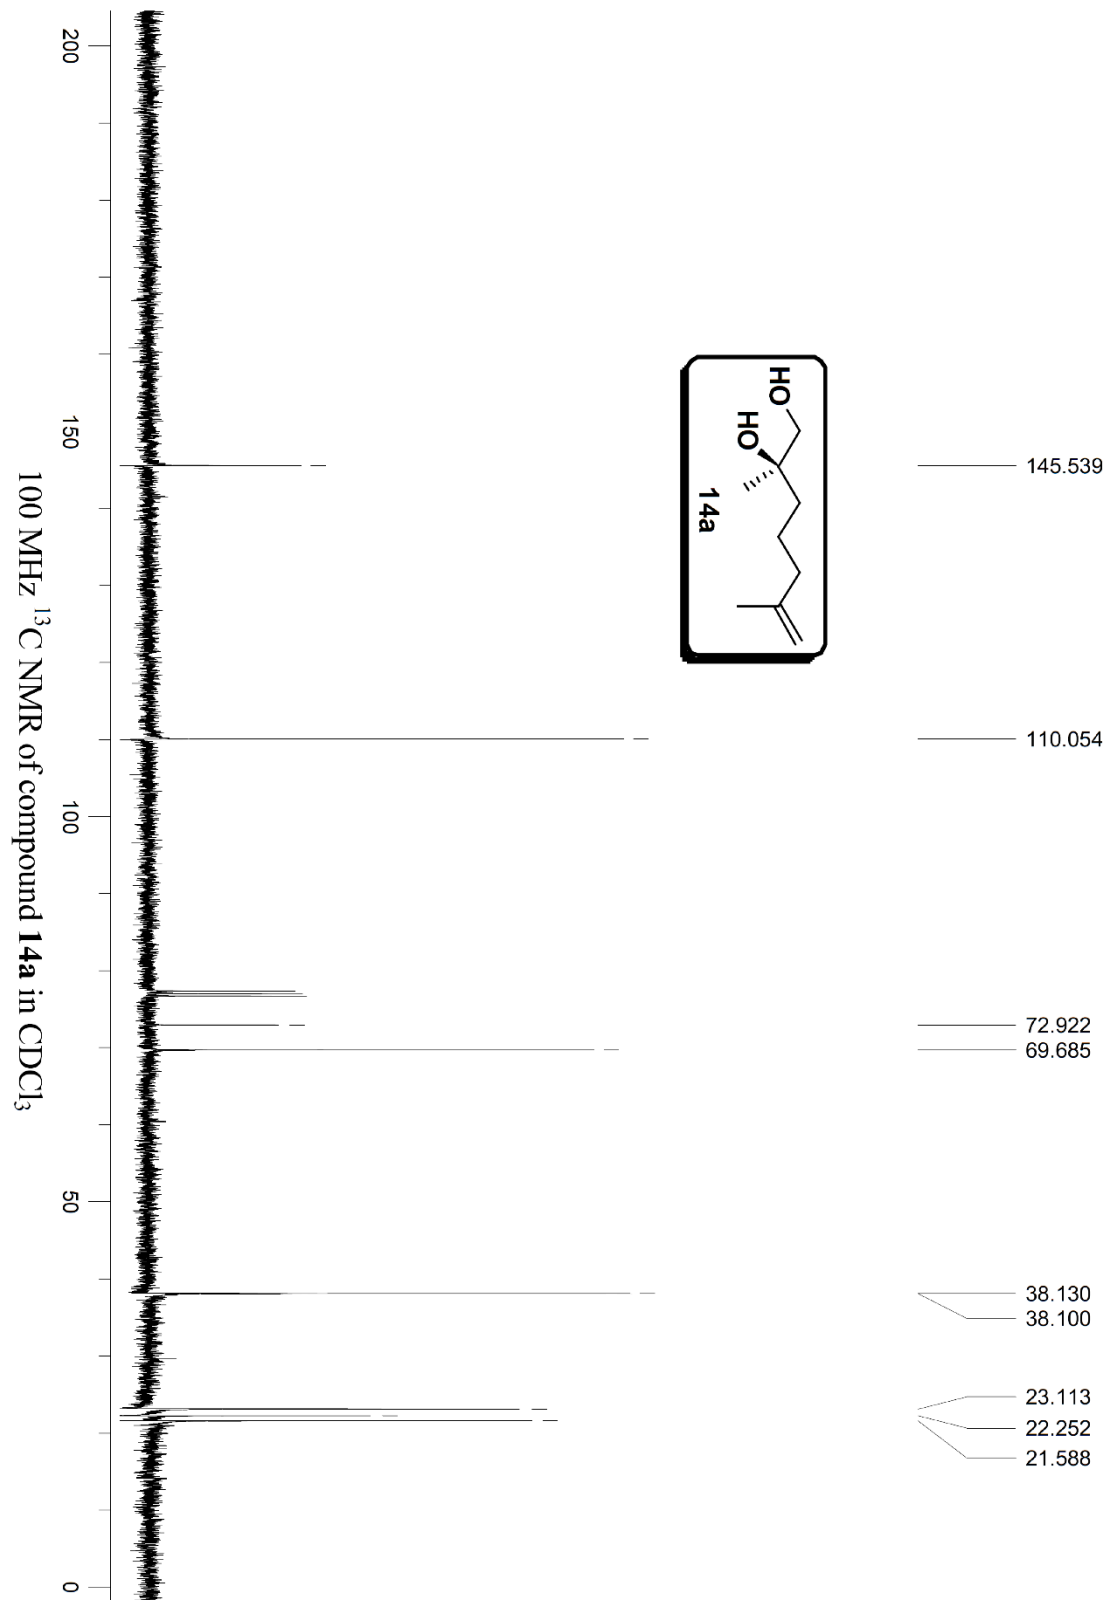

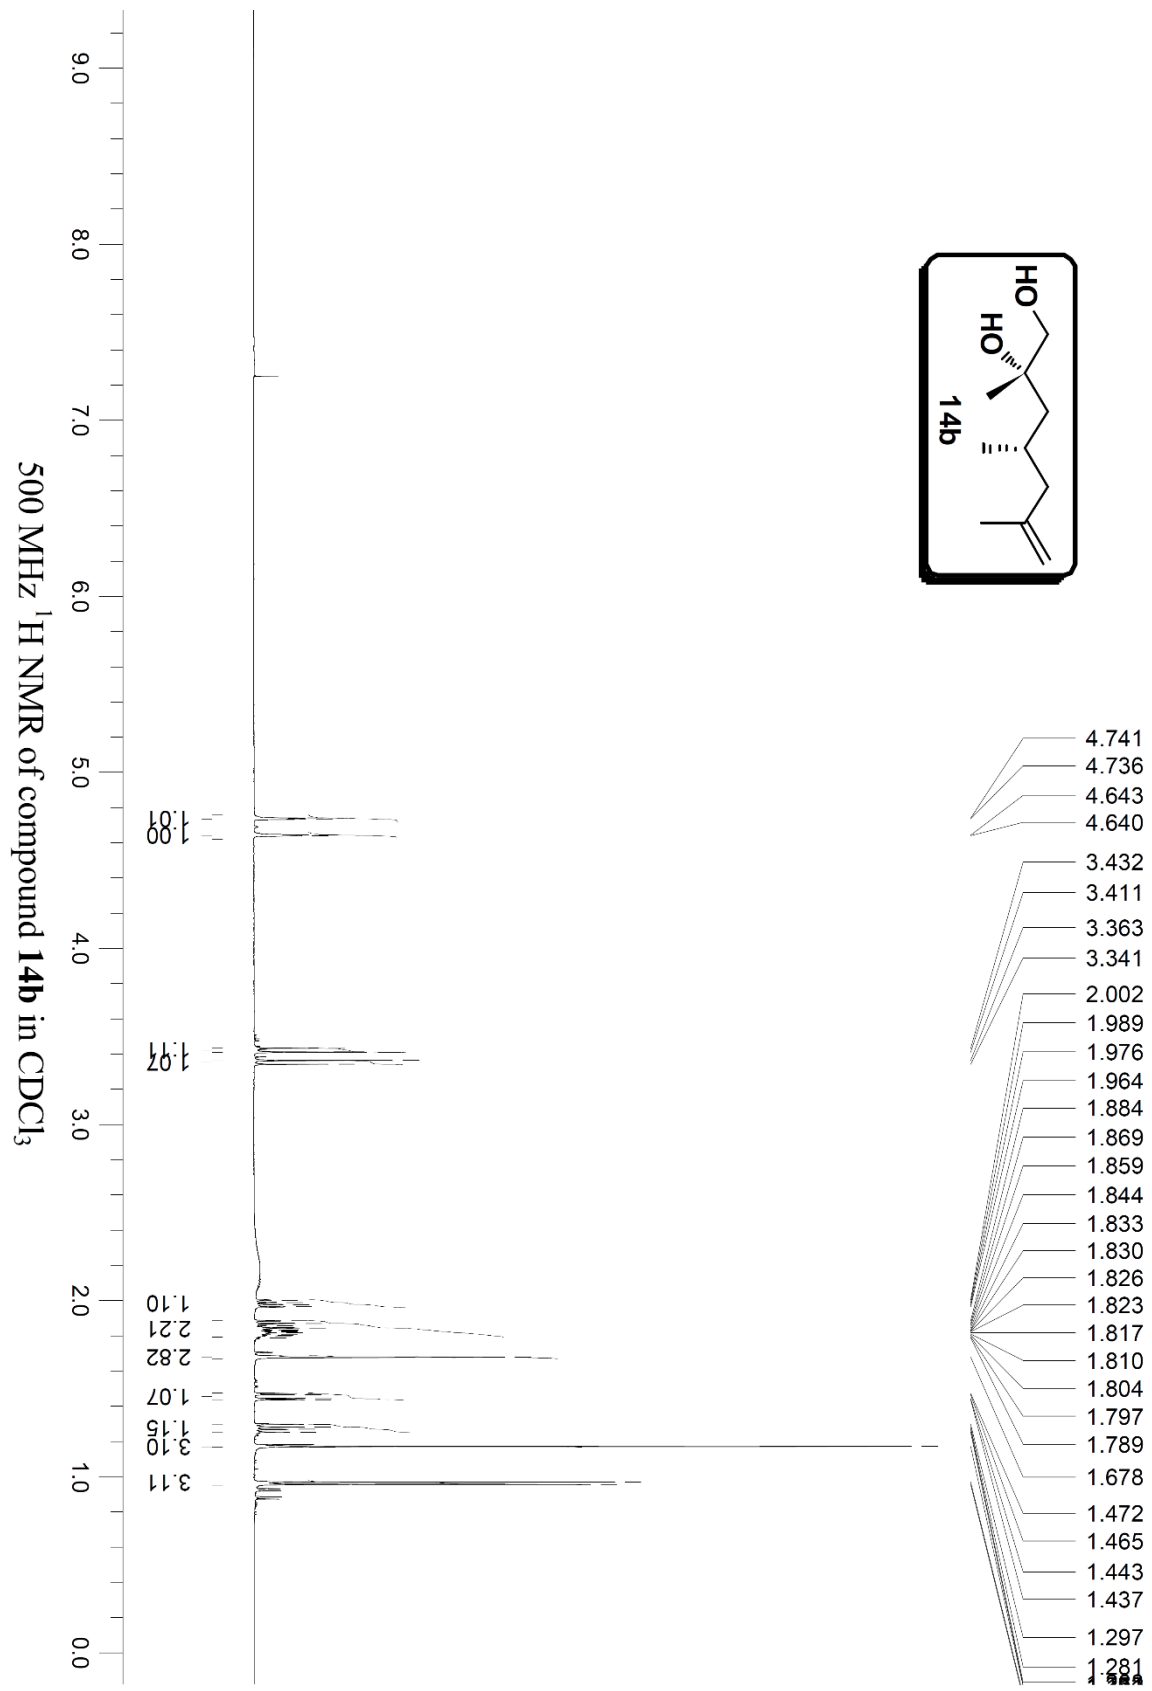

125 MHz  $^{13}\text{C}$  NMR of compound **14b** in  $\text{CDCl}_3$

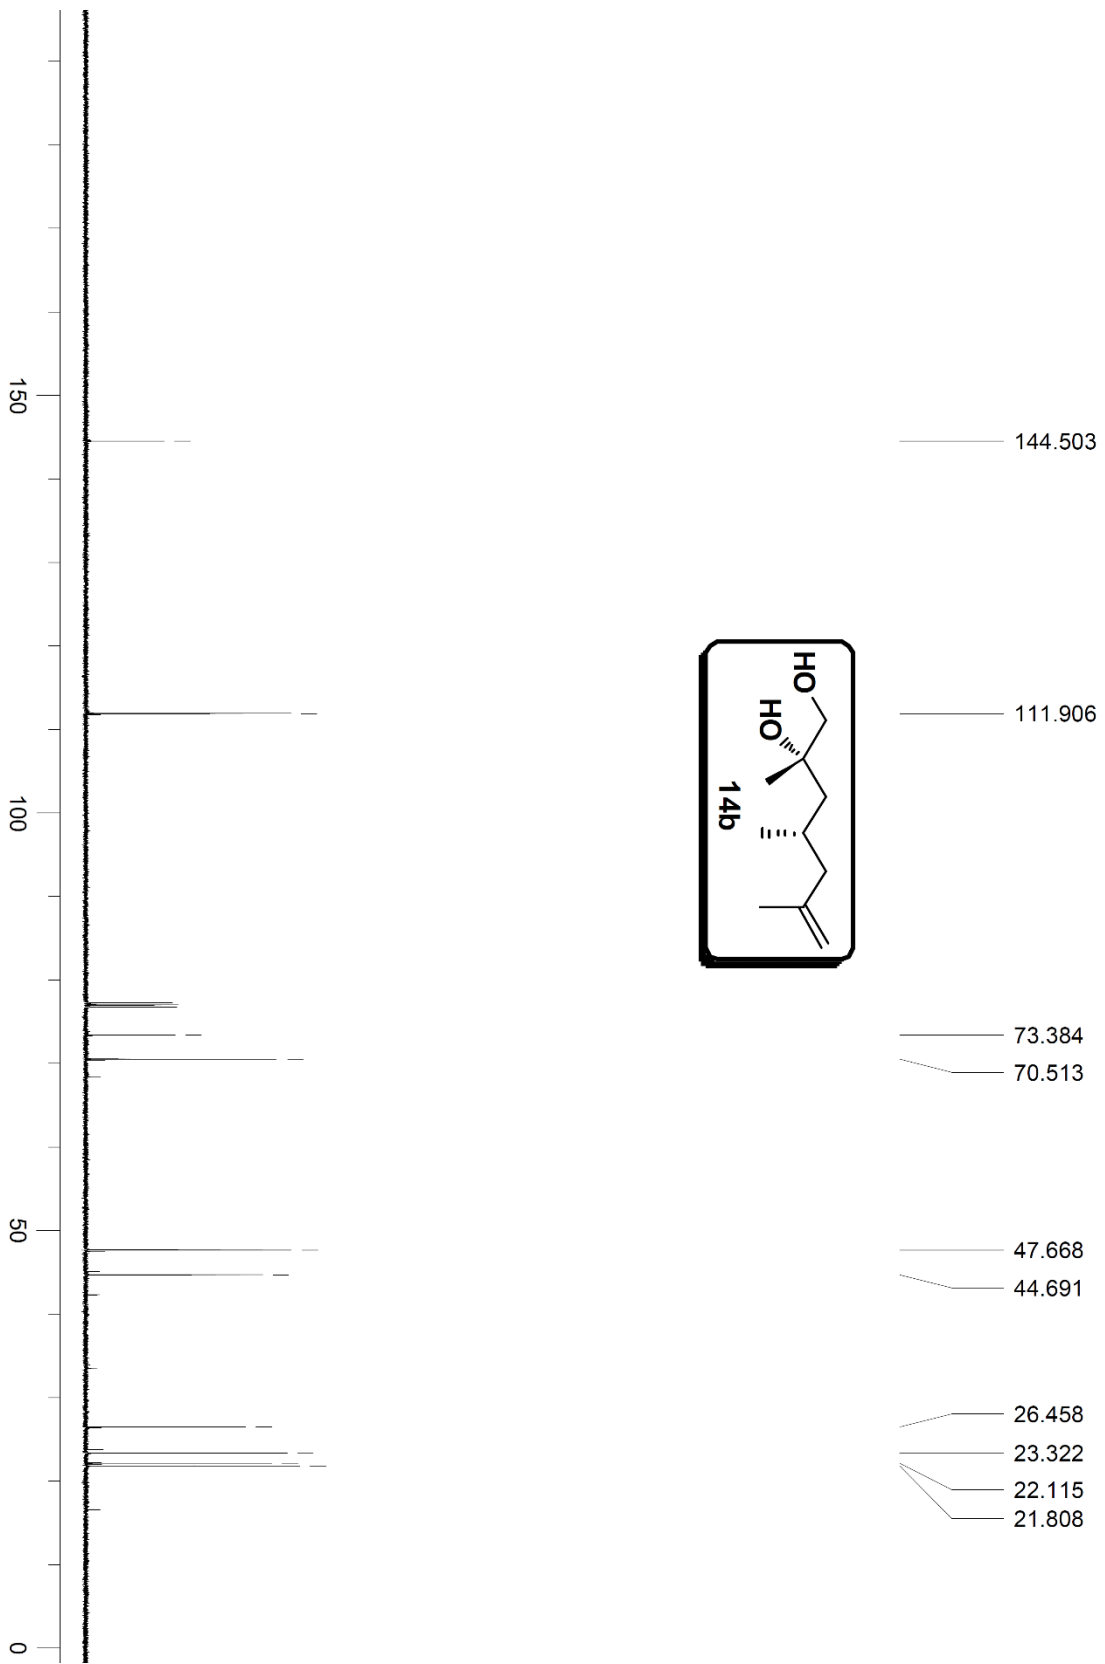



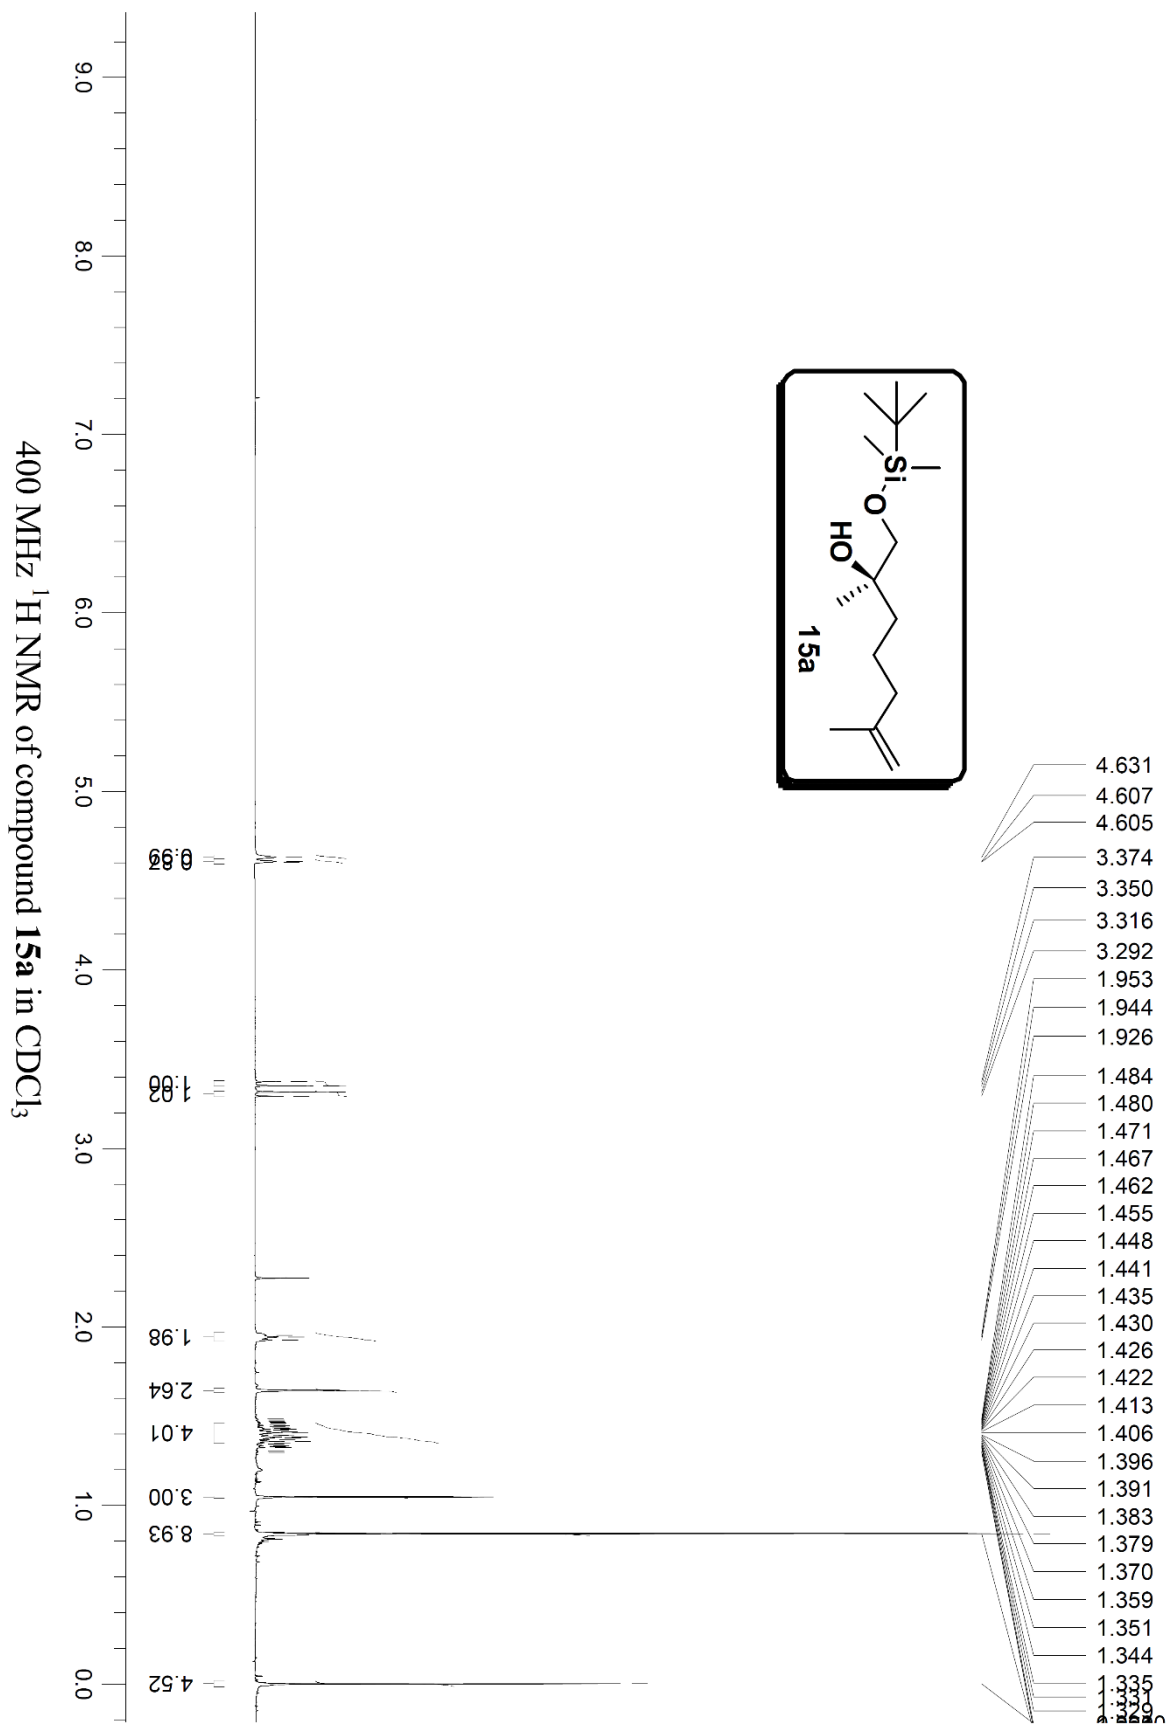

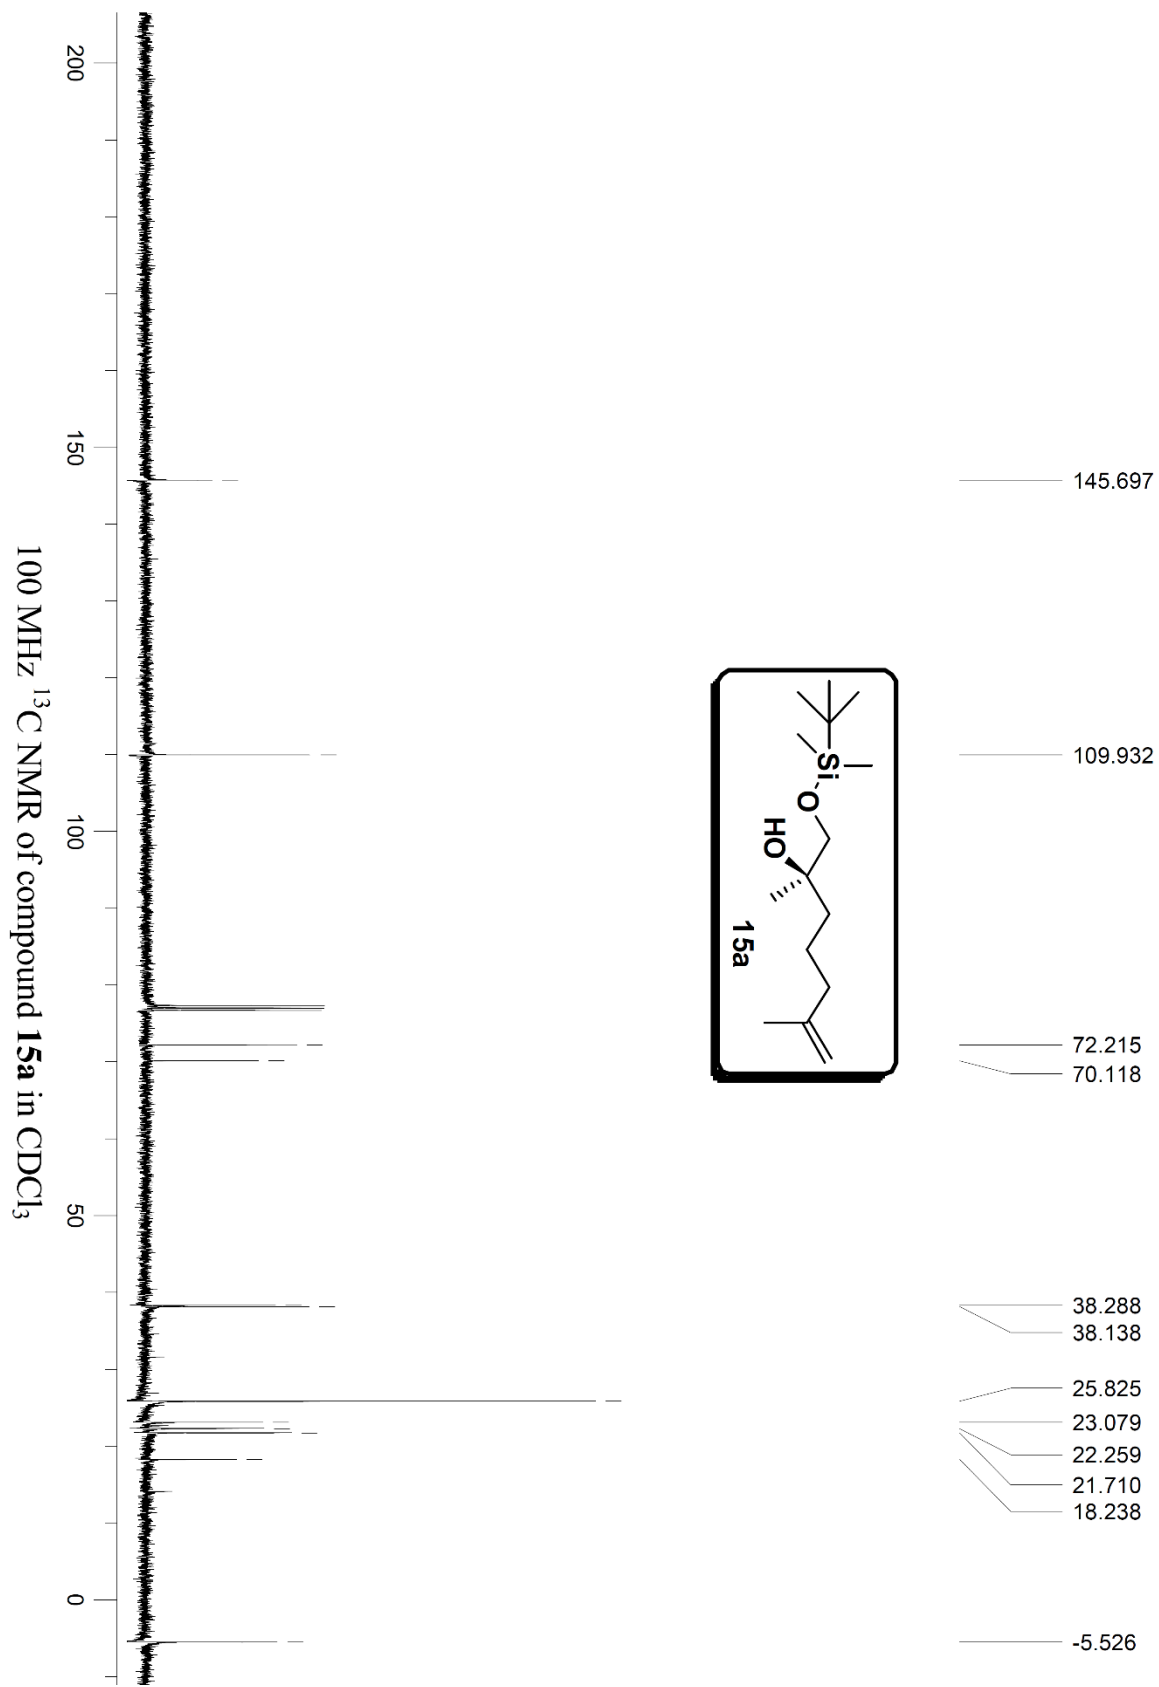



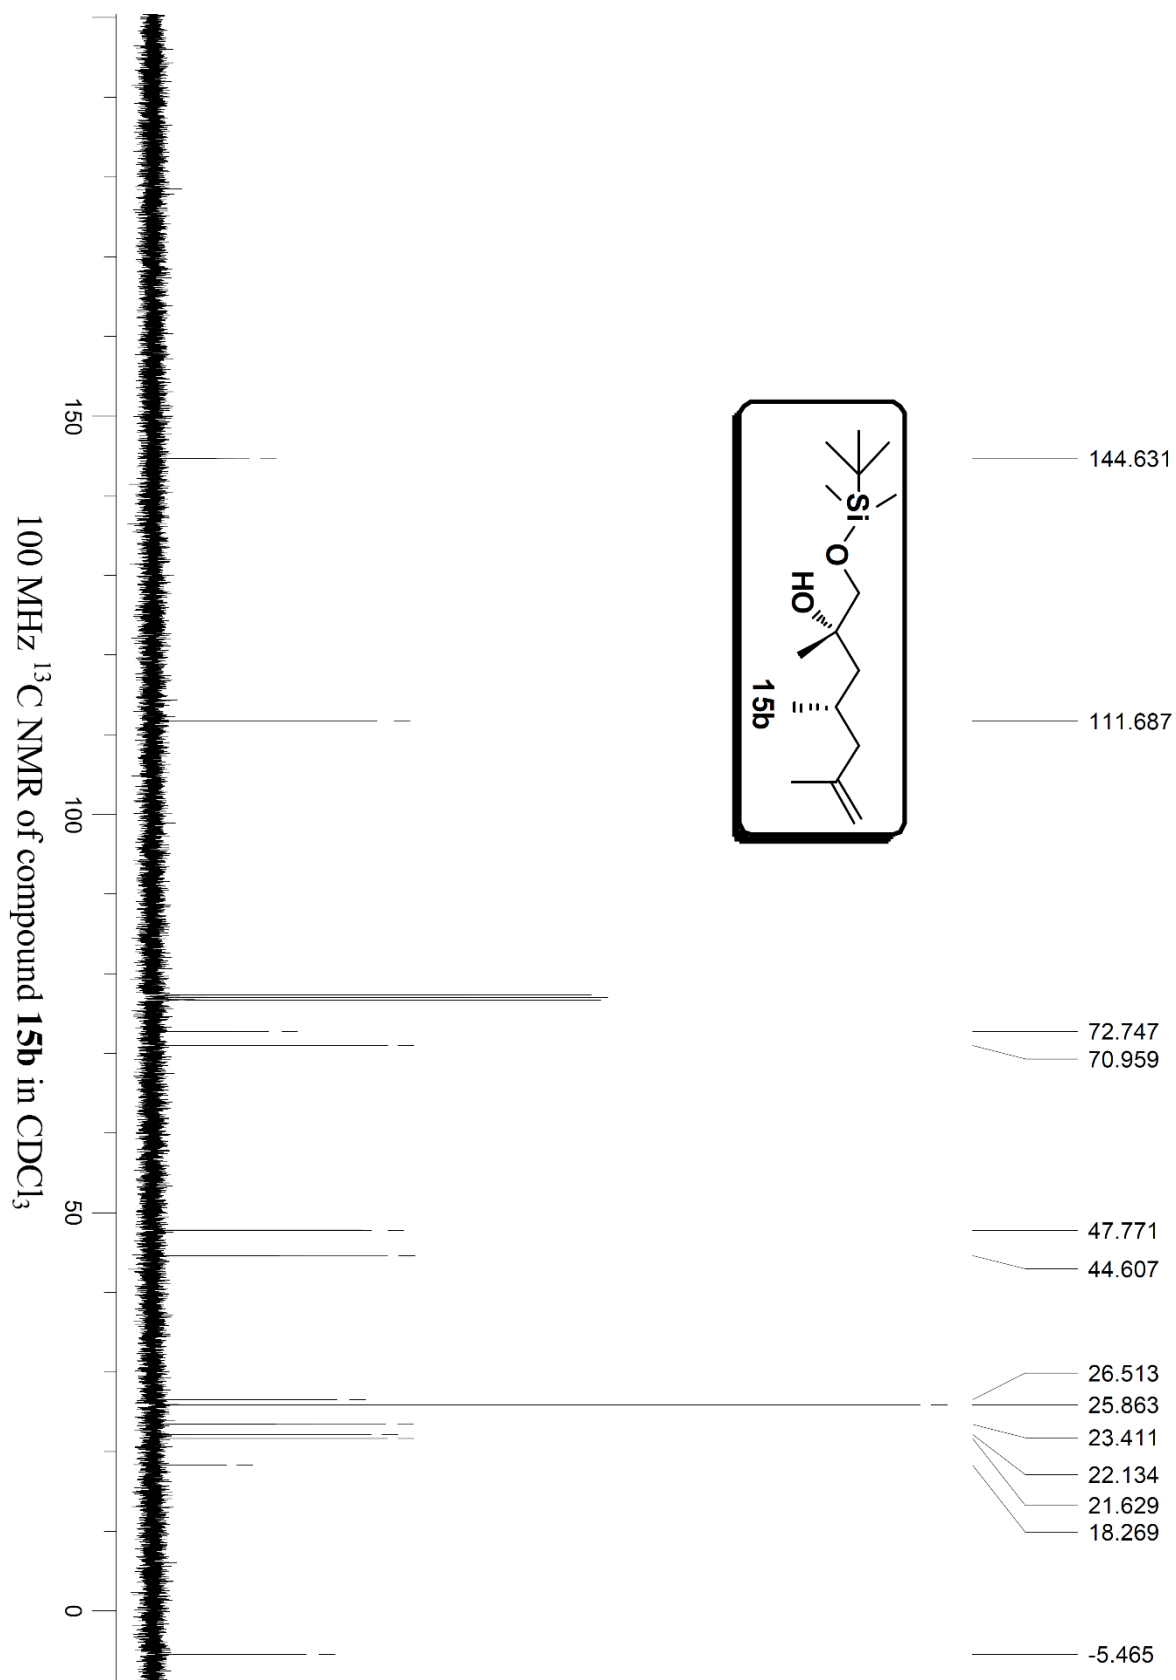

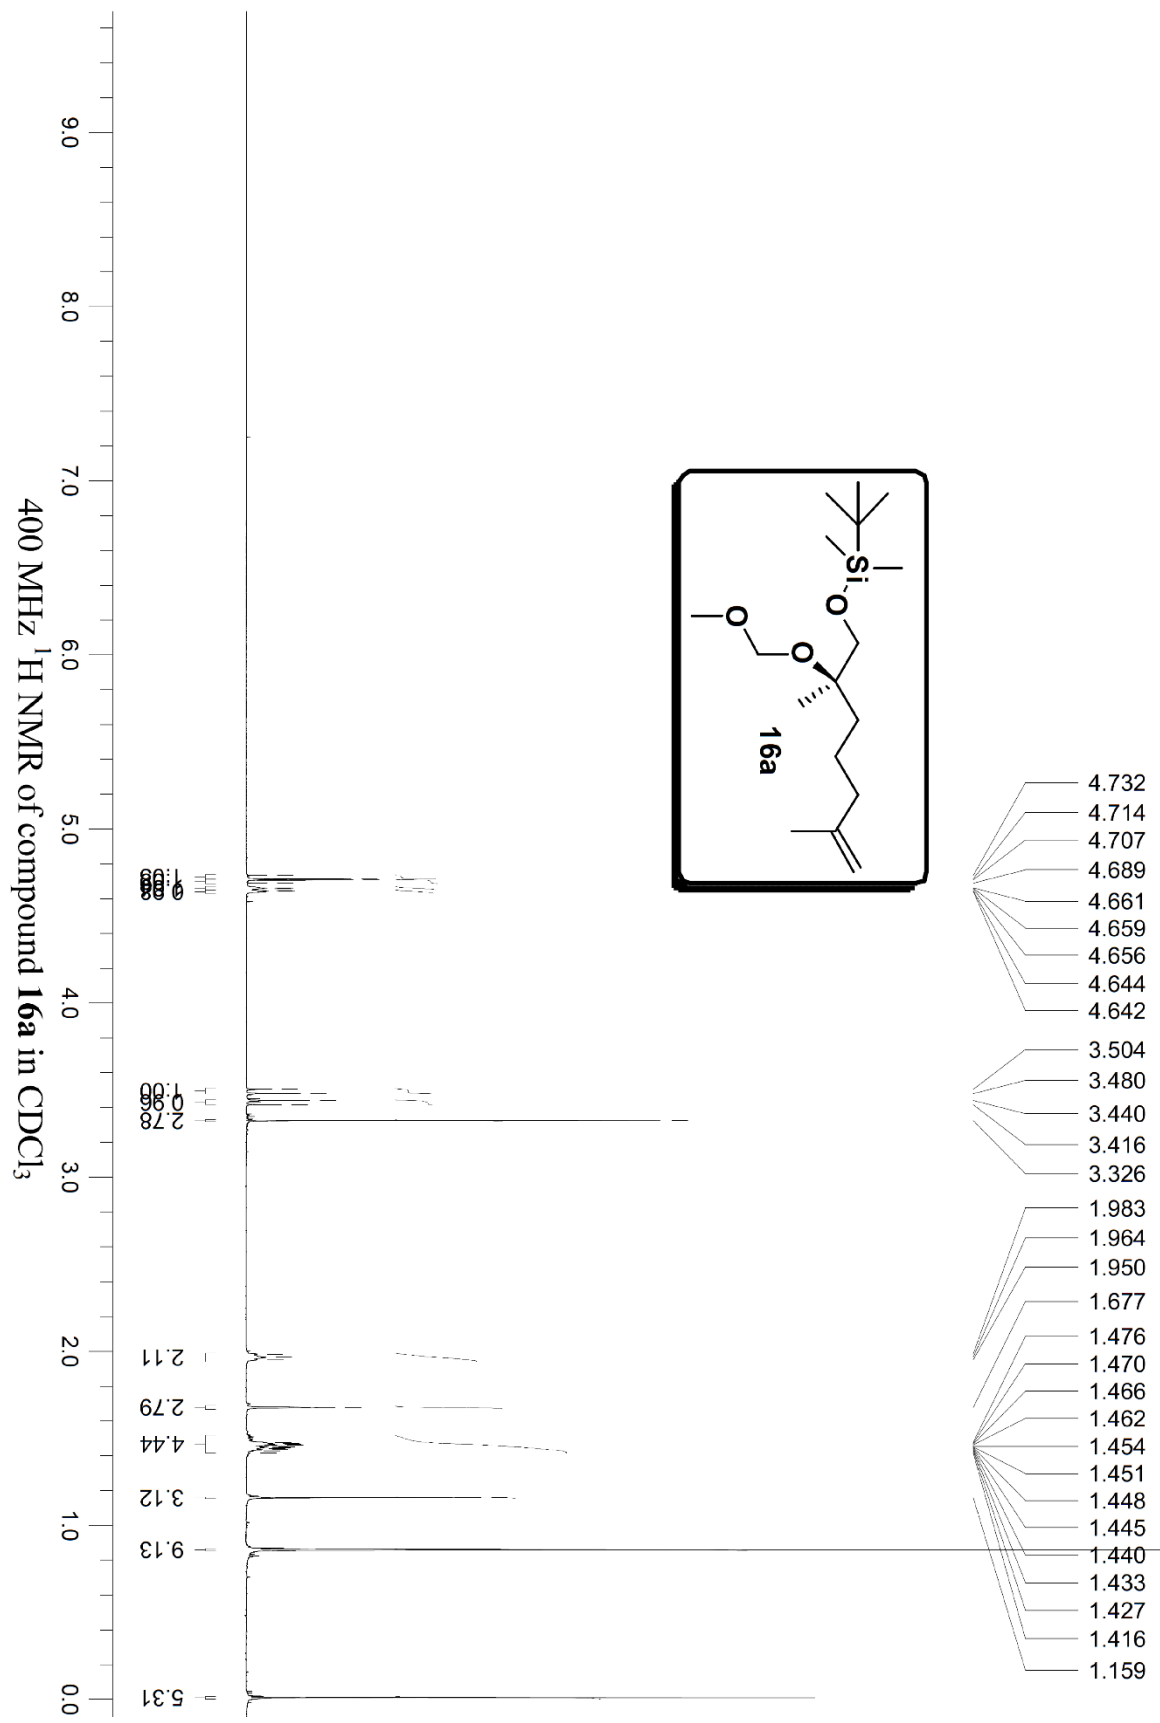

100 MHz  $^{13}\text{C}$  NMR of compound **16a** in  $\text{CDCl}_3$

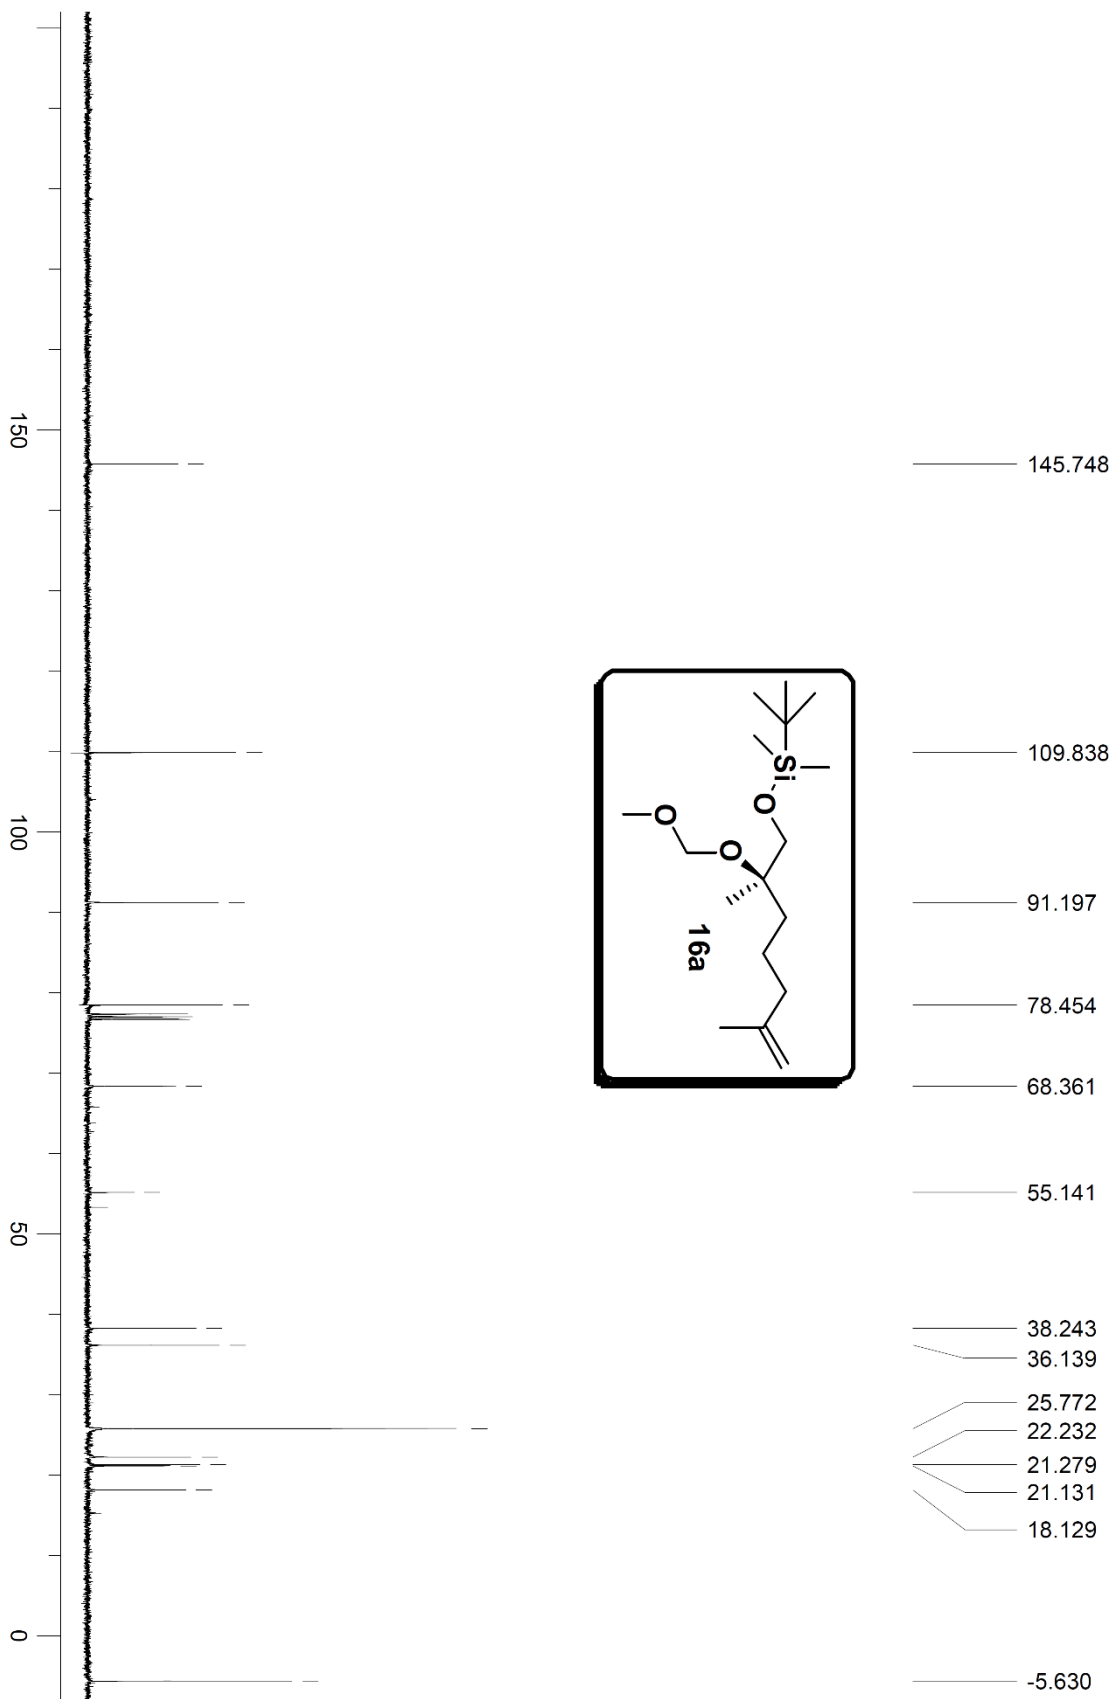

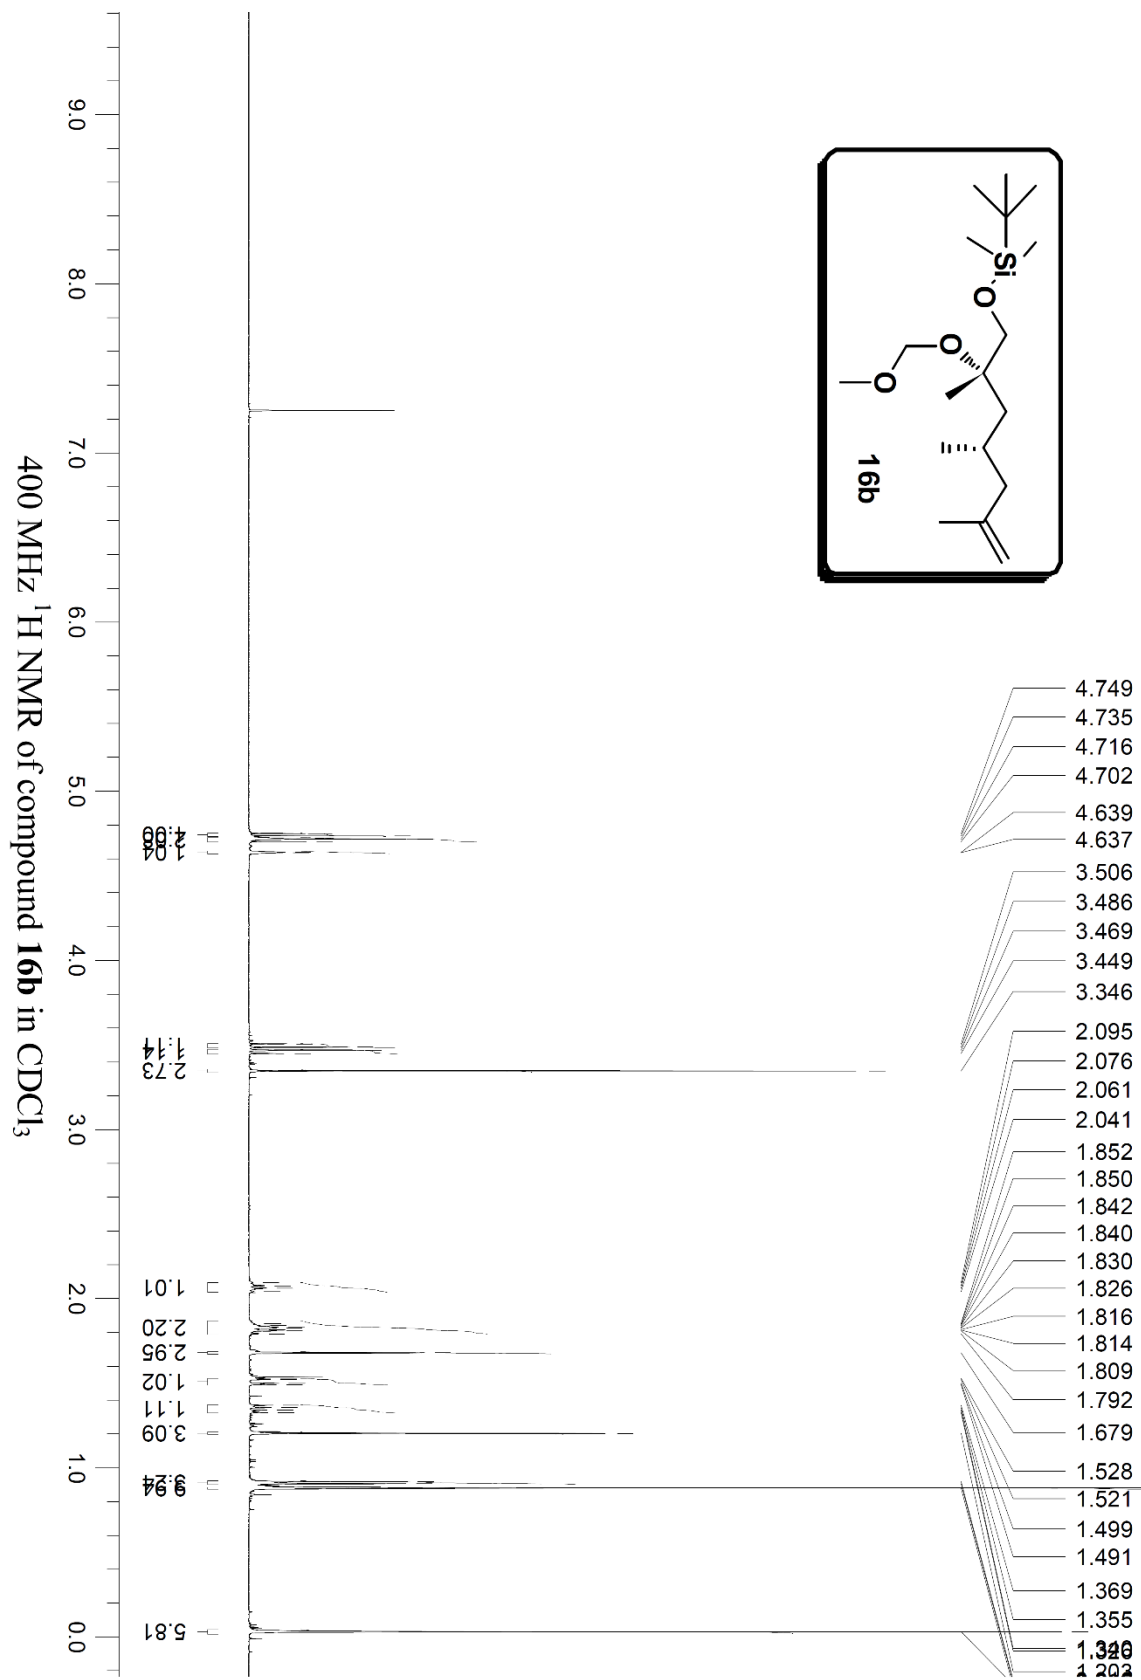

100 MHz  $^{13}\text{C}$  NMR of compound **16b** in  $\text{CDCl}_3$

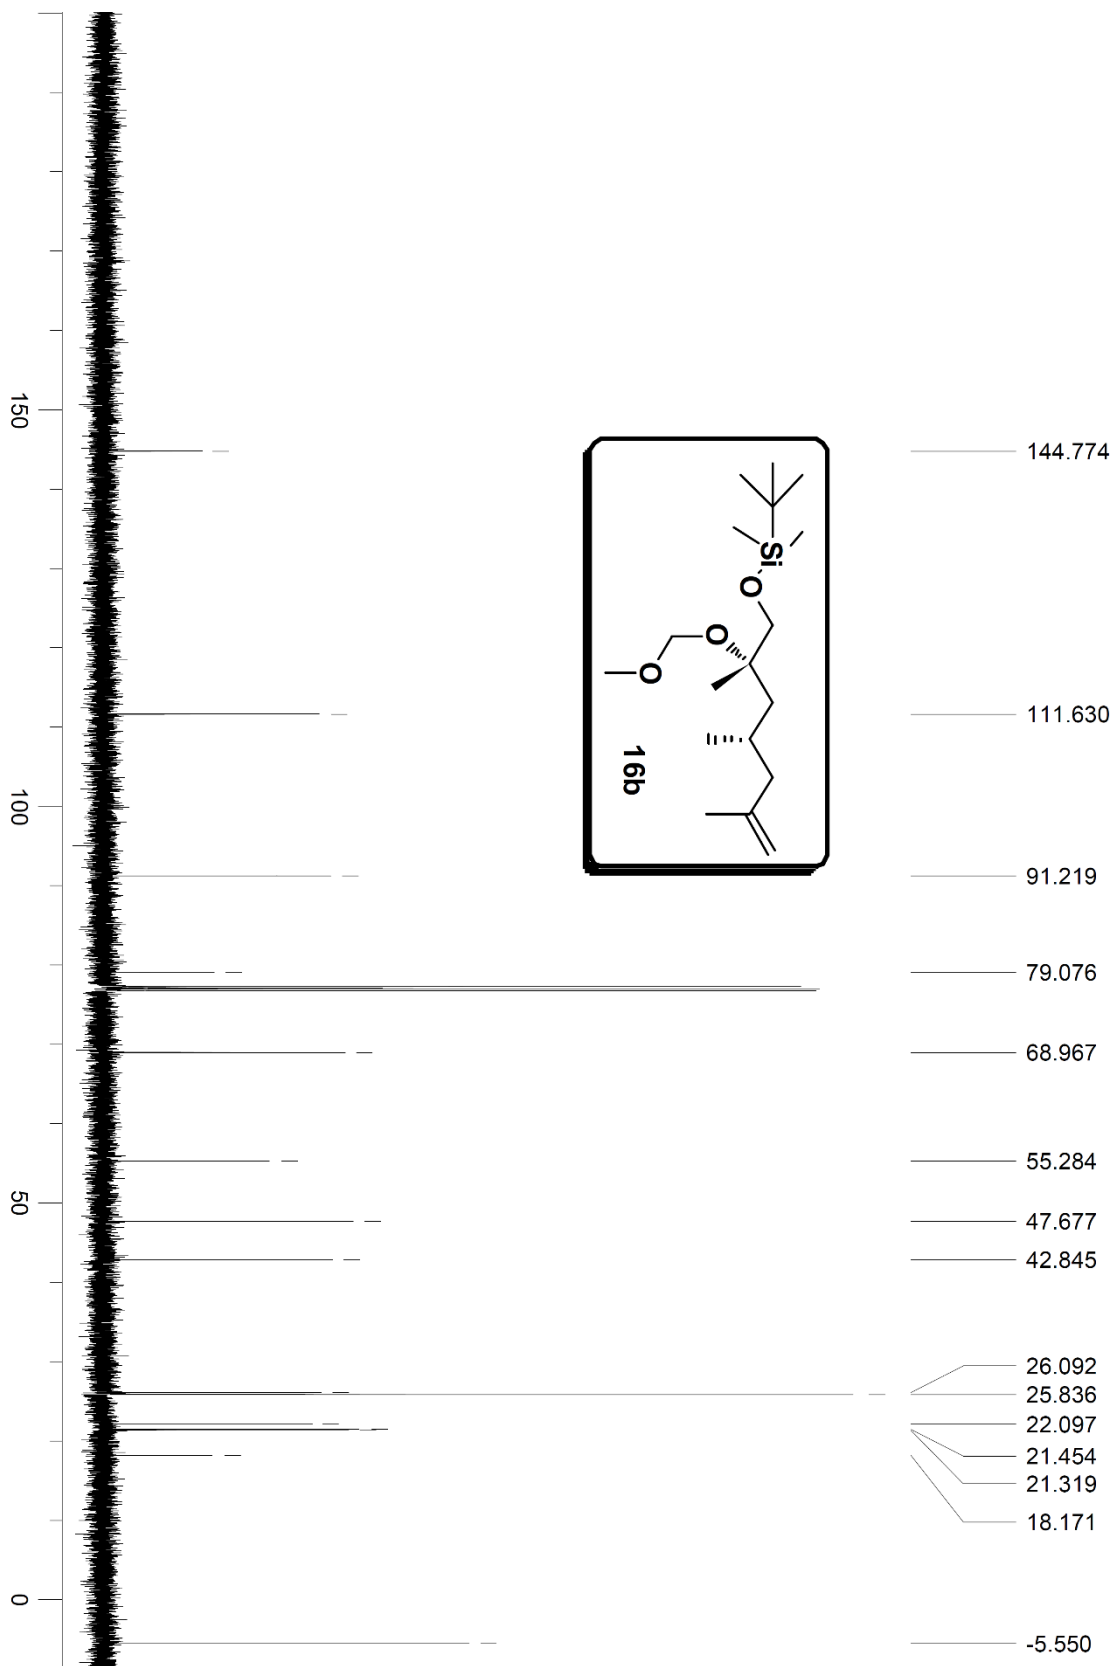



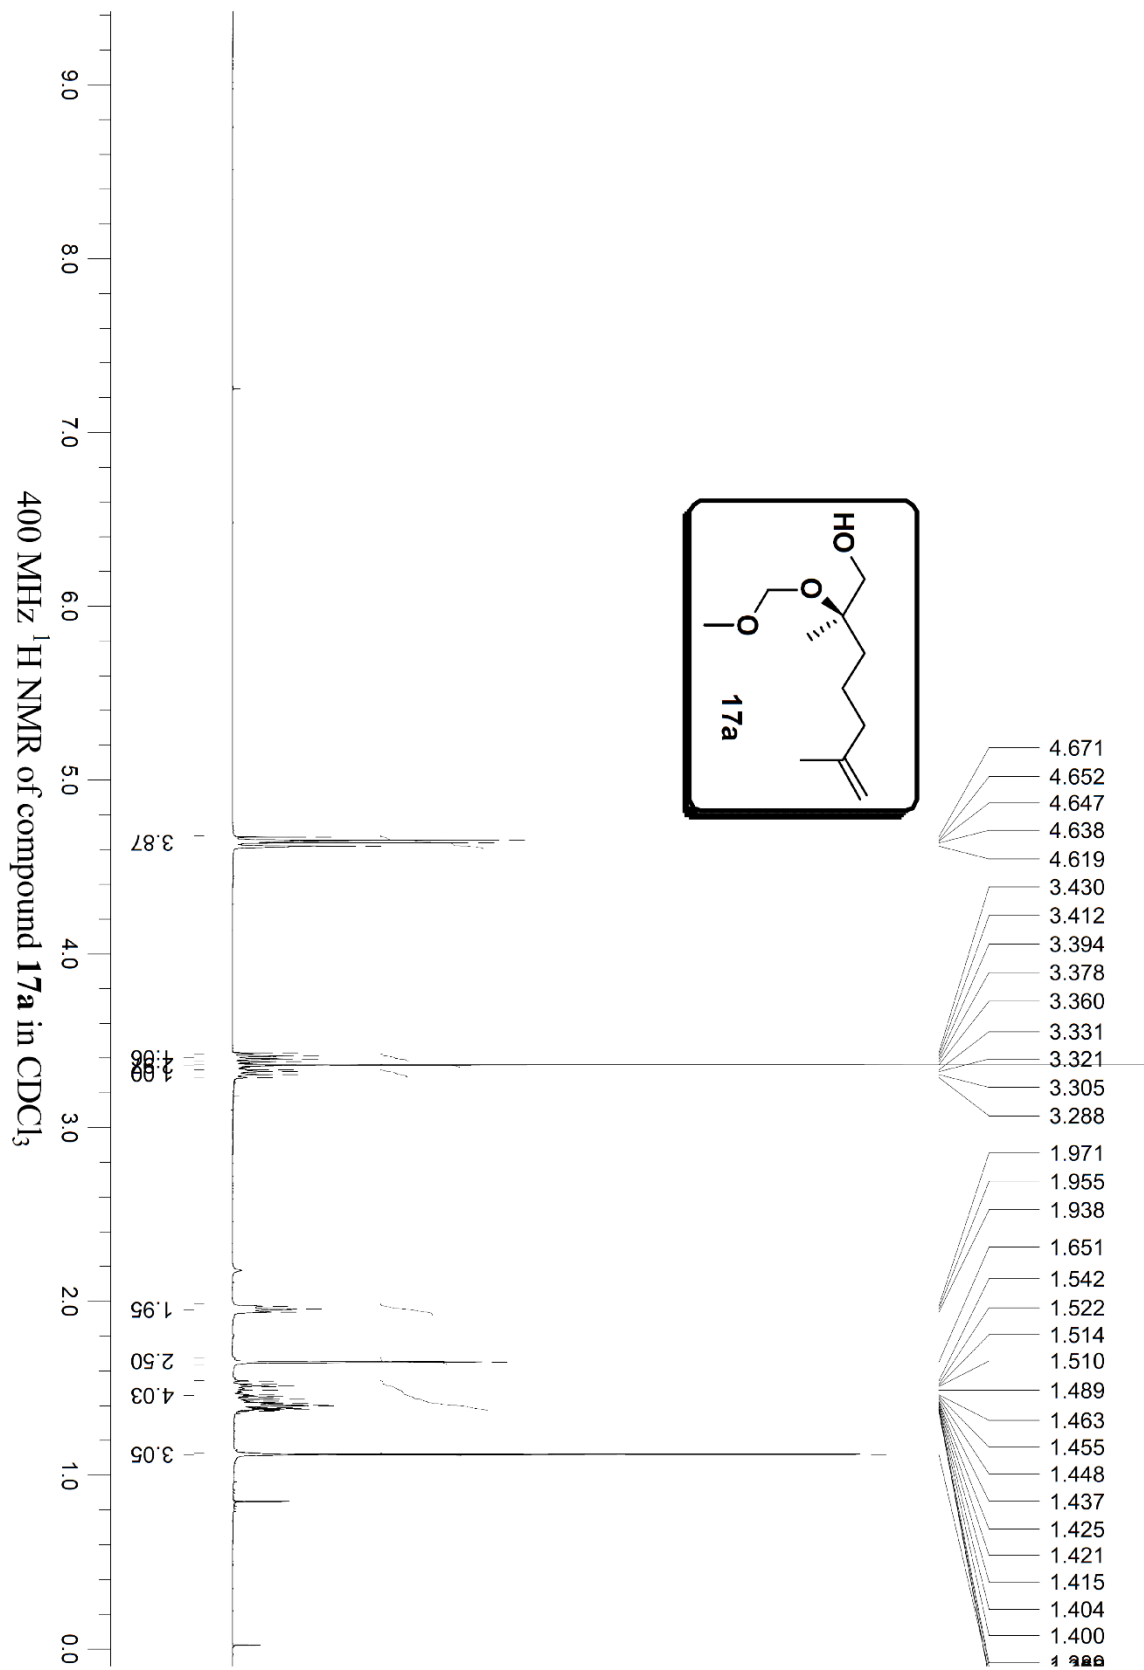

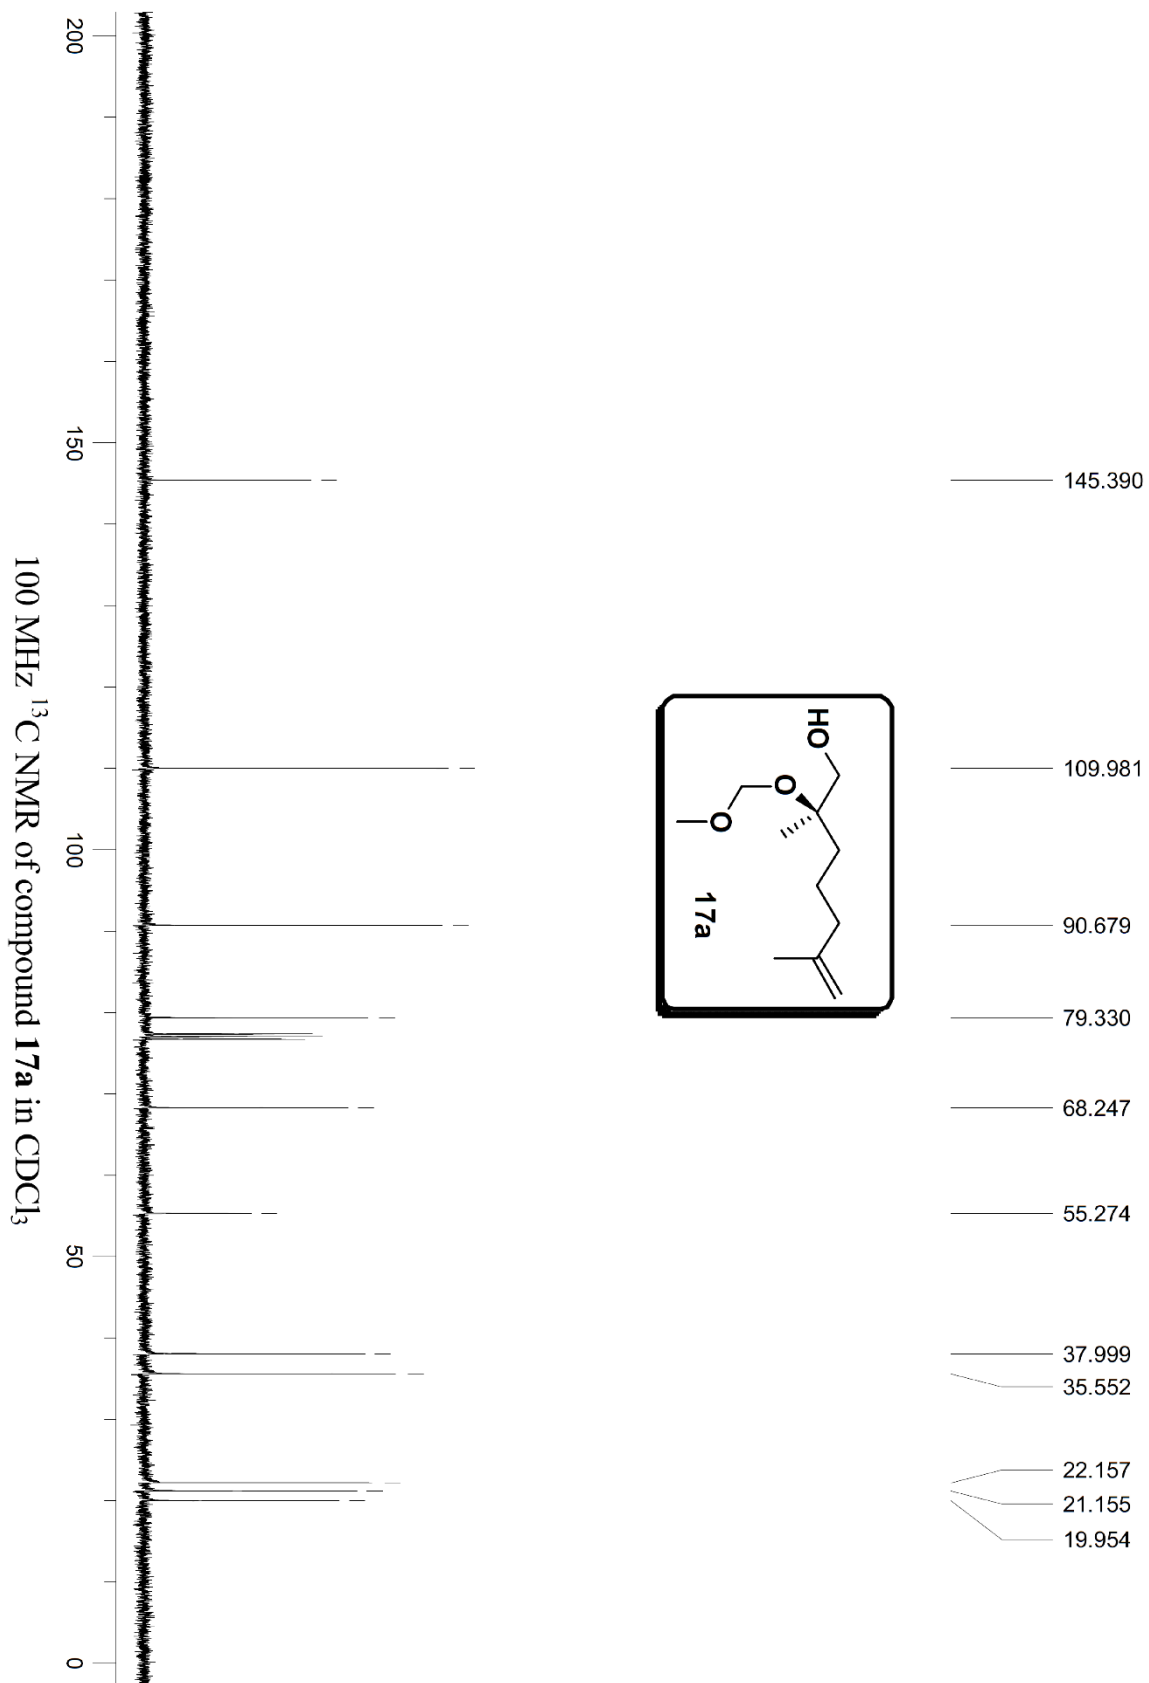



100 MHz  $^{13}\text{C}$  NMR of compound **17b** in  $\text{CDCl}_3$

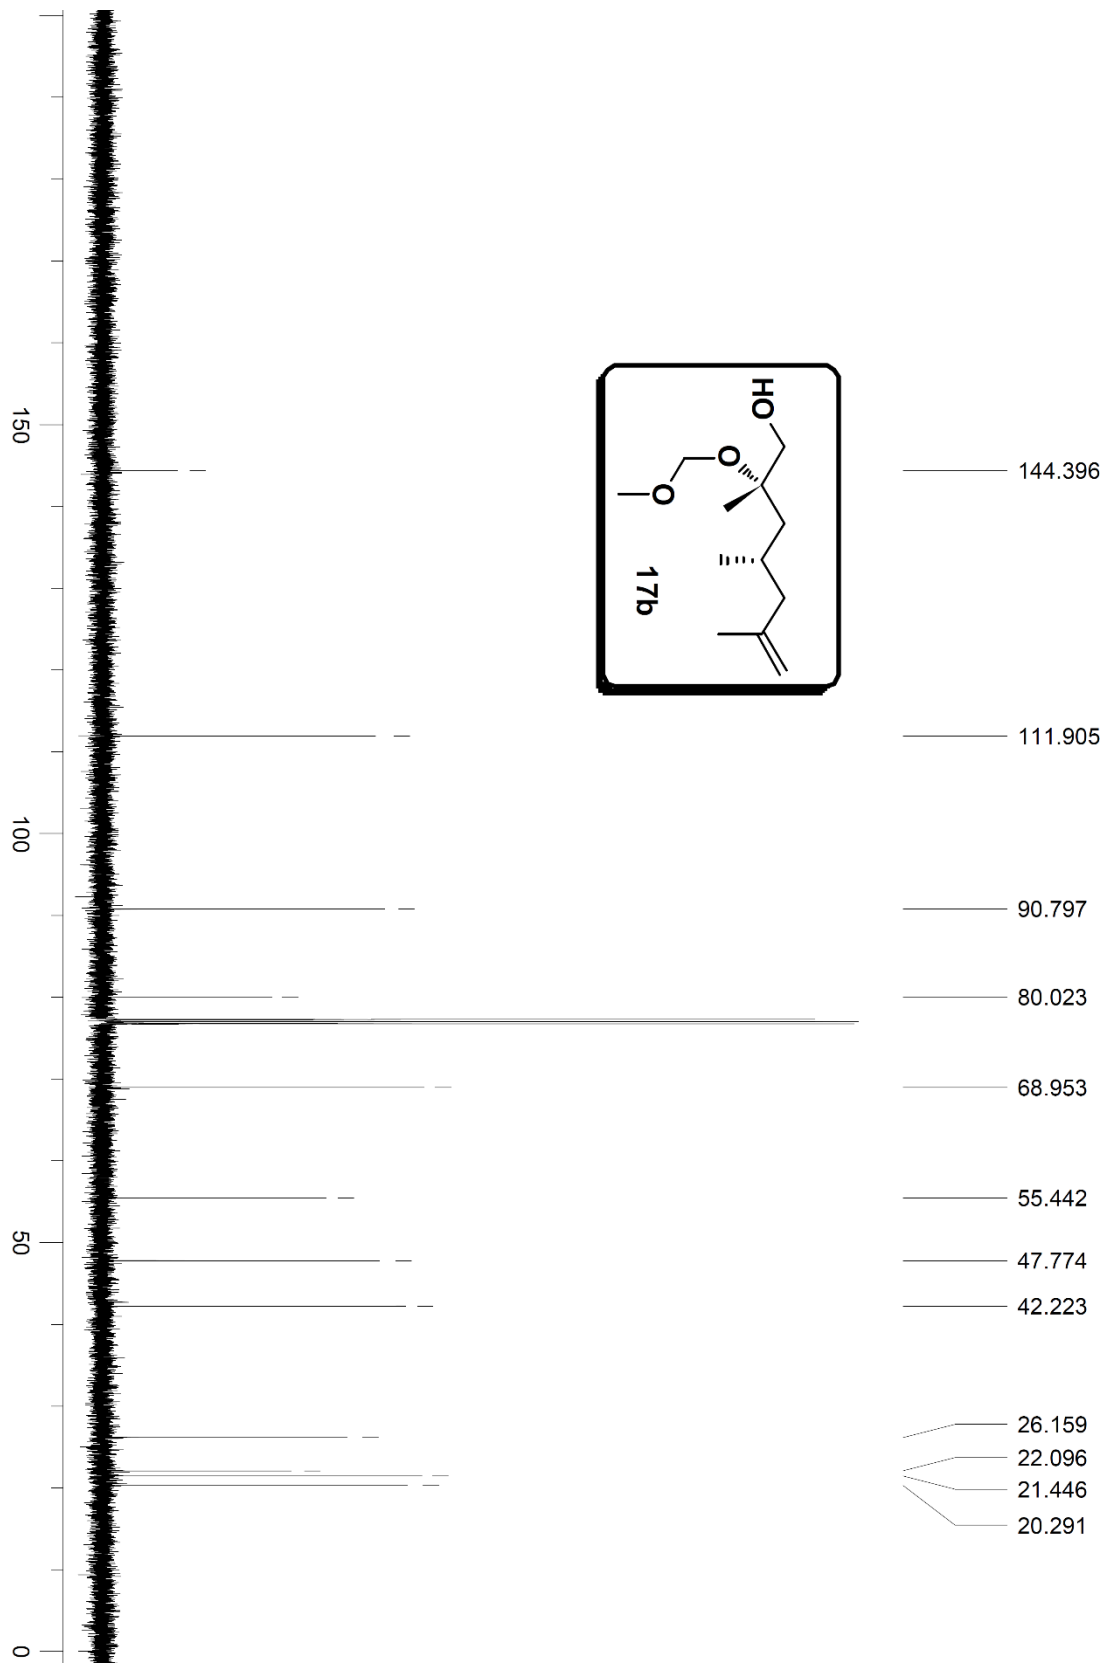



100 MHz  $^{13}\text{C}$  NMR of compound **19a** in  $\text{CDCl}_3$

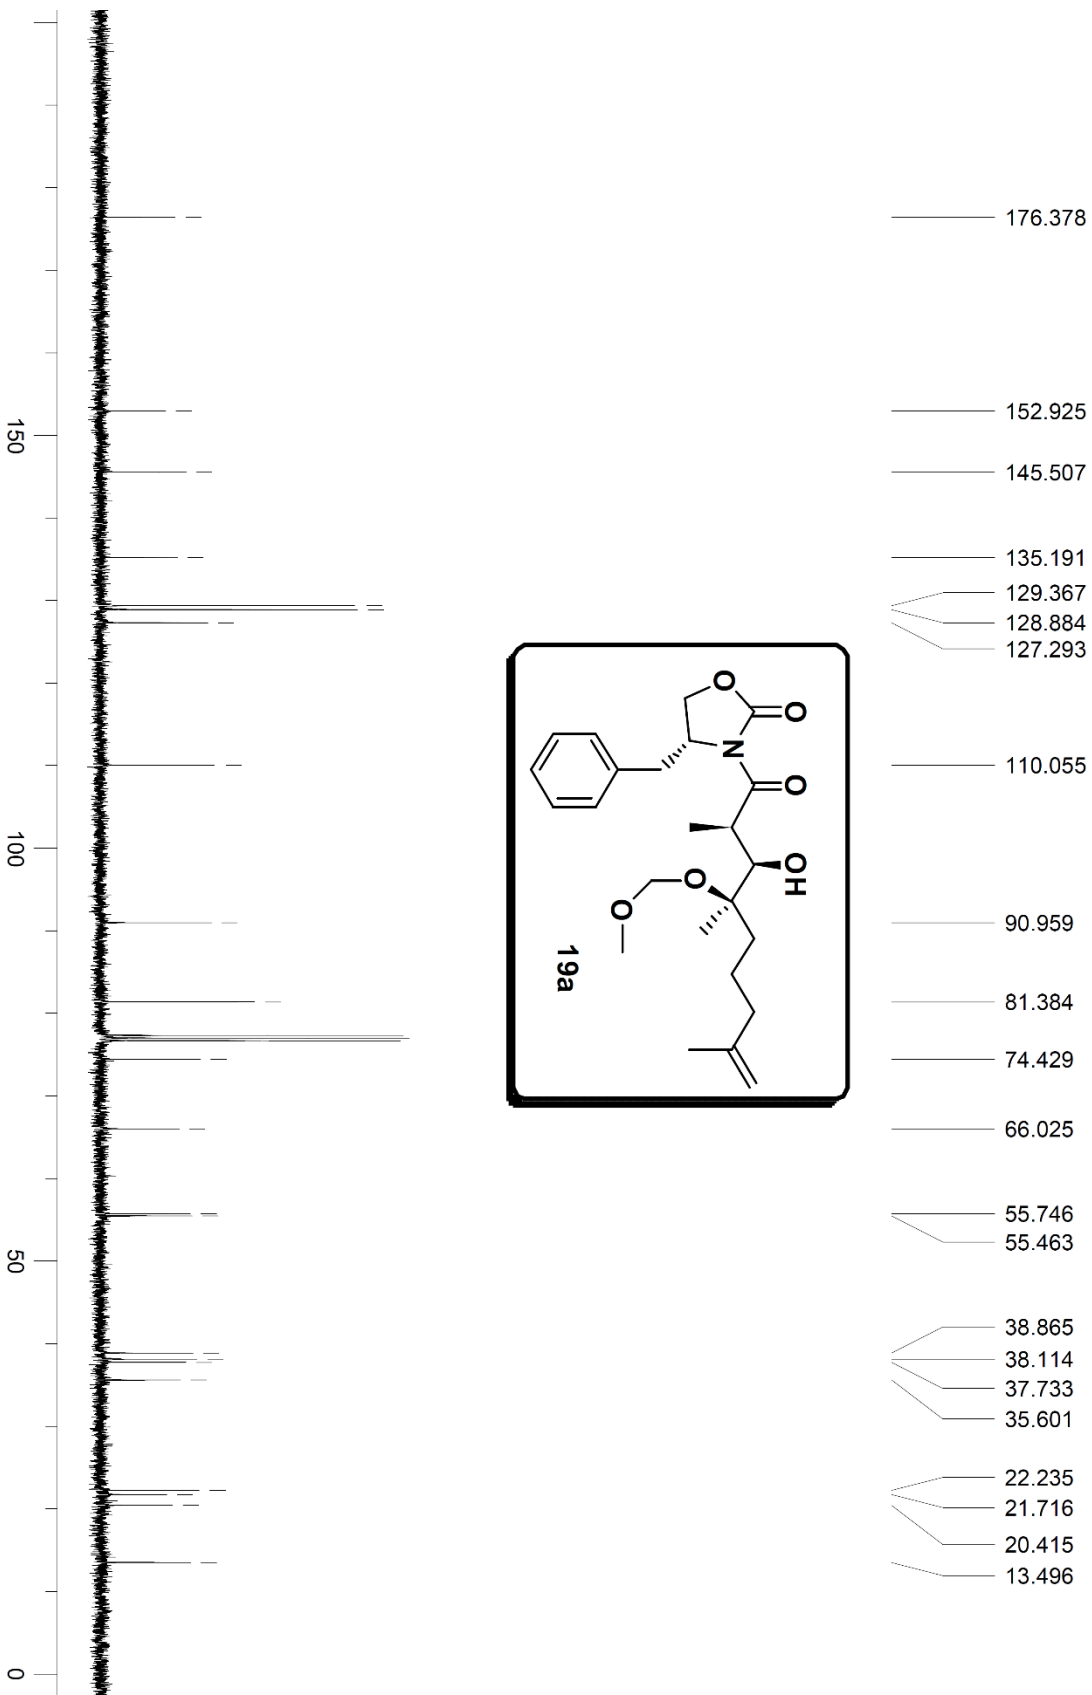

400 MHz <sup>1</sup>H NMR of compound **19b** in CDCl<sub>3</sub>

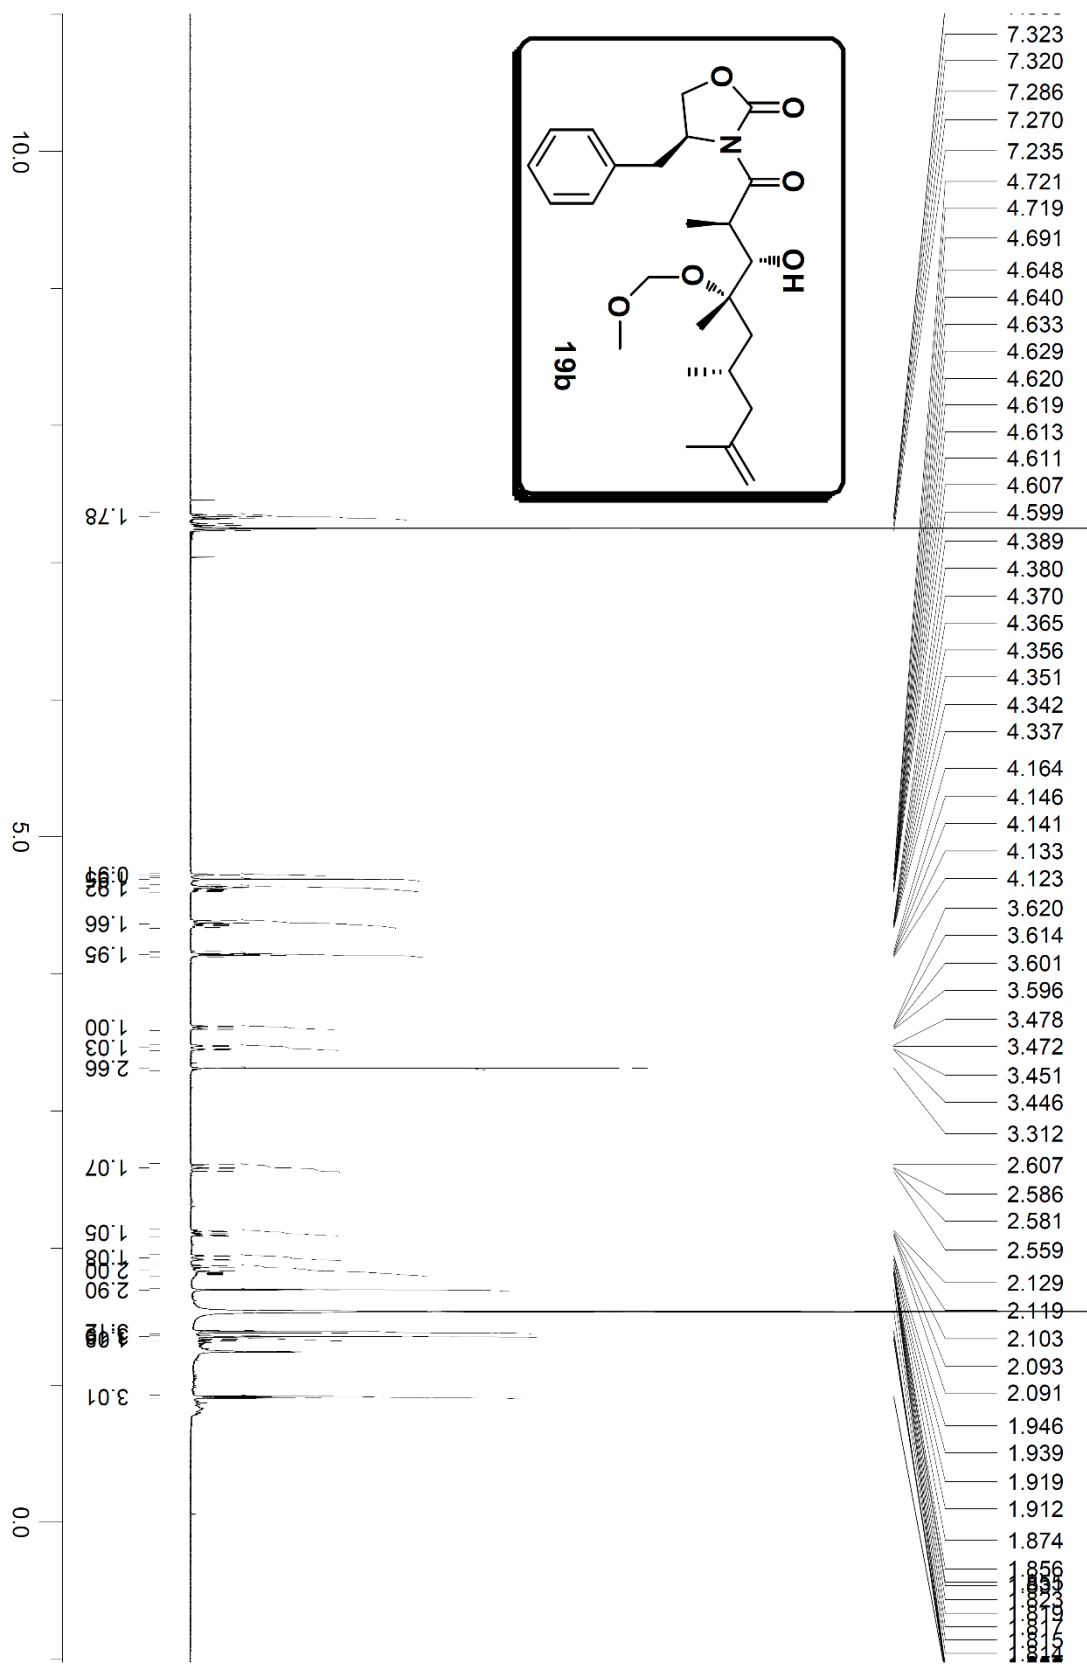

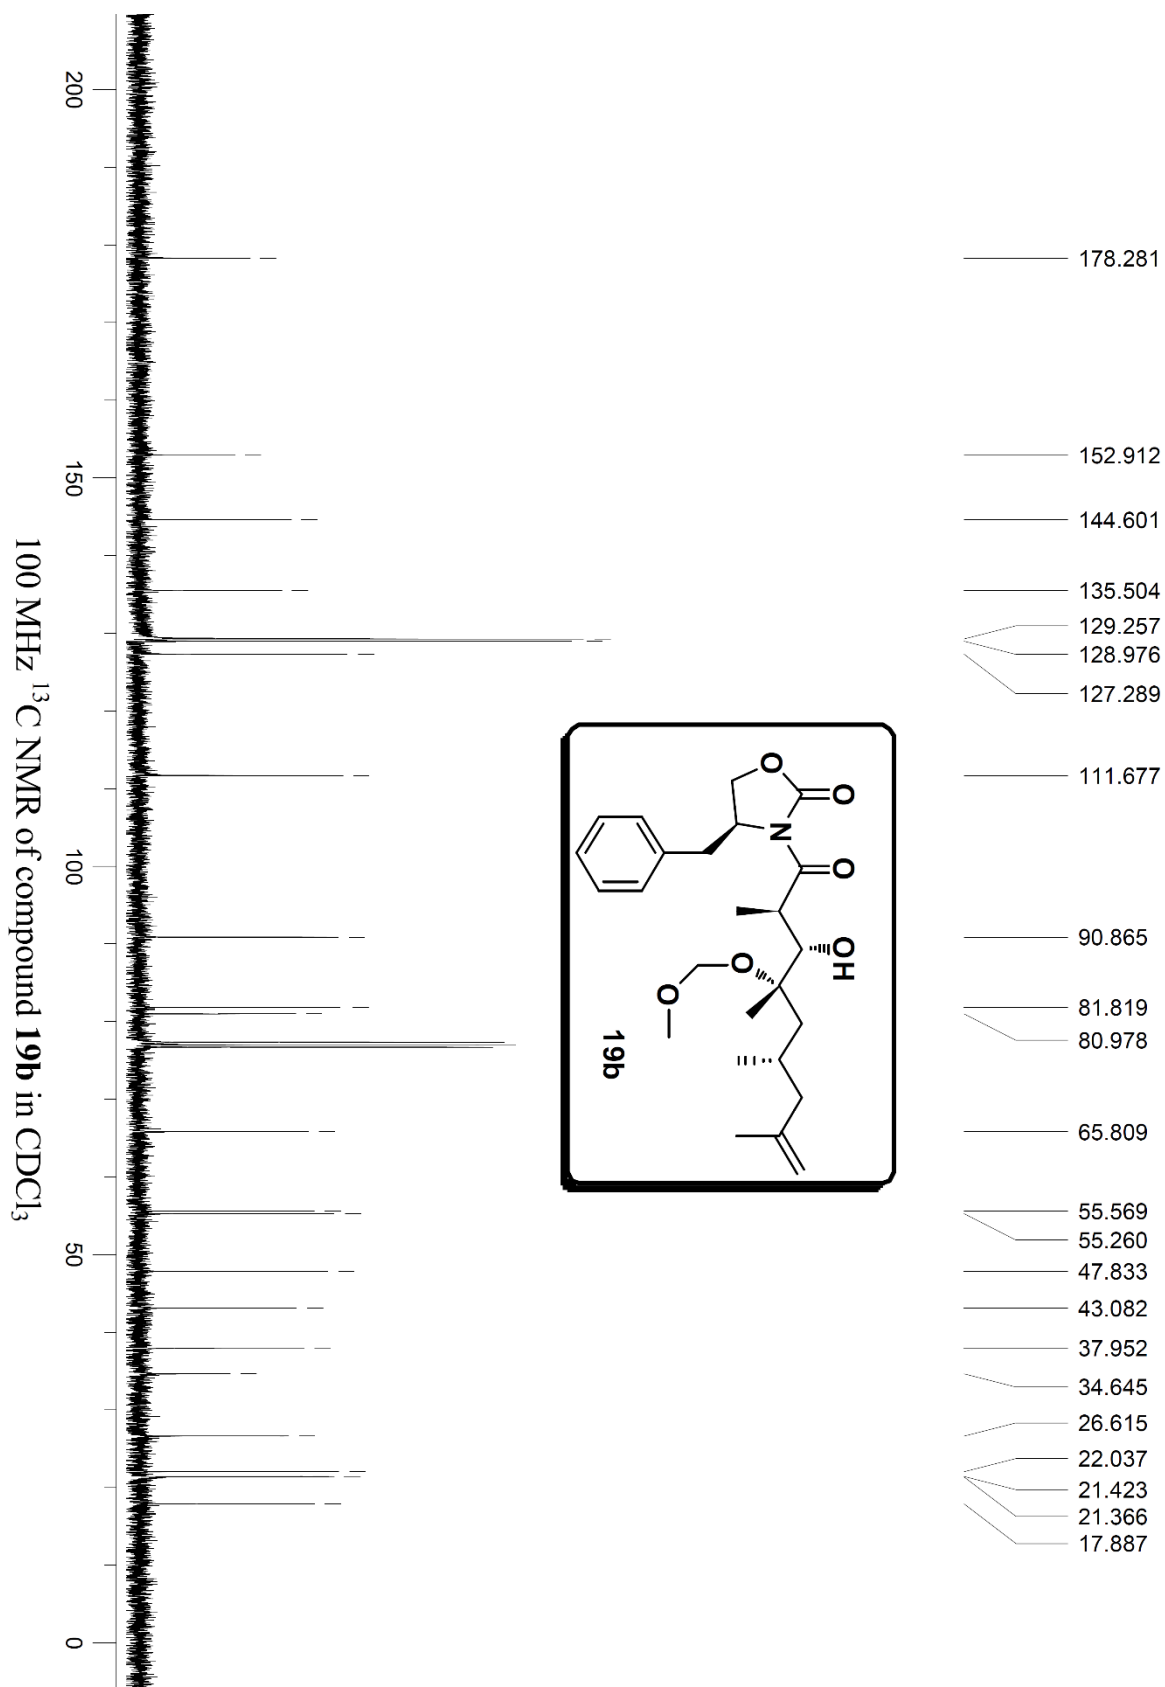



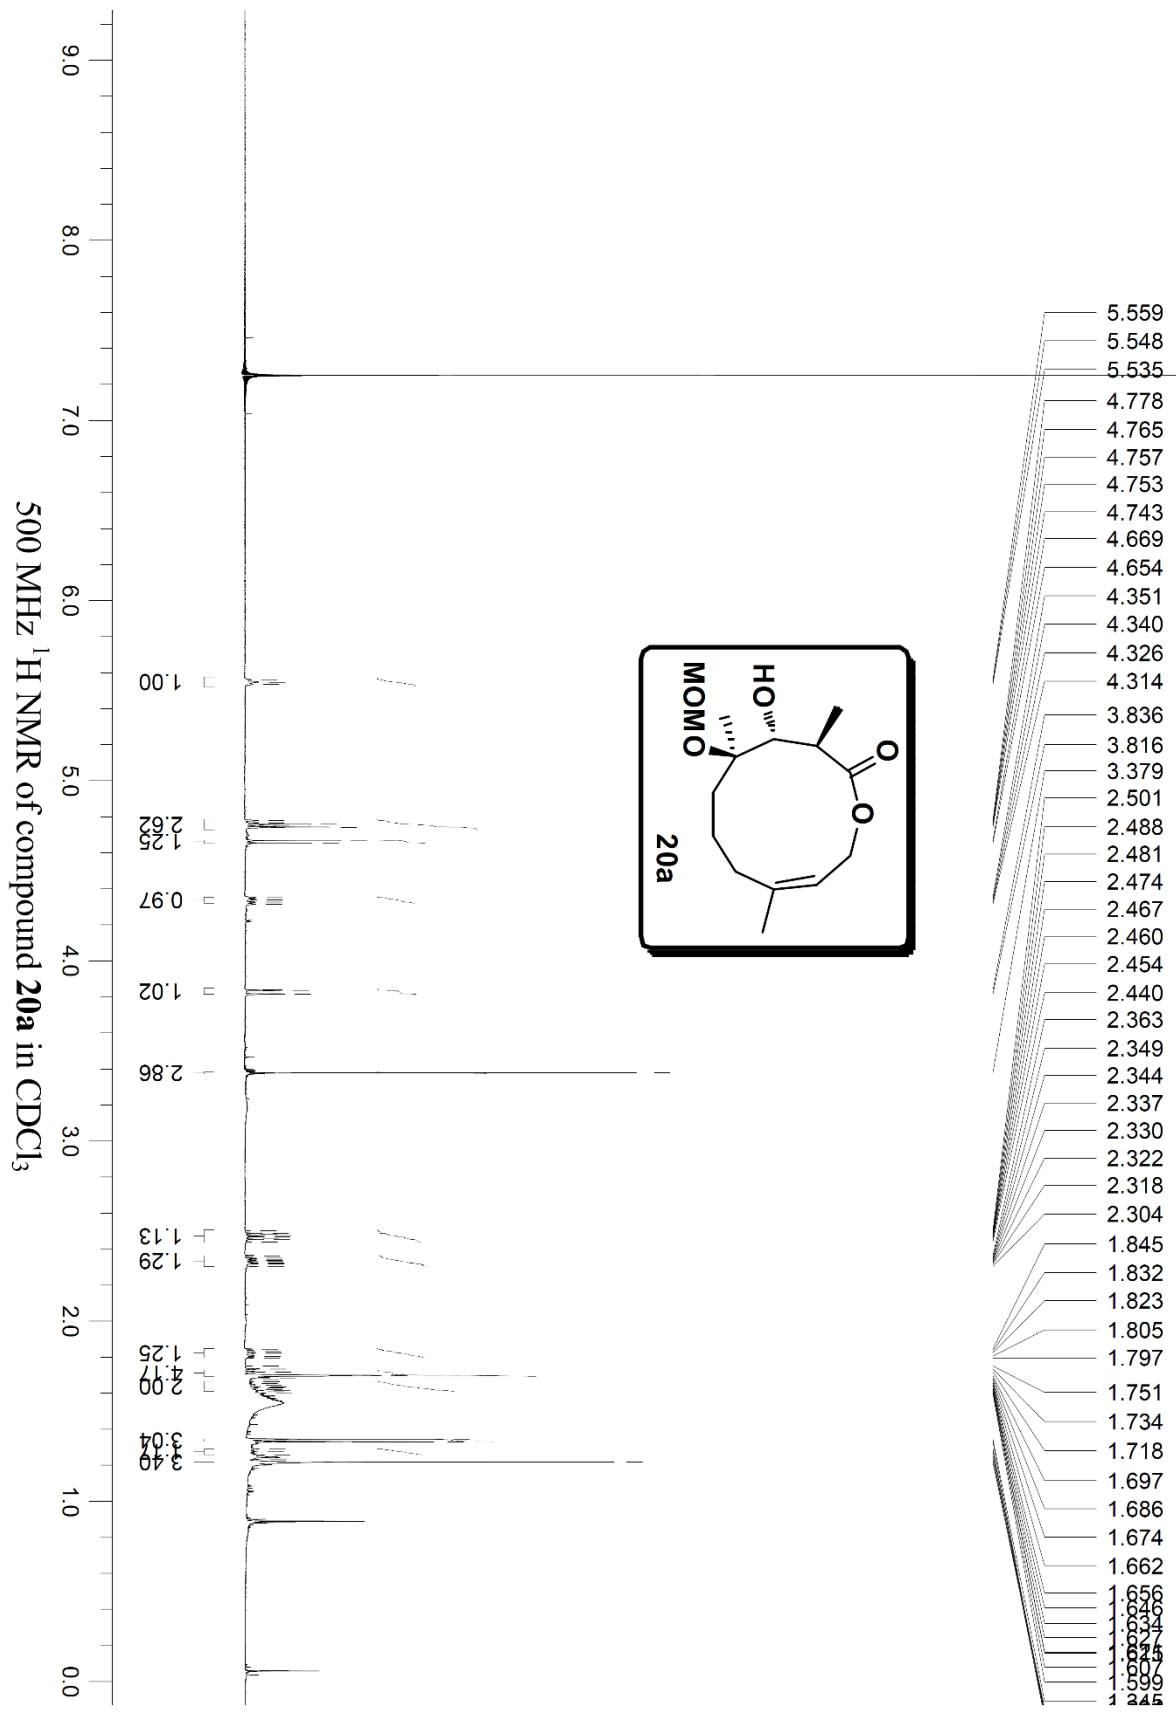

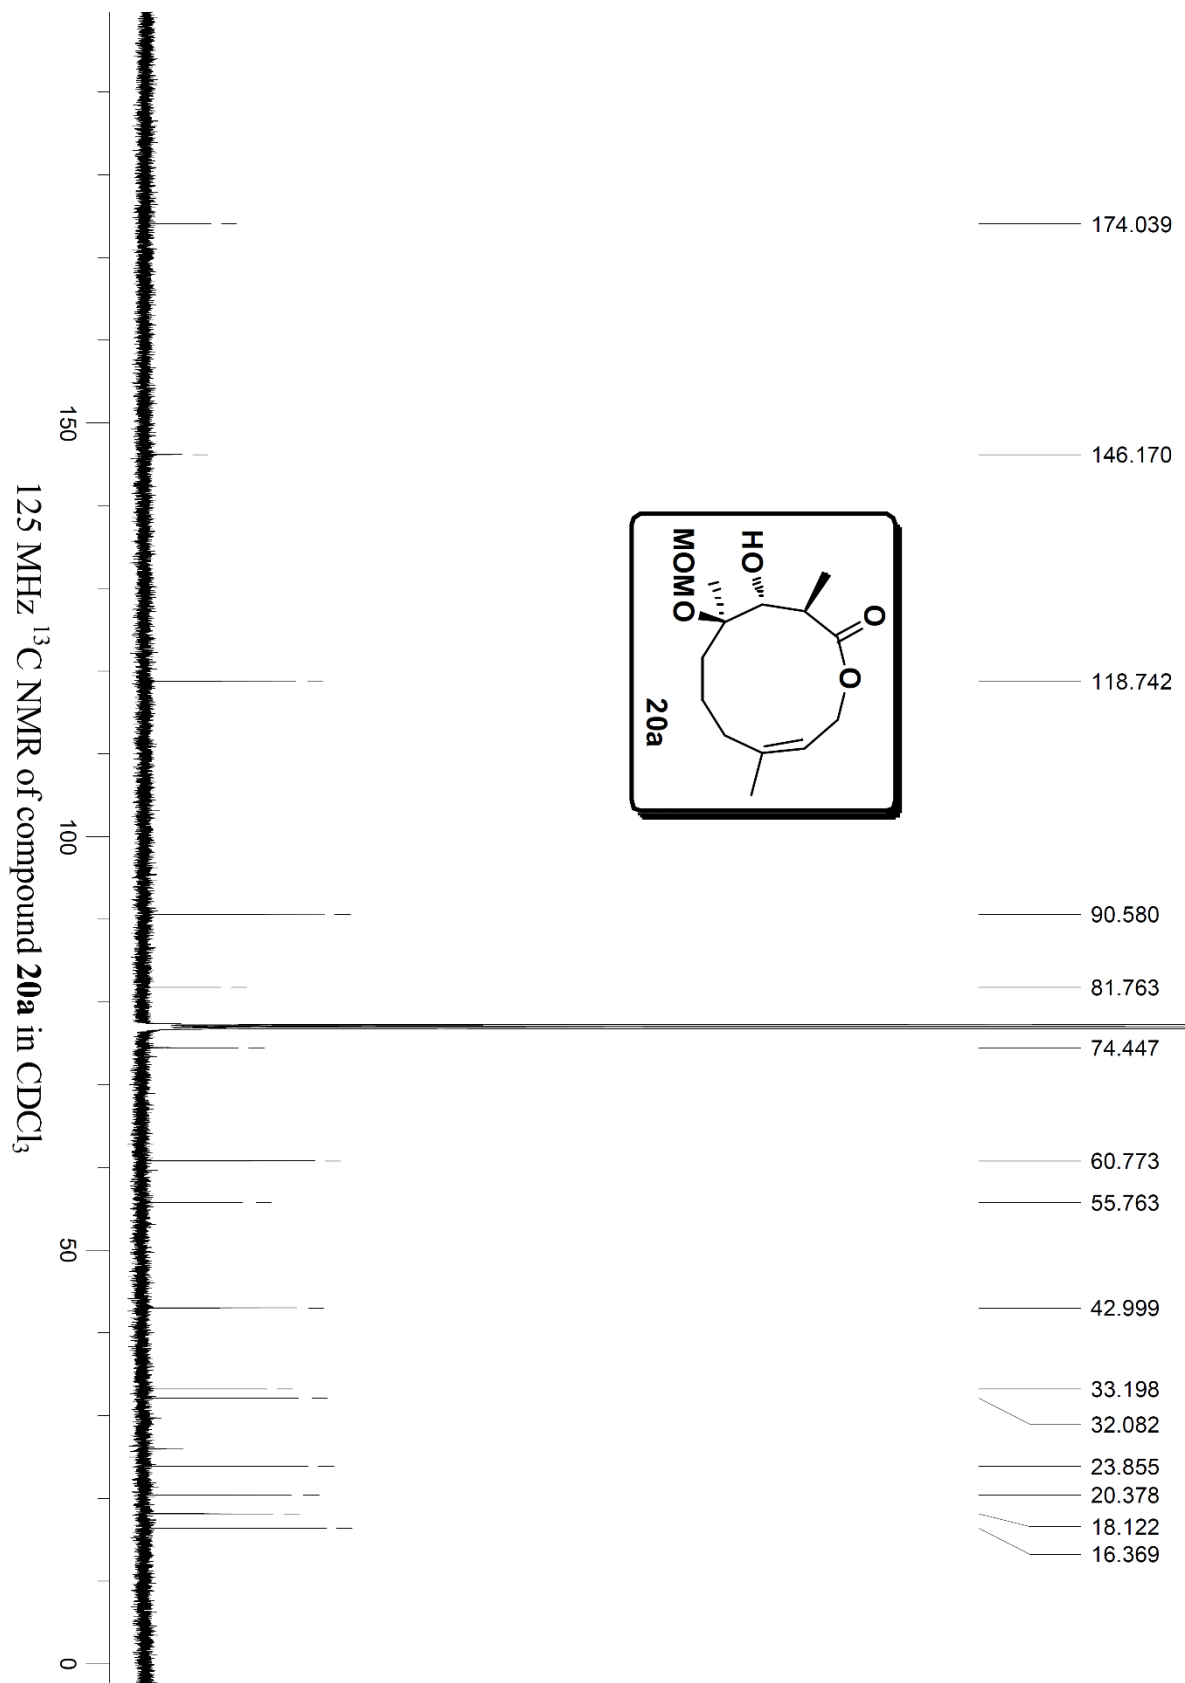

400 MHz  $^1\text{H}$  NMR of compound (Z)-20b in  $\text{CDCl}_3$

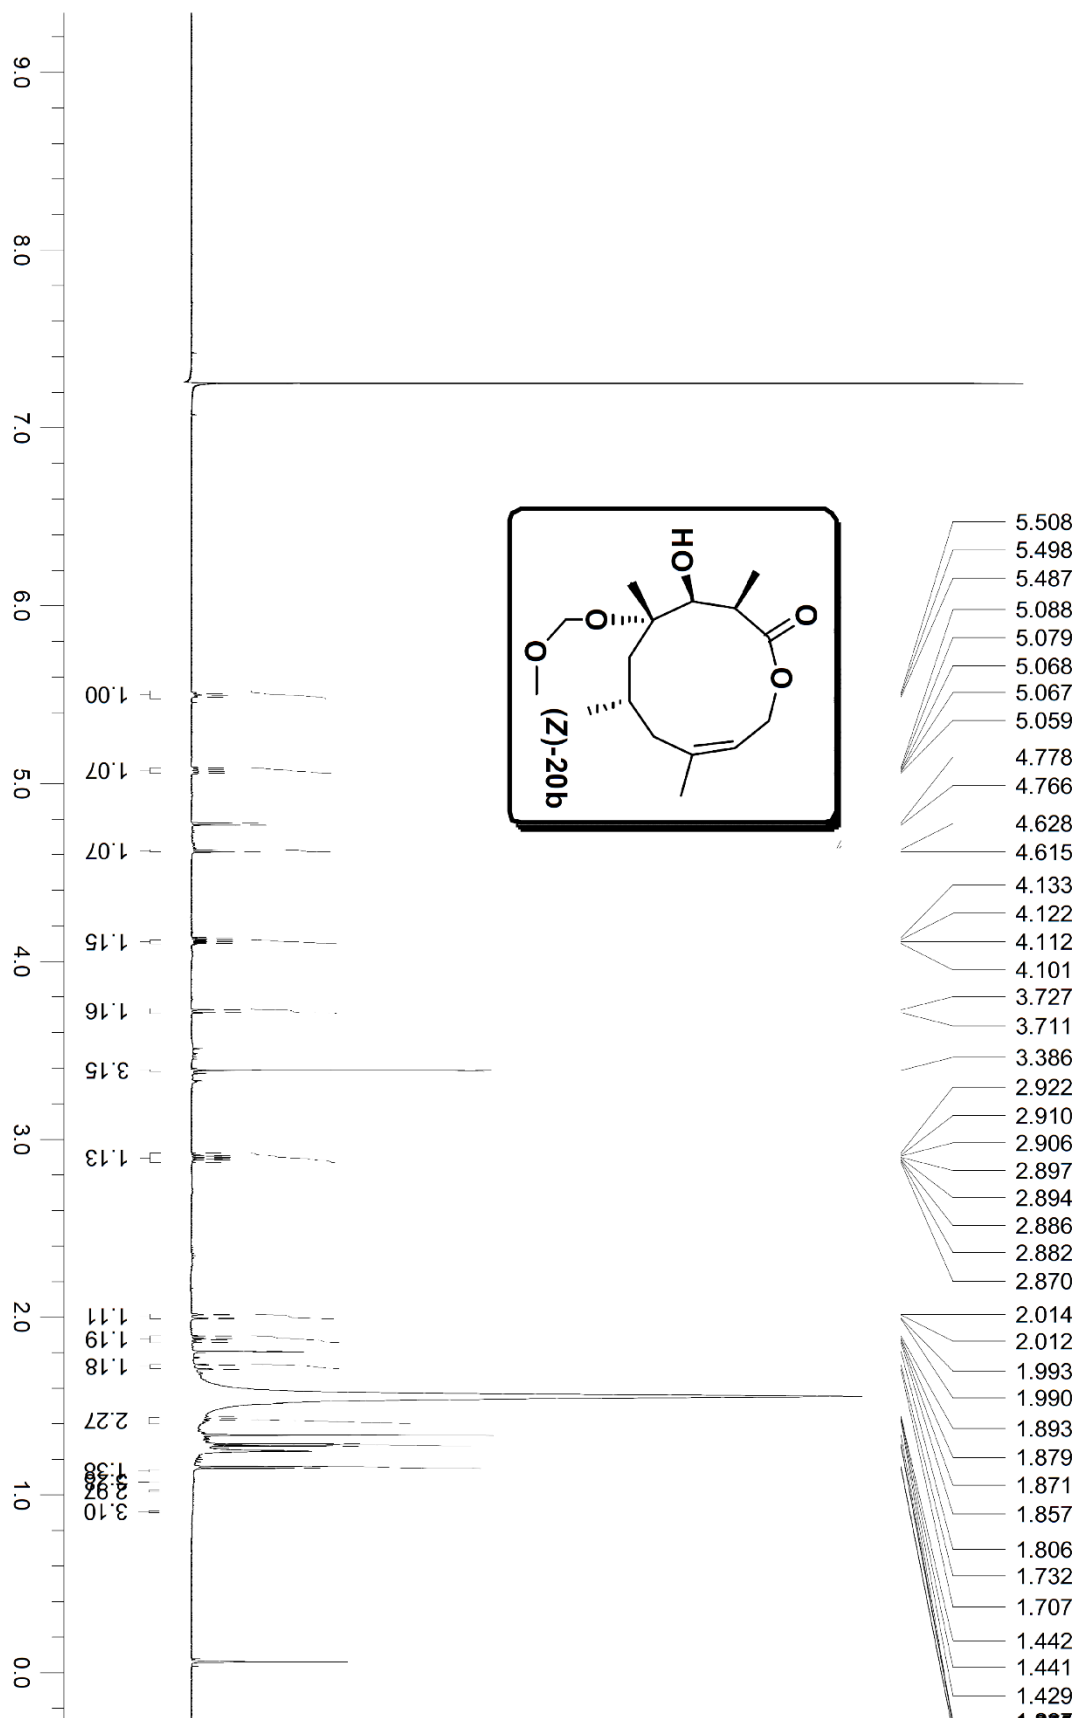

100 MHz  $^{13}\text{C}$  NMR of compound (Z)-20b in  $\text{CDCl}_3$

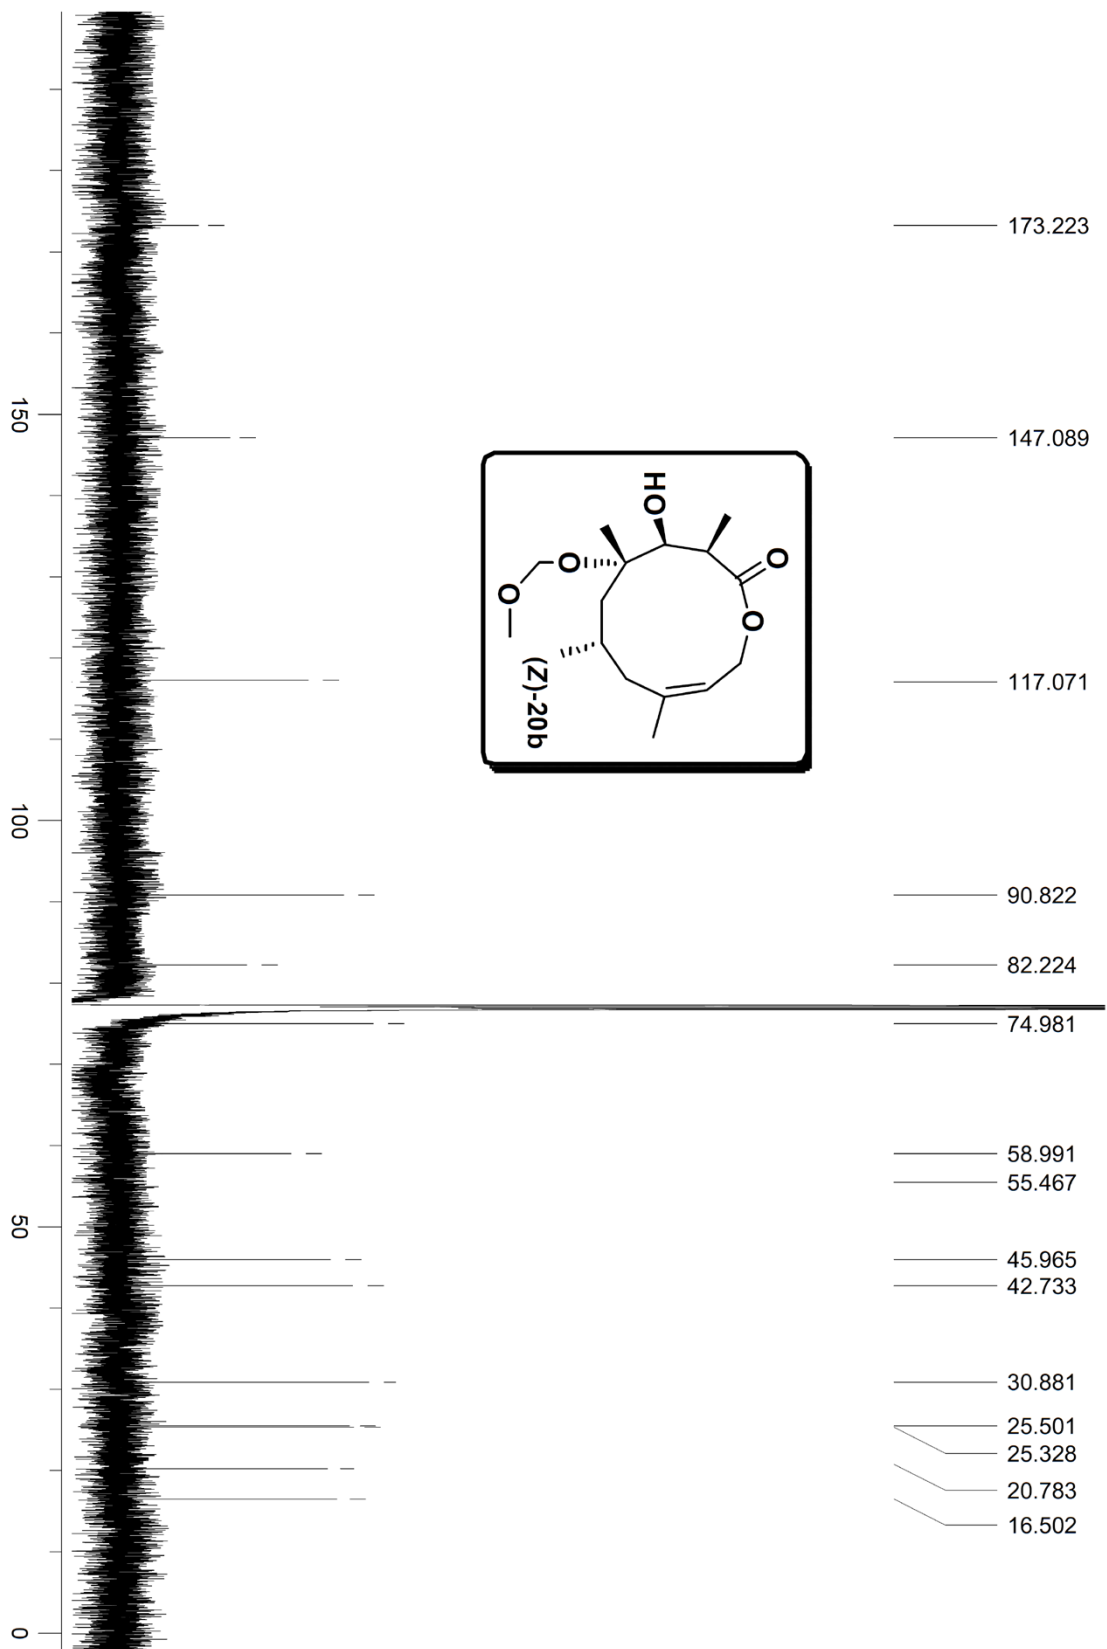

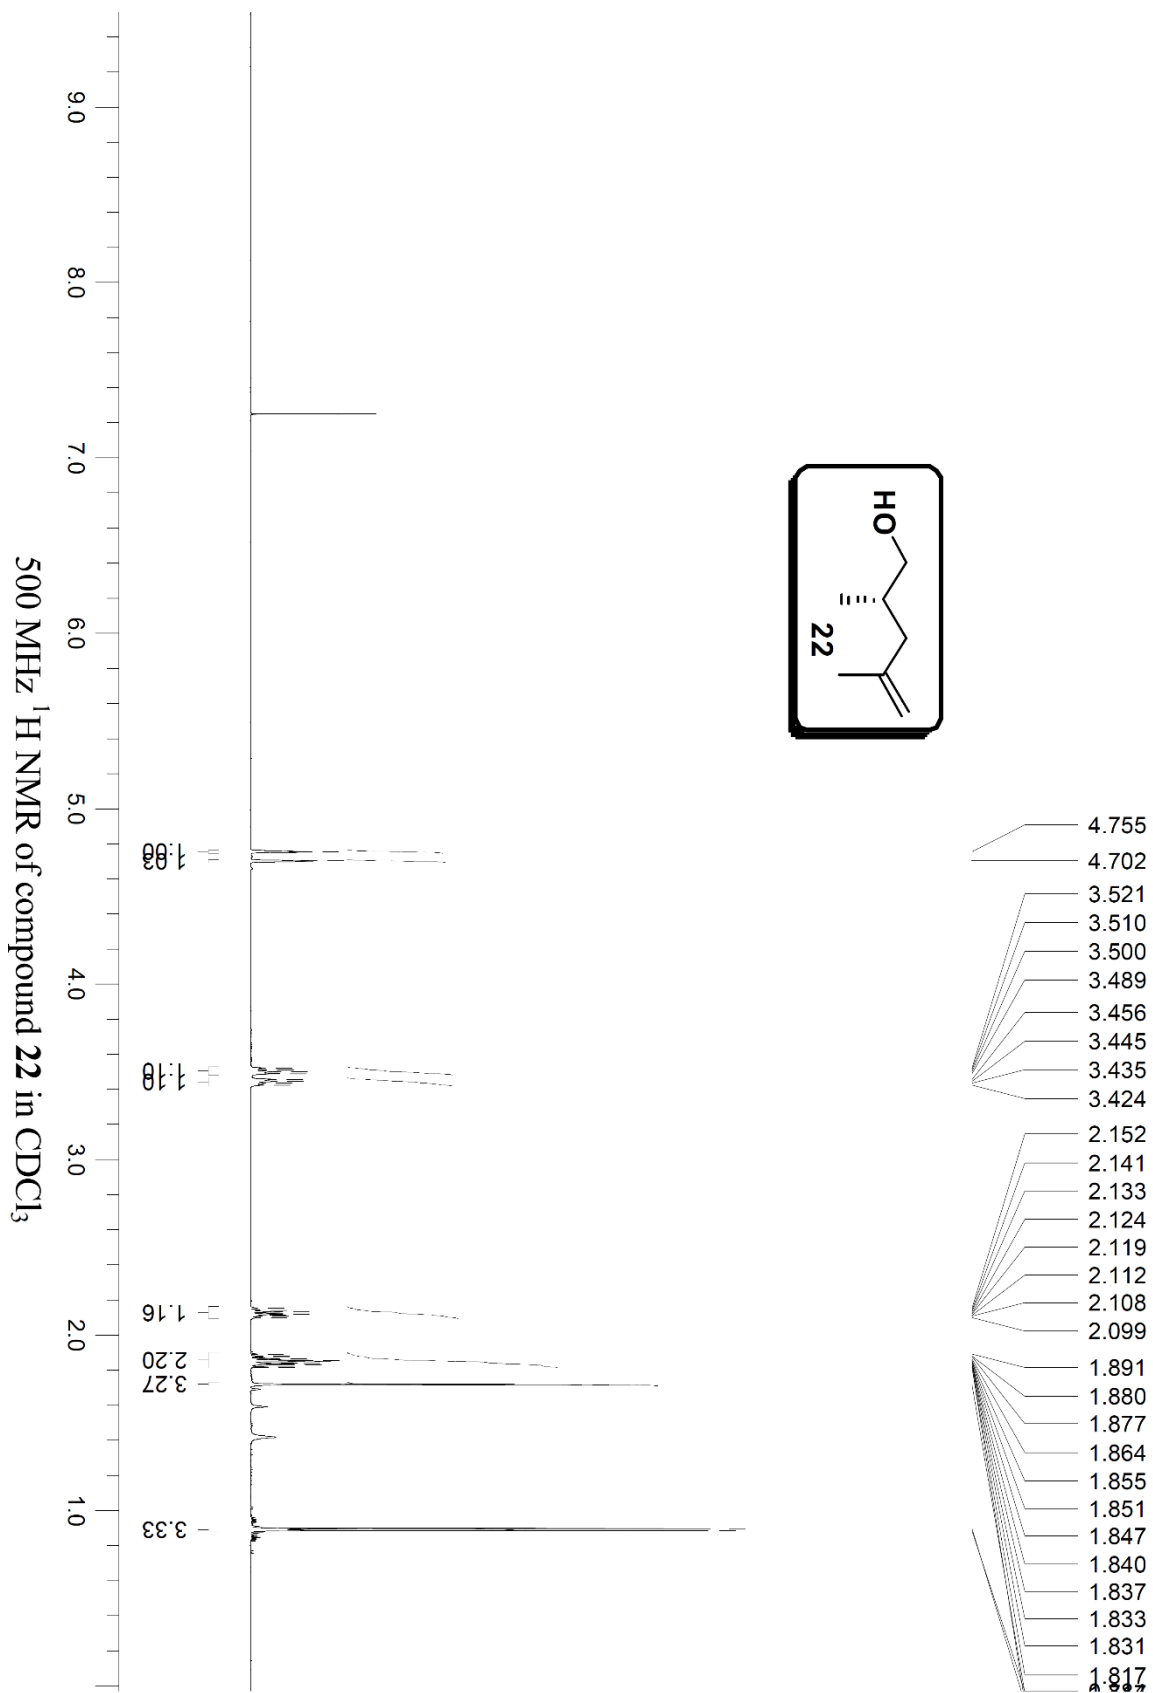

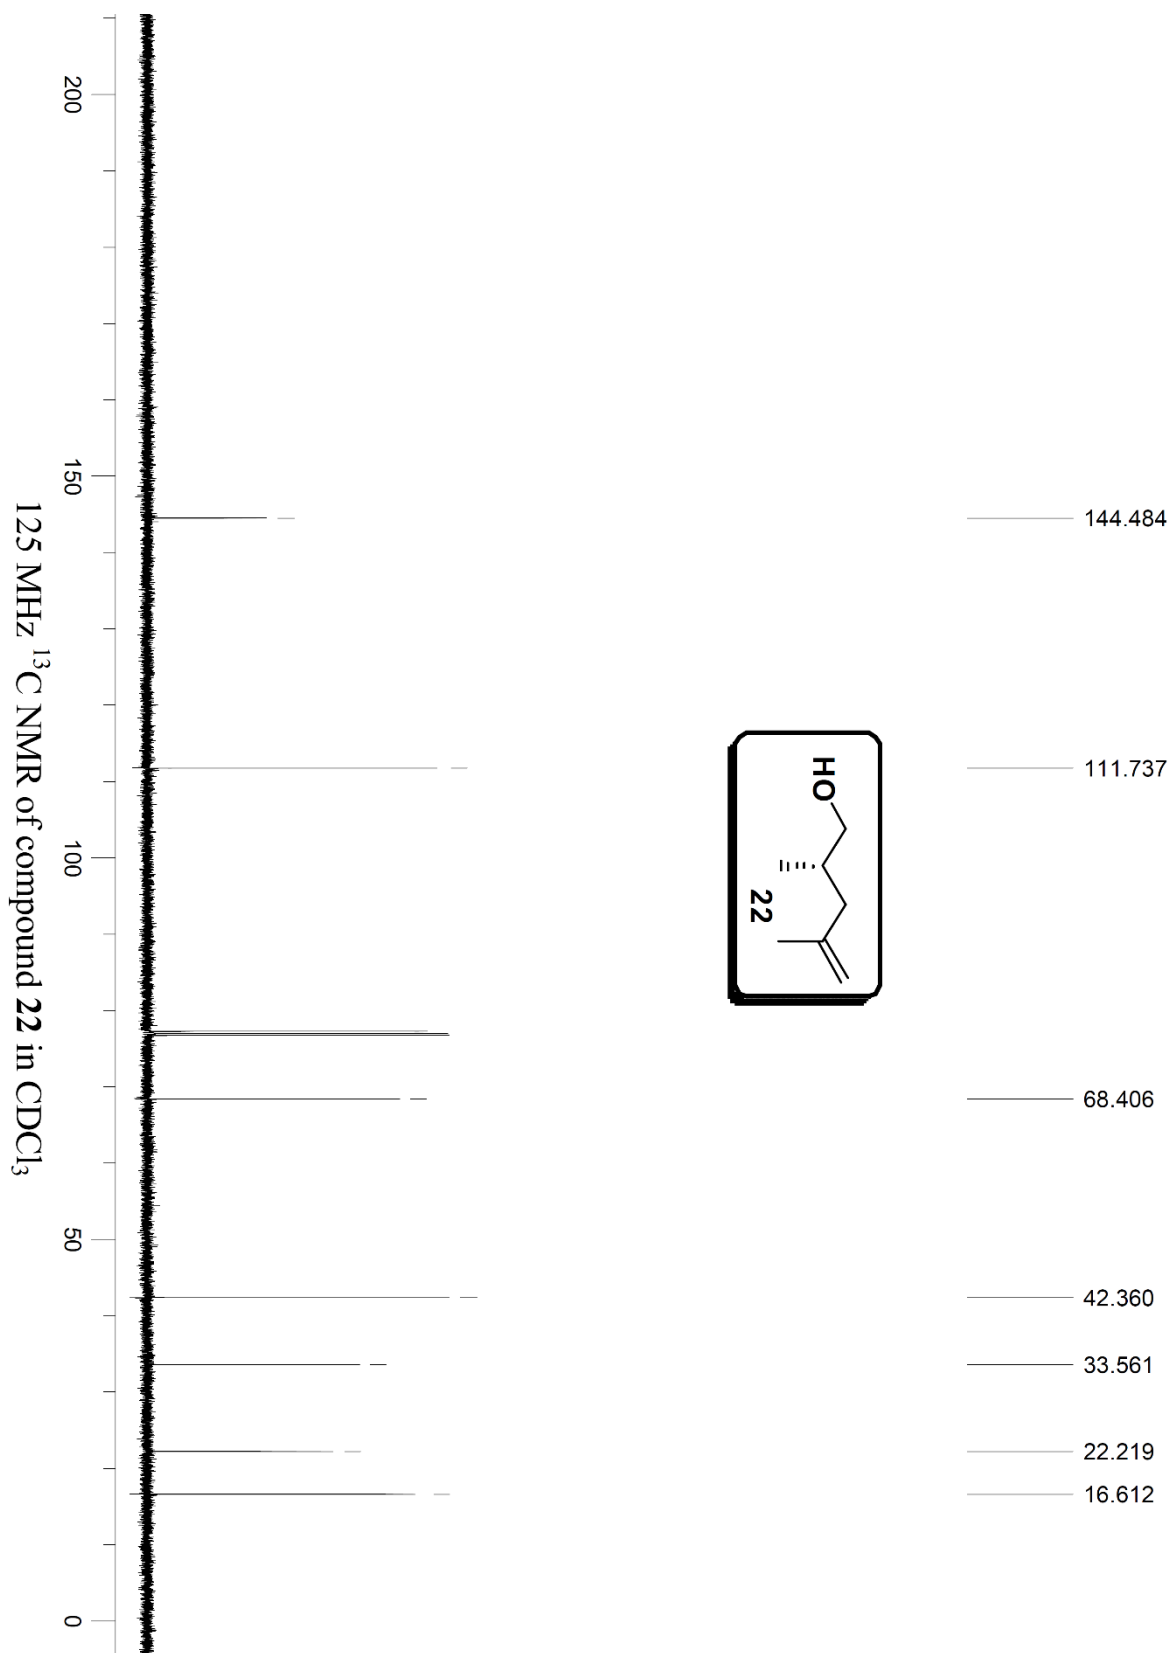

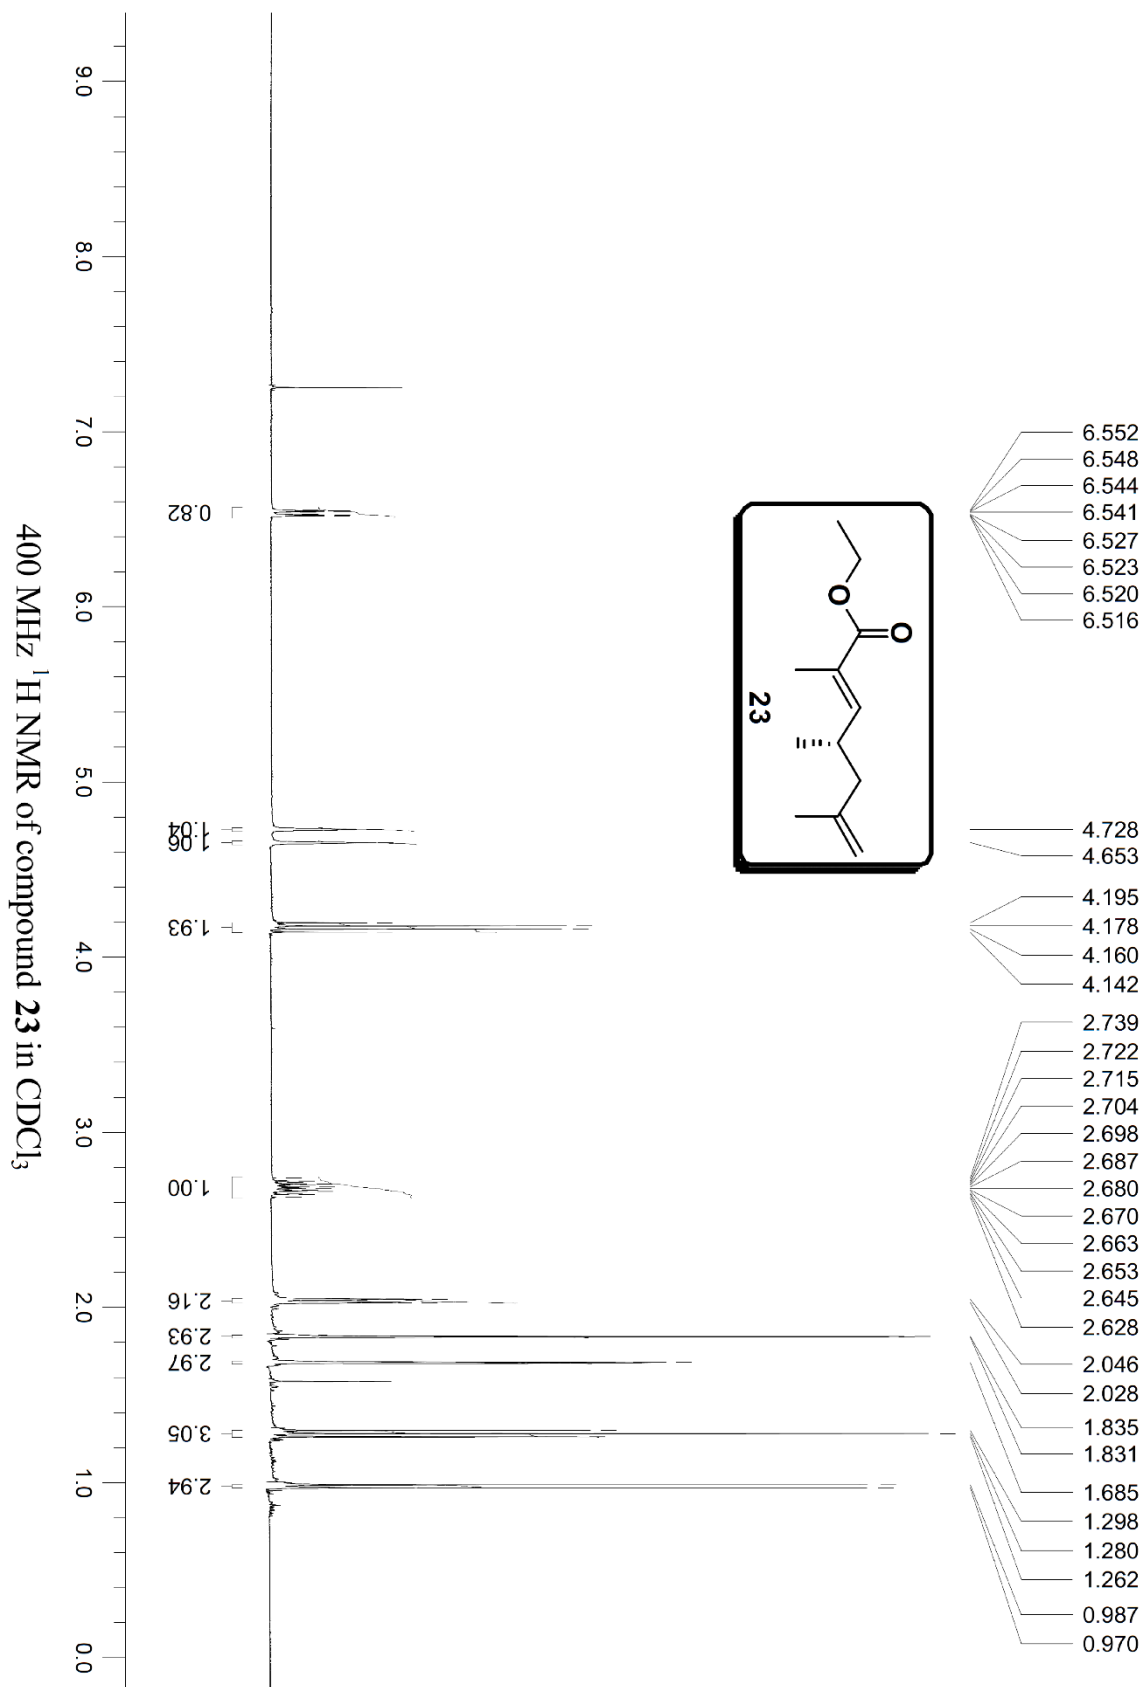

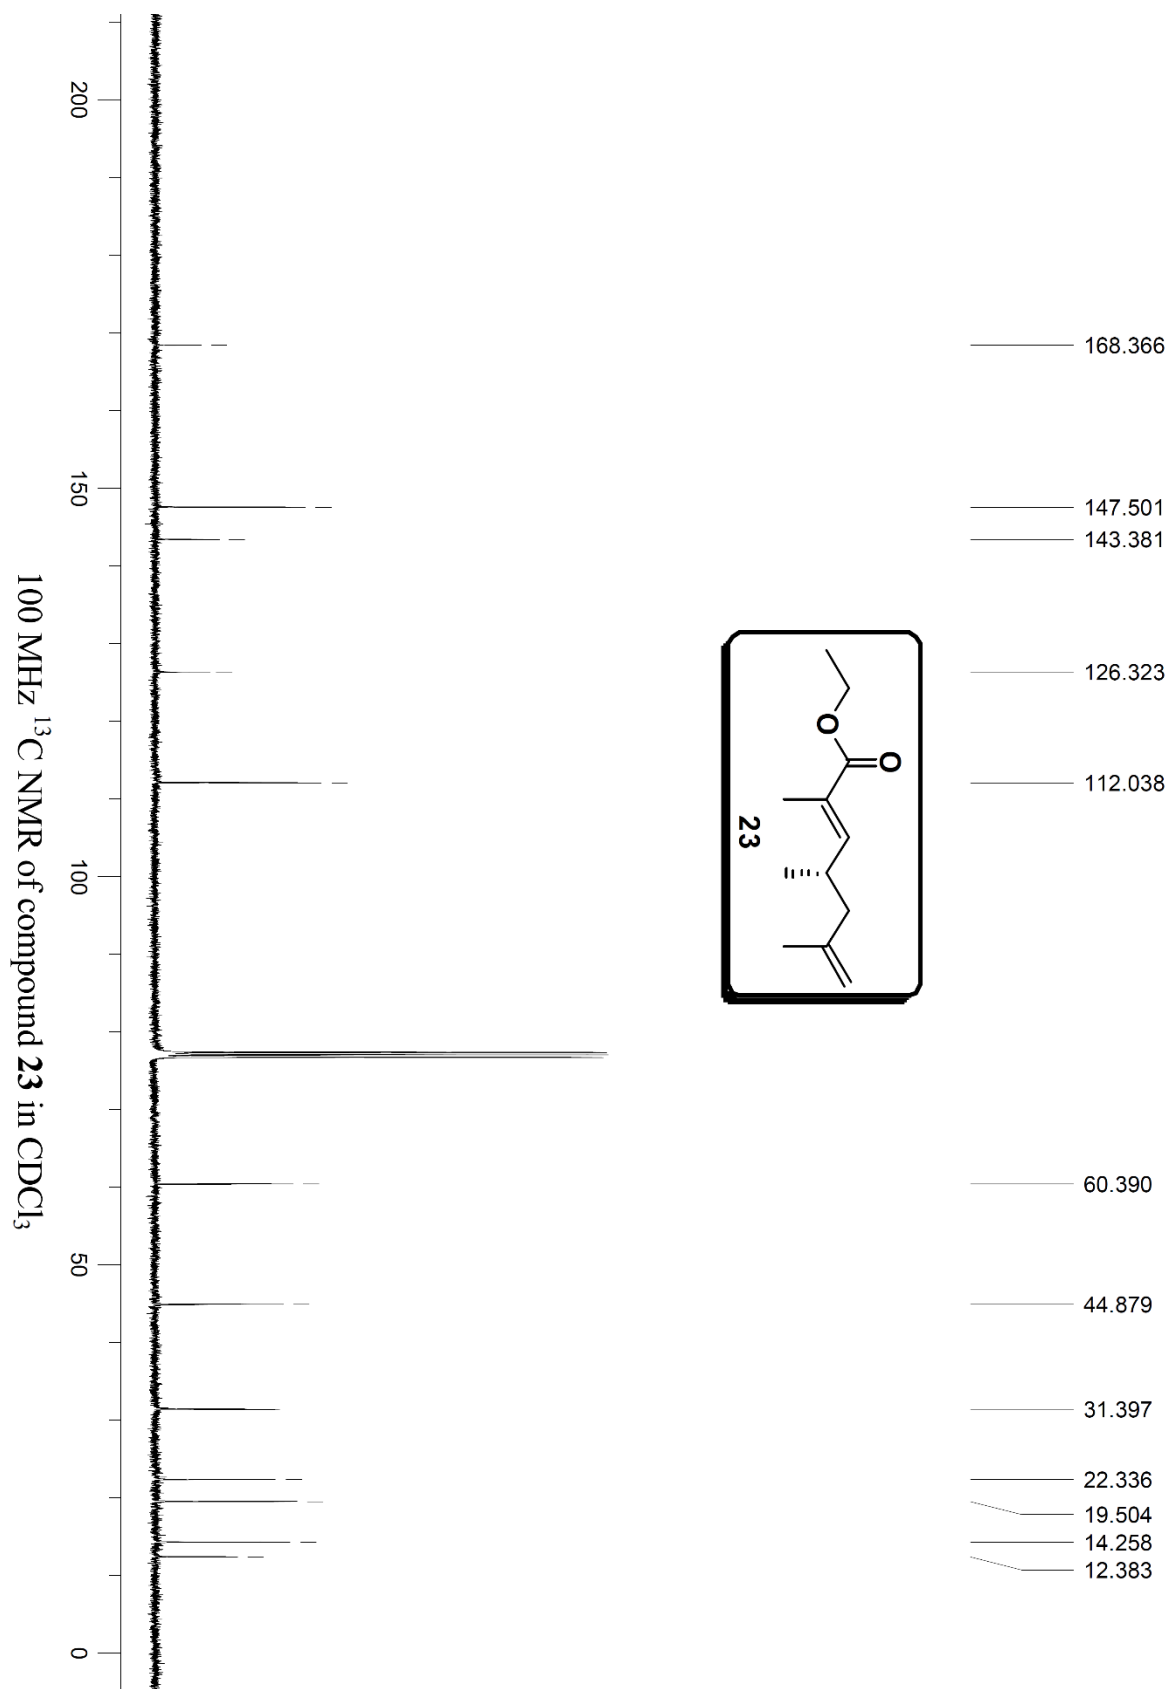



400 MHz <sup>1</sup>H NMR of compound **24** in CDCl<sub>3</sub>

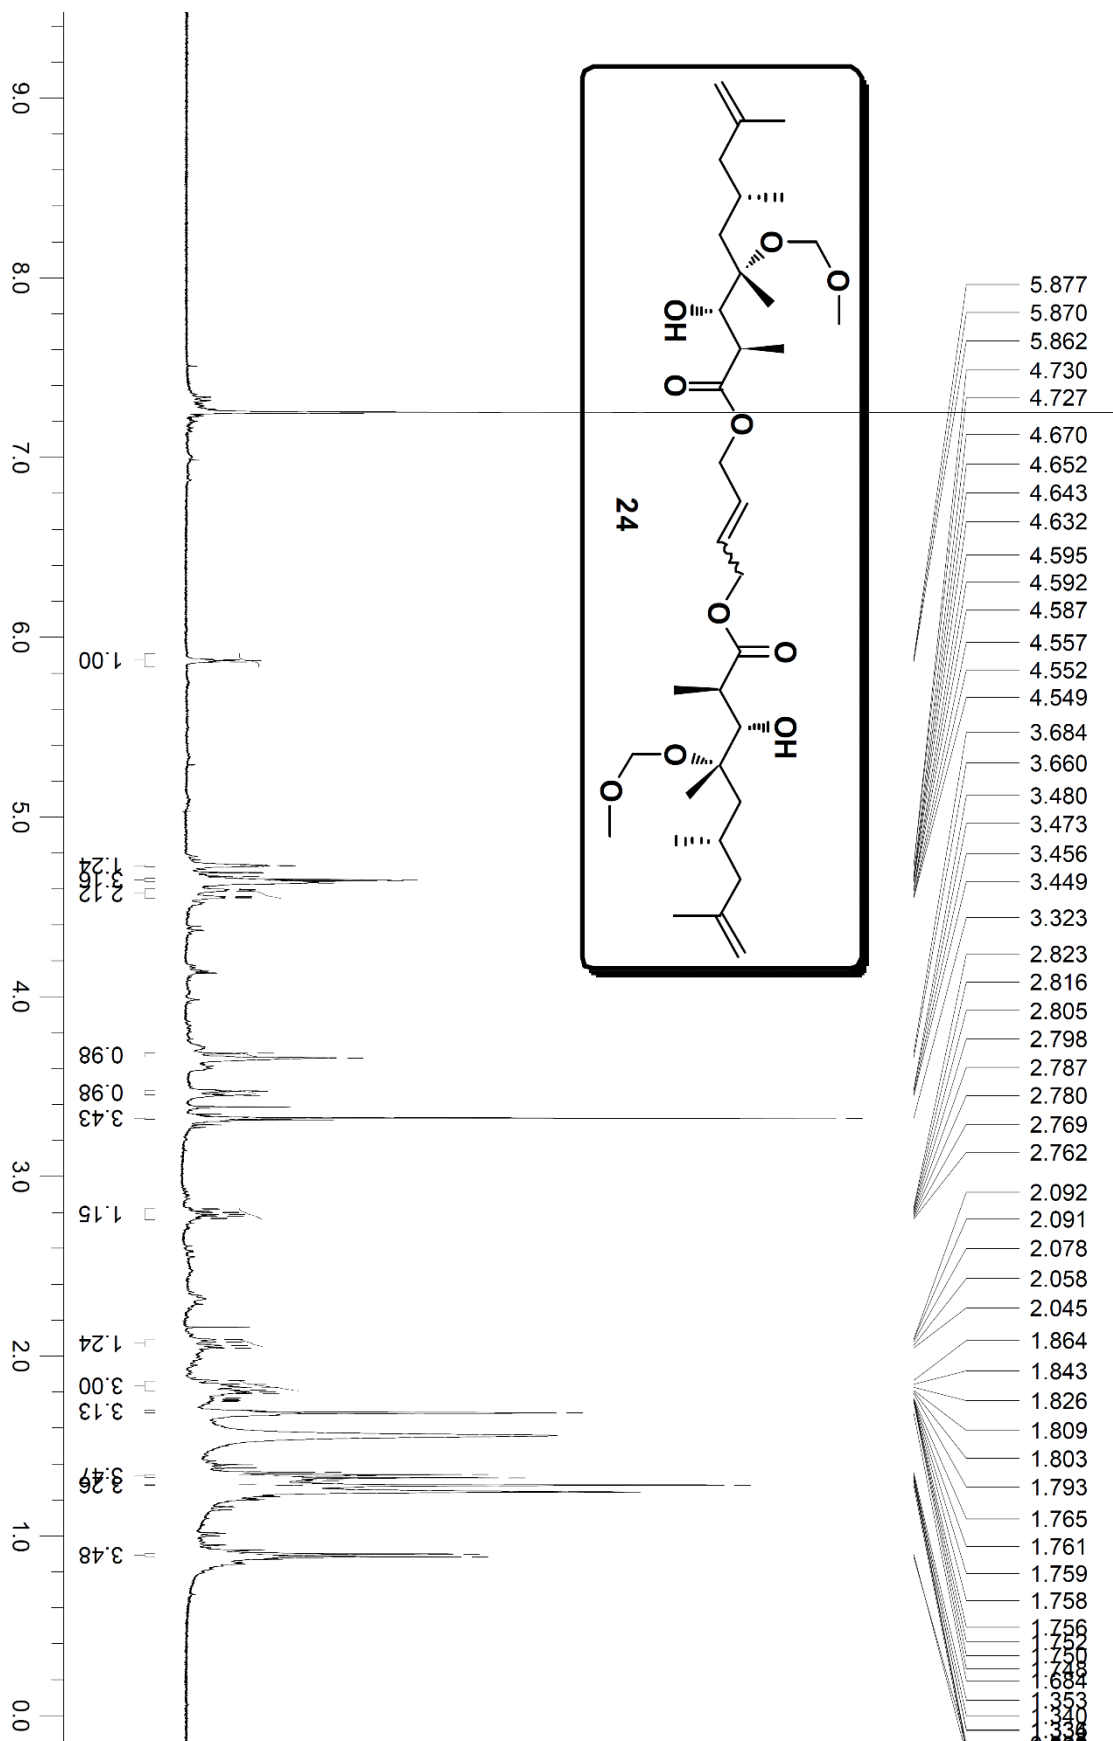

100 MHz  $^{13}\text{C}$  NMR of compound **24** in  $\text{CDCl}_3$

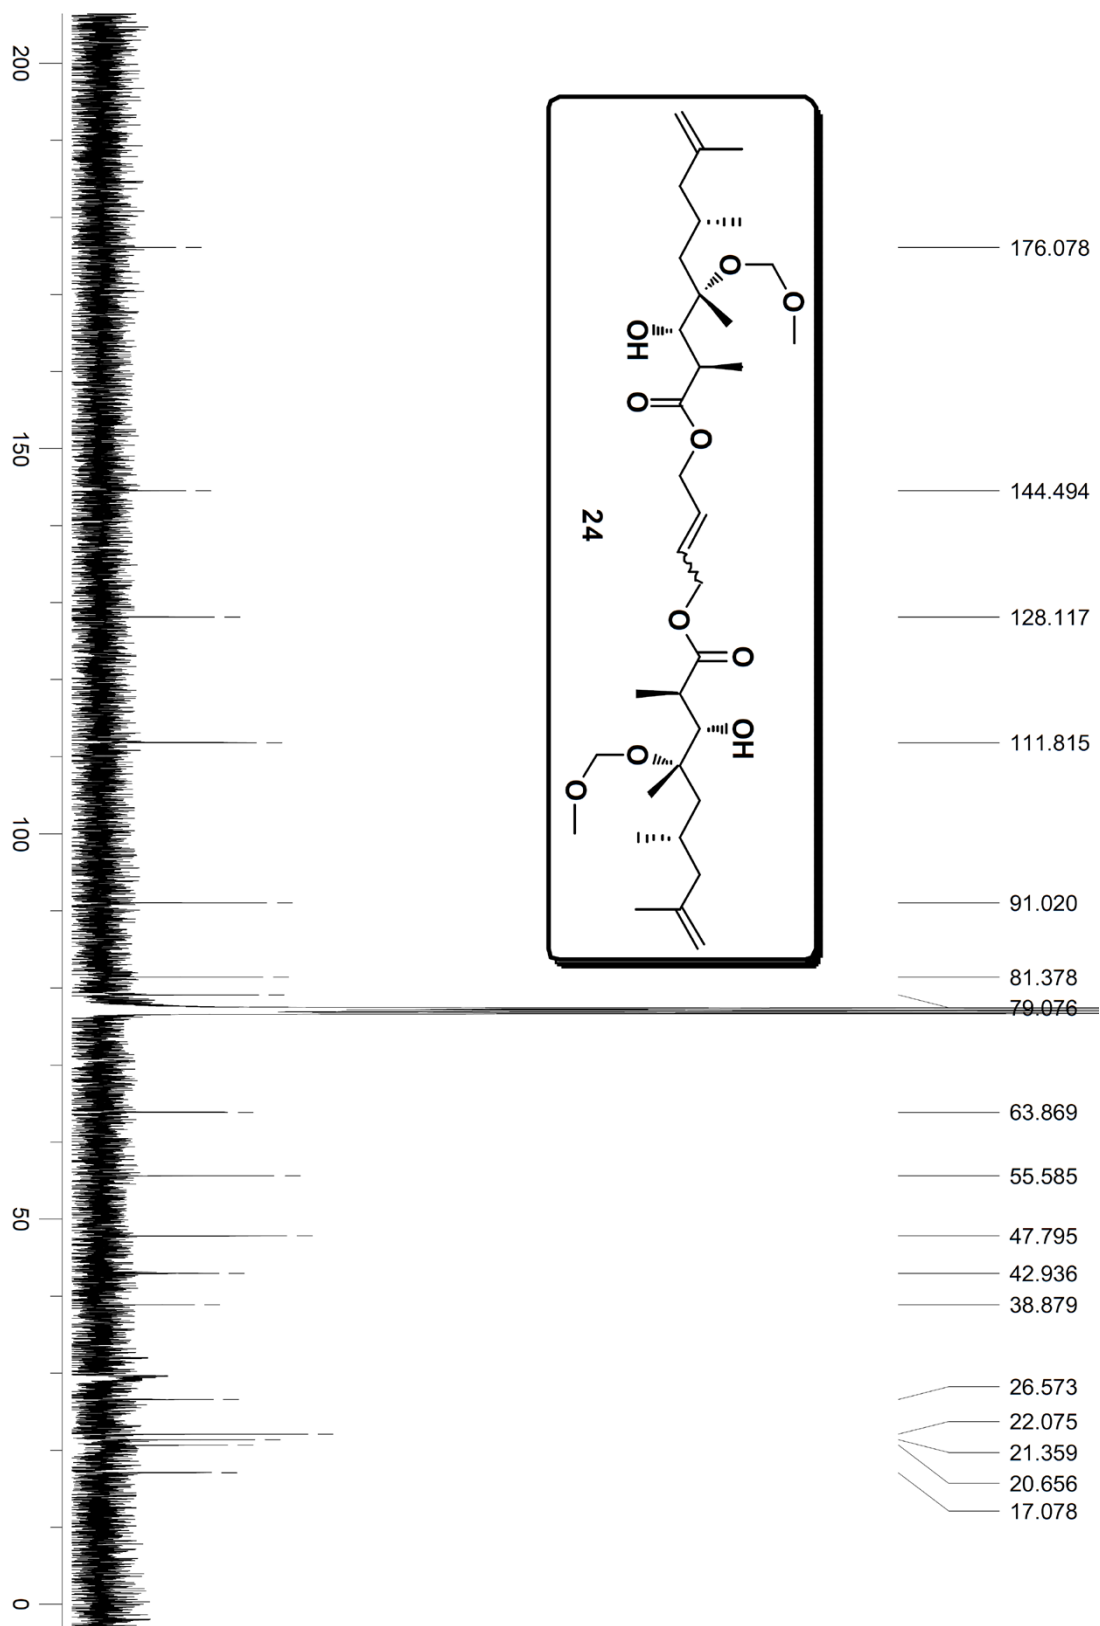



100 MHz  $^{13}\text{C}$  NMR of compound **25** in  $\text{CDCl}_3$

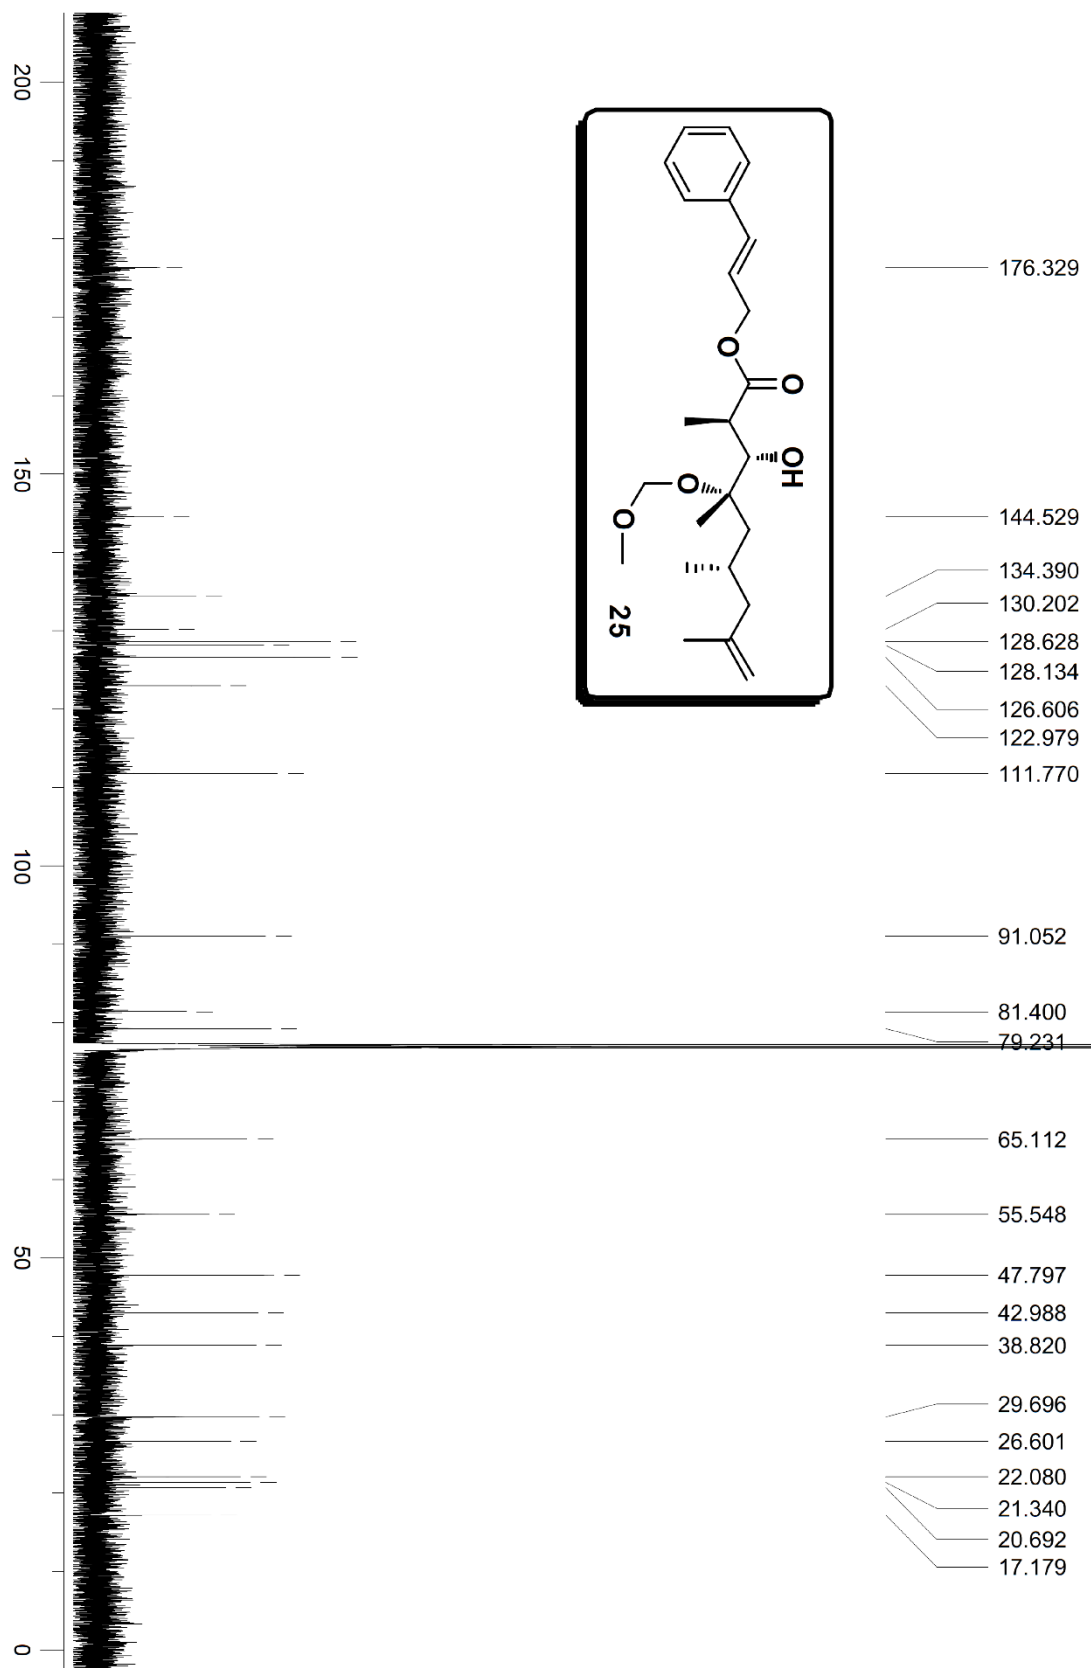

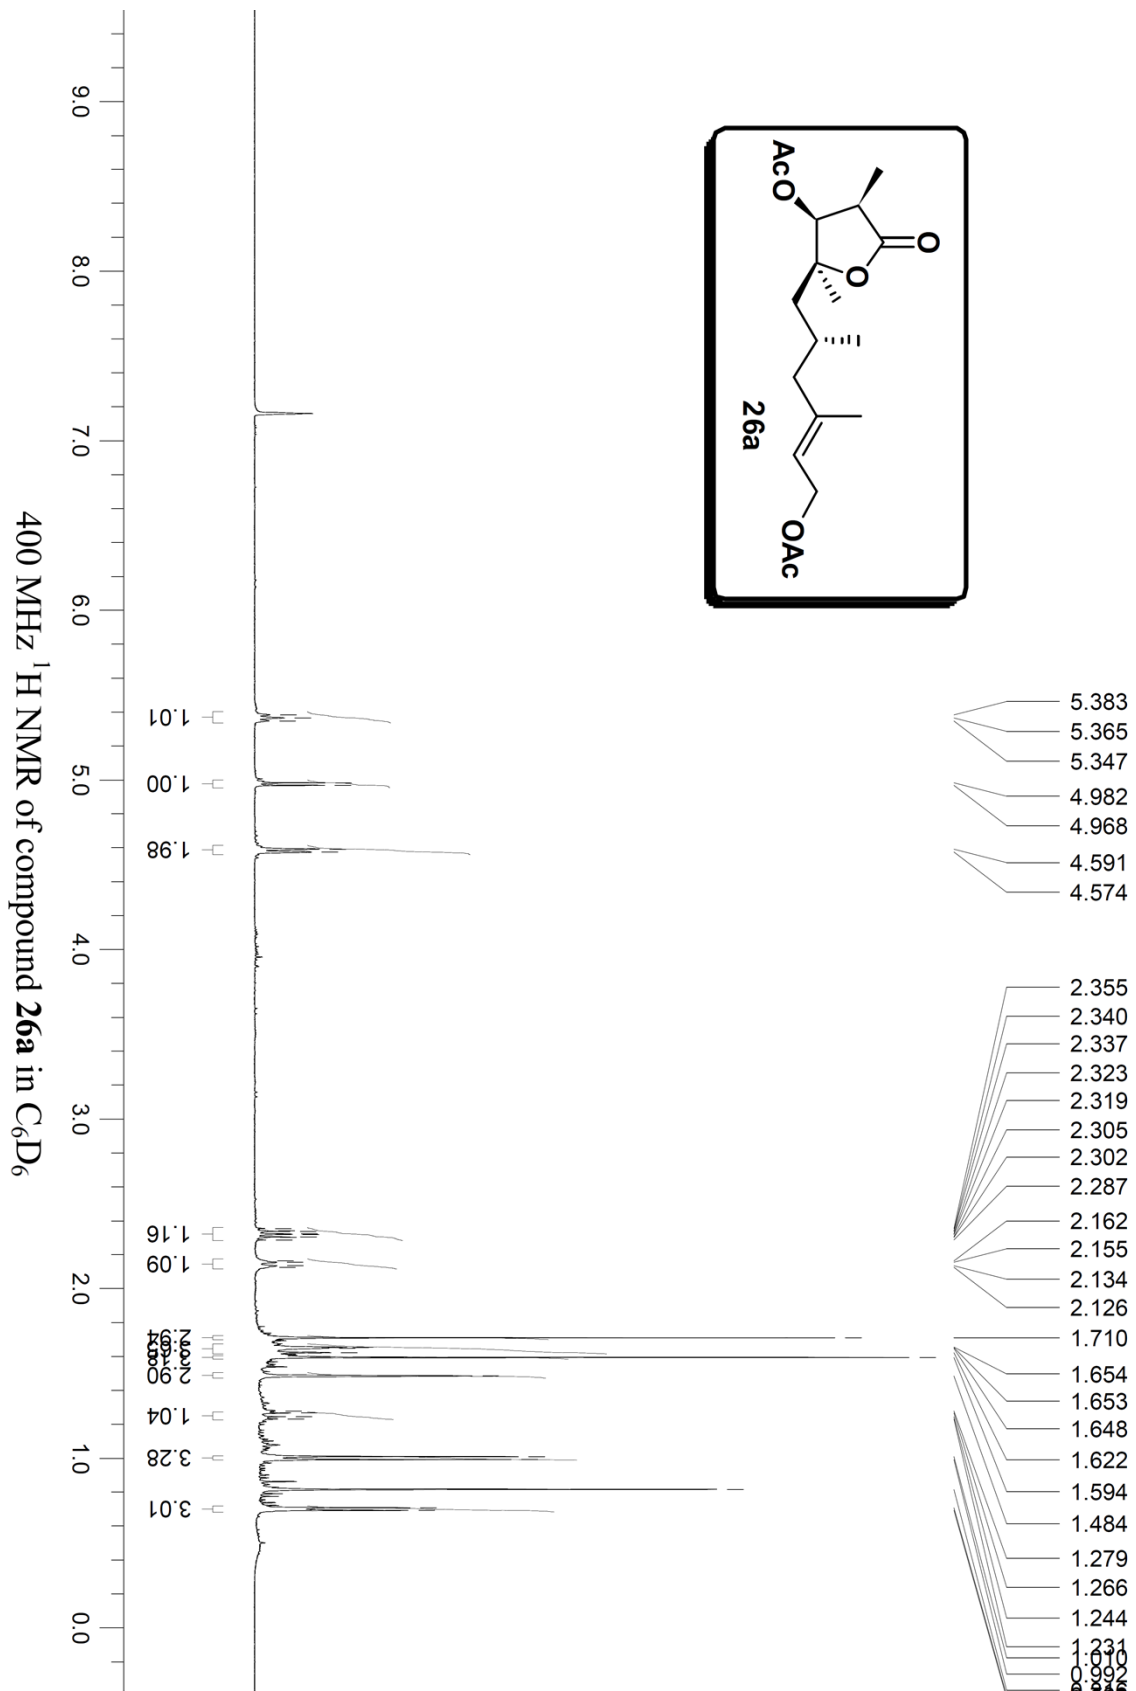

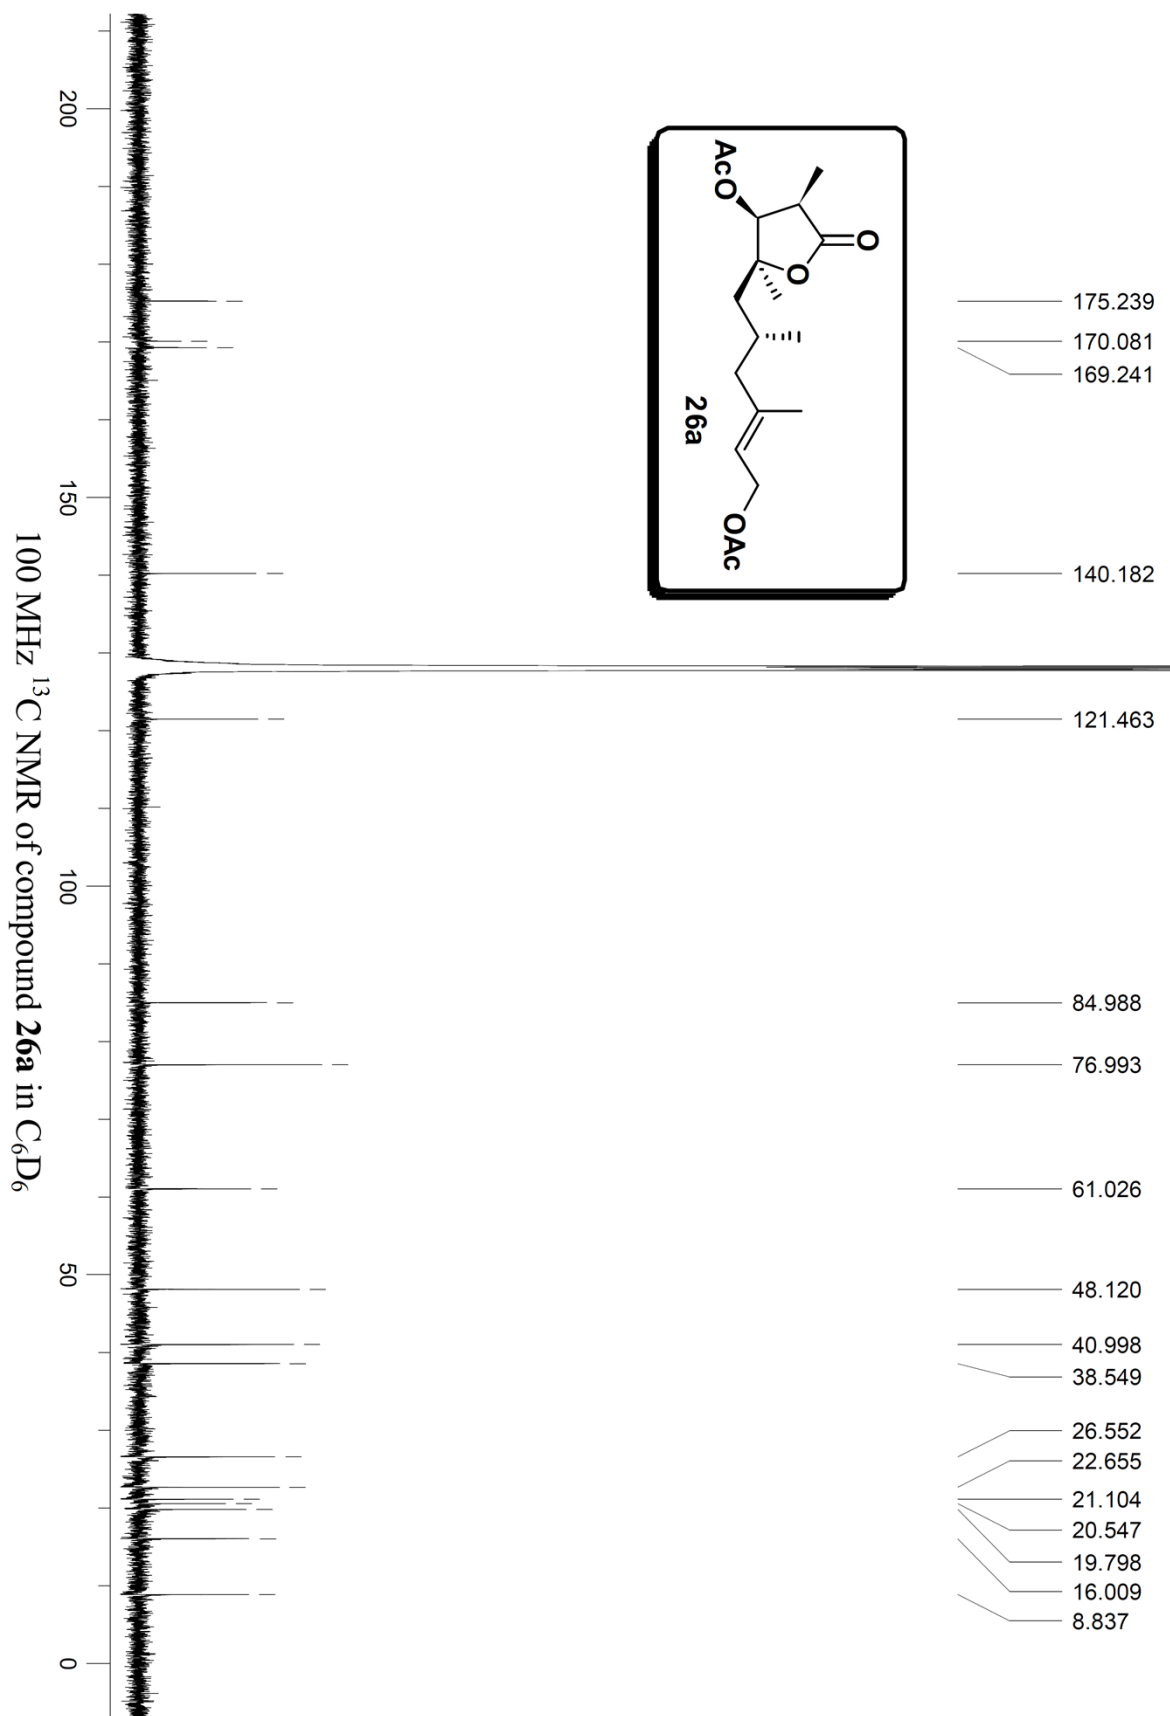

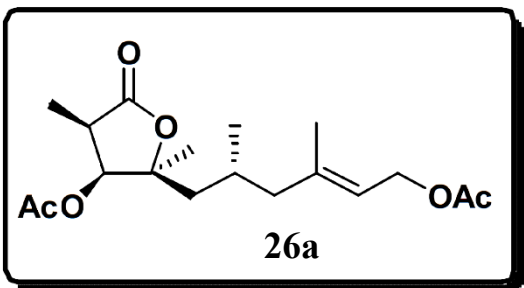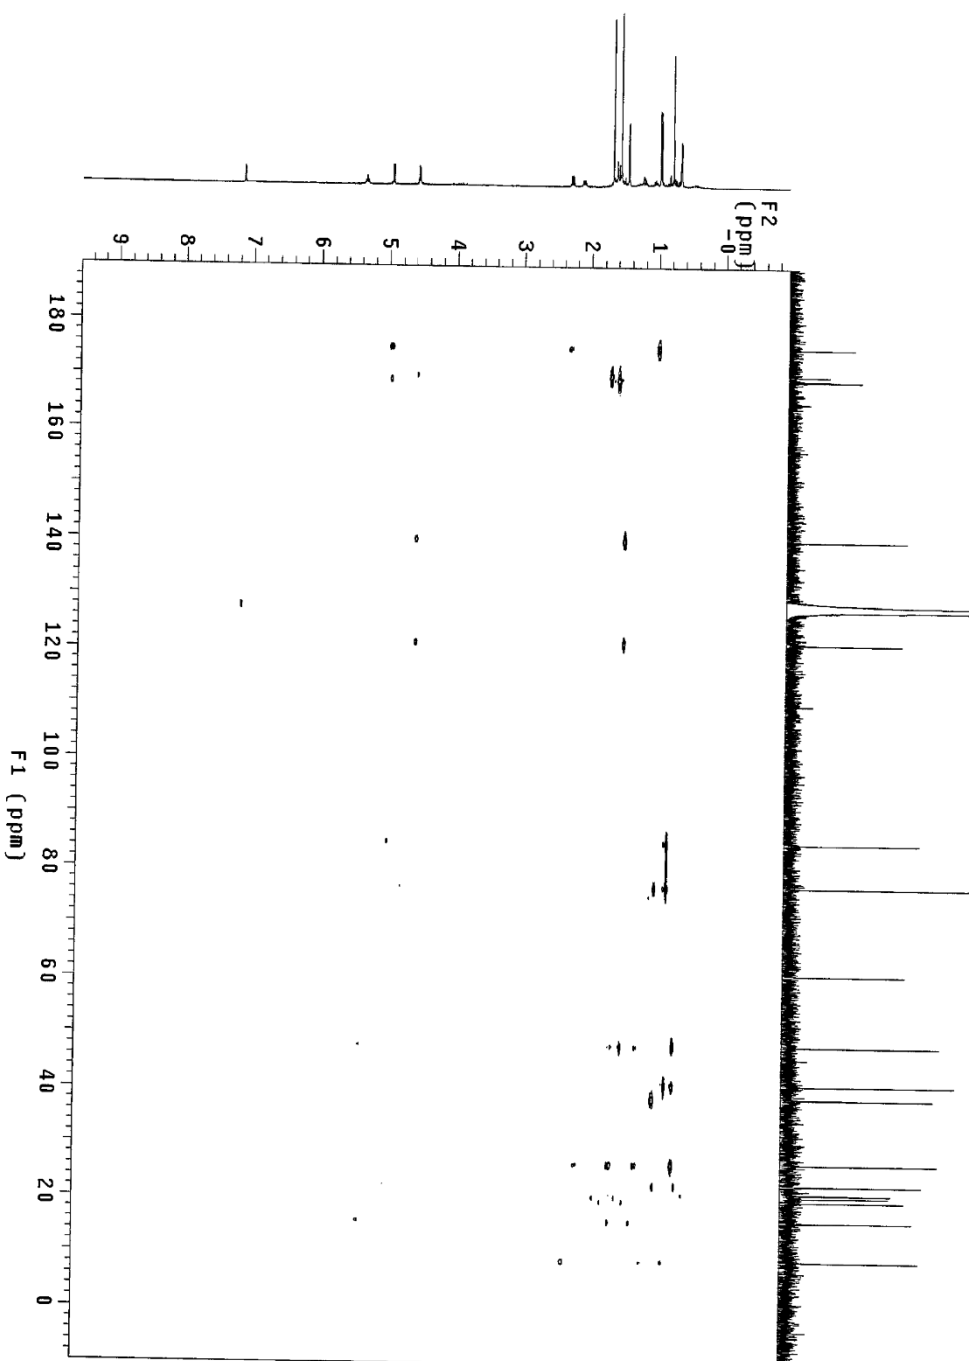

g-HMBC of compound 26a
